# Supplementary material for: G-Quadruplex DNA and Other Non-Canonical B-Form DNA Motifs Influence Productive and Latent HIV-1 Integration and Reactivation Potential
Source: MDPI journal article supplement (doi:10.3390/v14112494), 2022-11-11
Supplement: s1 [file s1]

## **SUPPLEMENTAL INFORMATION:**

### **Supplemental Figure Legends:**

**Supplemental Figure 1: Integration site profiles from productively infected cells (PIC), reactivated latently infected cells (RLIC), and non-reactivated latently infected cells (NRLIC) from the Battivelli dataset.** Heatmap depicting the fold enrichment or depletion of integration sites in common genomic features compared to the MRC. The 'RLIC+NRLIC' population was compared to the PIC population. \*  $P < 0.05$ , \*\*  $P < 0.01$ , \*\*\*  $P < 0.001$ , \*\*\*\*  $P < 0.0001$ . Infinite number (inf), 1 or more integrations were observed when 0 integrations were expected by chance. Not a number (nan), 0 integrations were observed and 0 were expected by chance. Related to Figure 5.

Figure S1

|                                     | PIC      |          |          |            |          |
|-------------------------------------|----------|----------|----------|------------|----------|
|                                     | Within   | 1-499    | 500-4999 | 5000-49999 | >50000   |
| CpG Islands                         | 0.48     | 0.89     | 2.43**** | 1.82****   | 0.59**** |
| DNaseI hypersensitivity sites       | 1.35**** | 1.37**** | 0.77**** | 0.14****   | 0.04**** |
| Endogenous retroviruses             | 0.62***  | 0.68***  | 0.78**** | 1.97****   | 1.16     |
| Long interspersed nuclear elements  | 0.84*    | 0.96     | 1.16**** | 1.96****   | 0.00**   |
| Low complexity repeats              | 0.83     | 0.69**   | 1.15**** | 1.10*      | 0.11**   |
| RefSeq genes                        | 1.90**** | 0.54     | 0.96     | 0.44****   | 0.23**** |
| Satellite DNA                       | 0.39     | 4.44*    | 1.39     | 1.50*      | 1.20*    |
| Simple repeats                      | 1.80**   | 1.19*    | 1.06*    | 0.85       | 0.00**   |
| Short interspersed nuclear elements | 1.5****  | 1.5****  | 0.74**** | 0.23****   | 0.14*    |
| Transcription start sites           | 0.00     | 1.20     | 2.19**** | 1.54****   | 0.42**** |
| UCSC genes                          | 1.89**** | 0.27*    | 0.78     | 0.46****   | 0.27**** |

|                                     | RLIC     |        |          |            |         |
|-------------------------------------|----------|--------|----------|------------|---------|
|                                     | Within   | 1-499  | 500-4999 | 5000-49999 | >50000  |
| CpG Islands                         | 0.00     | 3.75   | 1.76*    | 1.56****   | 0.76*   |
| DNaseI hypersensitivity sites       | 1.64**   | 1.36** | 0.68**   | 0.17*      | 0.24    |
| Endogenous retroviruses             | 0.72     | 1.09   | 0.88     | 1.55***    | 0.59    |
| Long interspersed nuclear elements  | 0.94     | 0.98   | 1.07     | 2.42**     | 0.00    |
| Low complexity repeats              | 1.67     | 1.03   | 0.92     | 1.30*      | 0.59    |
| RefSeq genes                        | 1.74**** | 0.00   | 0.88     | 0.47**     | 0.58**  |
| Satellite DNA                       | 2.50     | 0.00   | 0.00     | 1.52       | 1.61*   |
| Simple repeats                      | 2.22     | 1.44*  | 0.94     | 0.99       | 0.00    |
| Short interspersed nuclear elements | 1.67**   | 1.43** | 0.69***  | 1.08       | 0.77    |
| Transcription start sites           | nan      | 1.00   | 2.43**** | 1.23*      | 0.65*** |
| UCSC genes                          | 1.69**** | 0.00   | 1.06     | 0.49**     | 0.56**  |

|                                     | NRLIC    |          |          |            |         |
|-------------------------------------|----------|----------|----------|------------|---------|
|                                     | Within   | 1-499    | 500-4999 | 5000-49999 | >50000  |
| CpG Islands                         | 0.60     | 1.33     | 1.61***  | 1.44****   | 0.86**  |
| DNaseI hypersensitivity sites       | 1.17     | 1.34**** | 0.79**** | 0.36***    | 0.78    |
| Endogenous retroviruses             | 0.98     | 1.16     | 0.95     | 1.30****   | 0.92    |
| Long interspersed nuclear elements  | 0.59**** | 1.15*    | 1.26**** | 1.25       | 0.16*   |
| Low complexity repeats              | 0.71     | 0.91     | 1.07     | 1.11       | 1.20    |
| RefSeq genes                        | 1.39**** | 1.76     | 0.77     | 0.87       | 0.77*** |
| Satellite DNA                       | 4.48**** | 2.50     | 0.69     | 1.25       | 0.93    |
| Simple repeats                      | 2.39**** | 1.07     | 1.06     | 0.96       | 0.00**  |
| Short interspersed nuclear elements | 1.42***  | 1.15*    | 0.93     | 0.80       | 0.92    |
| Transcription start sites           | 0.00     | 0.80     | 1.68**** | 1.20***    | 0.85**  |
| UCSC genes                          | 1.38**** | 1.39     | 0.72     | 0.90       | 0.78**  |

|                                     | (NRLIC+RLIC) vs. PIC |         |          |            |          |
|-------------------------------------|----------------------|---------|----------|------------|----------|
|                                     | Within               | 1-499   | 500-4999 | 5000-49999 | >50000   |
| CpG Islands                         | 1.16                 | 1.16    | 0.73*    | 0.78****   | 1.45**** |
| DNaseI hypersensitivity sites       | 0.91                 | 0.99    | 1.03     | 2.31       | 8.09*    |
| Endogenous retroviruses             | 1.56*                | 1.60*** | 1.23***  | 0.66****   | 1.04     |
| Long interspersed nuclear elements  | 0.78*                | 1.15    | 1.05     | 0.76       | inf      |
| Low complexity repeats              | 1.16                 | 1.39*   | 0.93     | 0.99       | 12.71**  |
| RefSeq genes                        | 0.75****             | 1.73    | 0.81     | 1.75****   | 3.29**** |
| Satellite DNA                       | 8.09**               | 0.29    | 0.46     | 0.86       | 0.87     |
| Simple repeats                      | 1.22                 | 1.03    | 0.96     | 1.13       | nan      |
| Short interspersed nuclear elements | 0.95                 | 0.85**  | 1.14*    | 3.47***    | 9.25*    |
| Transcription start sites           | nan                  | 0.58    | 0.82*    | 0.77****   | 1.98**** |
| UCSC genes                          | 0.75****             | 2.89    | 0.99     | 1.69***    | 2.91**** |

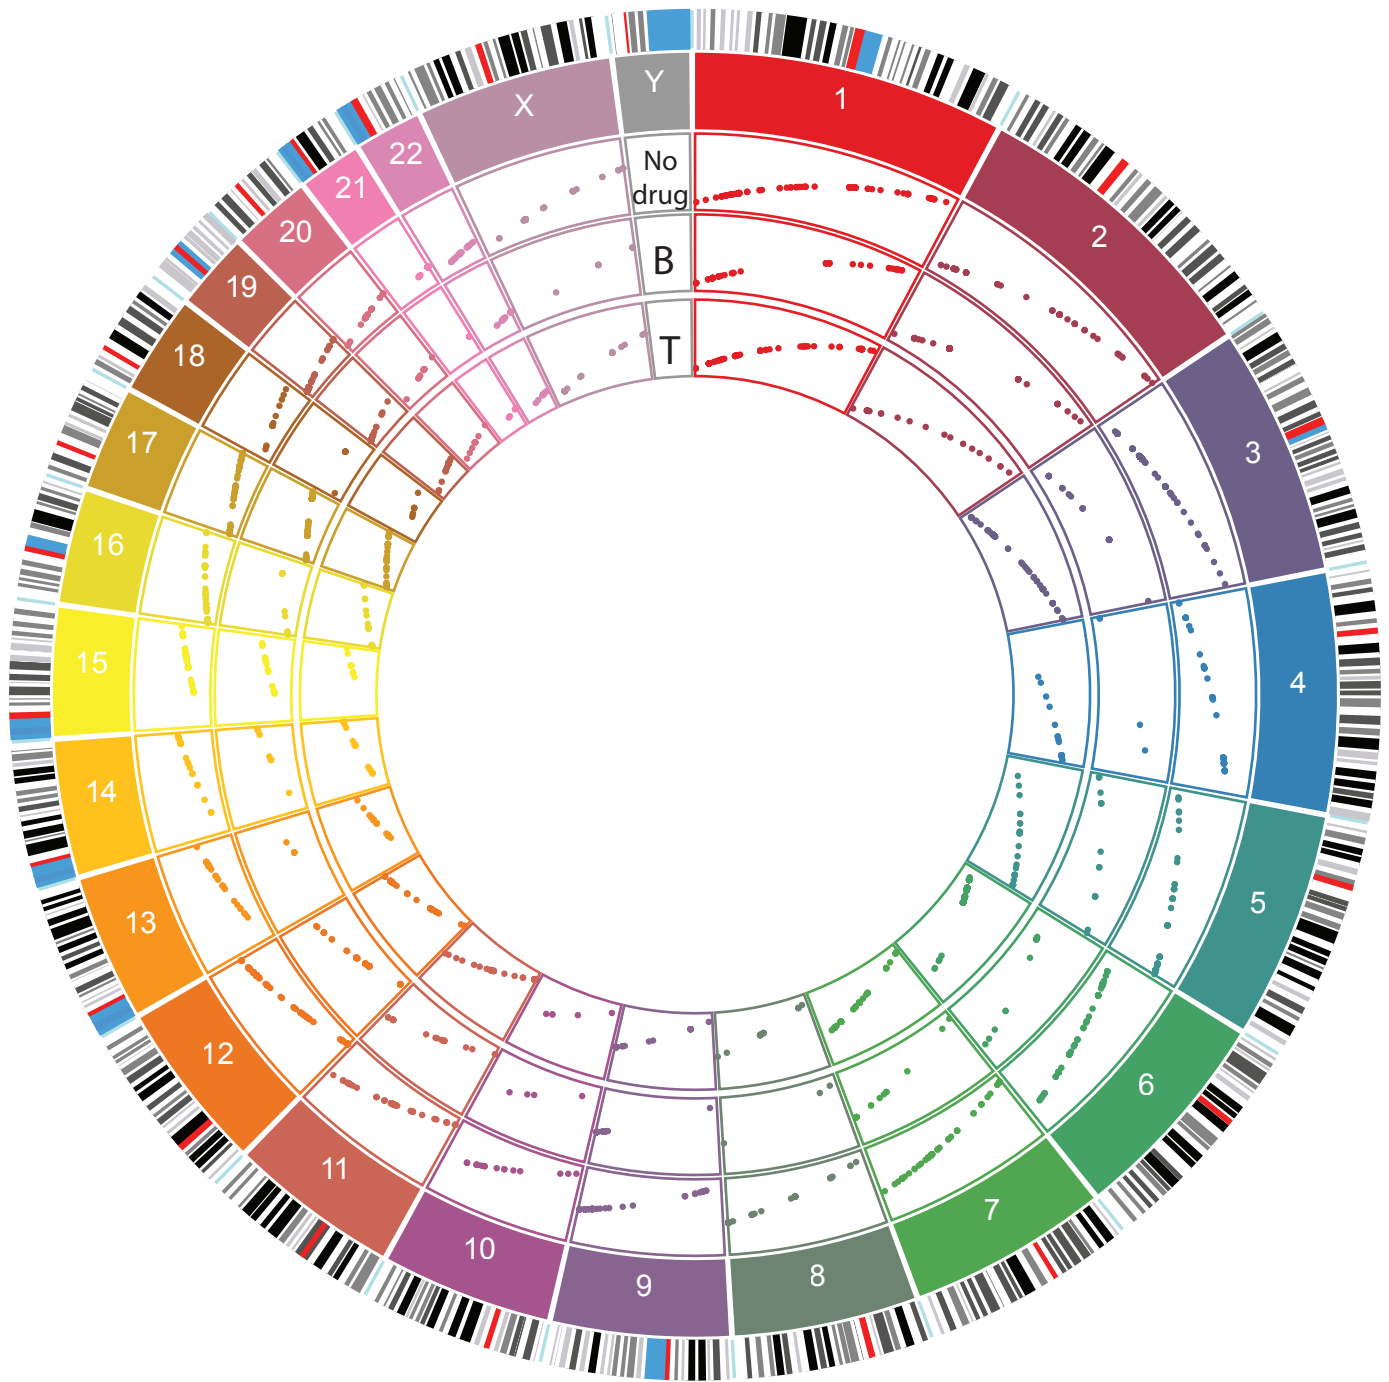

Figure S2: Circa plot showing the distribution of integration sites on each chromosome (hg19). The rings (from outer to inner) depict the cytoband pattern, chromosome numbers, location of integration sites in the absence of treatment ('No Drug'), location of integration sites in the presence of BRACO-19 (32  $\mu$ M) ('B') and location of integration sites in the presence of TmPyP4 (8  $\mu$ M) ('T').

**Table S1: List of integration site datasets used in this study.**

| <b>Dataset</b> | <b>Group</b>                              | <b># of unique integration sites</b> | <b>Cell Type</b>     | <b>Reference</b>         |
|----------------|-------------------------------------------|--------------------------------------|----------------------|--------------------------|
| Battivelli     | Productively Infected (PIC)               | 950                                  | Primary CD4+ T cells | Battivelli et al. (2018) |
|                | Reactivated Latently Infected (RLIC)      | 153                                  | Primary CD4+ T cells |                          |
|                | Non-Reactivated Latently Infected (NRLIC) | 669                                  | Primary CD4+ T cells |                          |
| Achuthan       | Wild type (WT)                            | 277                                  | 293T cells           | Achuthan et al. (2018)   |
|                | LEDGF/p75 depletion (BID)                 | 2949                                 | 293T cells           |                          |
|                | CPSF6 depletion (A77V)                    | 4431                                 | 293T cells           |                          |
| This study     | Untreated                                 | 2017                                 | 293T cells           | This study               |
|                | BRACO19 (1 uM)                            | 797                                  | 293T cells           |                          |
|                | BRACO19 (3 uM)                            | 1073                                 | 293T cells           |                          |
|                | BRACO19 (32 uM)                           | 759                                  | 293T cells           |                          |
|                | TMPyP4 (0.5 uM)                           | 1223                                 | 293T cells           |                          |
|                | TMPyP4 (1 uM)                             | 1286                                 | 293T cells           |                          |
|                | TMPyP4 (8 uM)                             | 1302                                 | 293T cells           |                          |
