# Supplementary material for: G-Quadruplex DNA and Other Non-Canonical B-Form DNA Motifs Influence Productive and Latent HIV-1 Integration and Reactivation Potential
Source: Viruses. 2022 Nov 11;14(11):2494. doi: 10.3390/v14112494 (PMC9692945; doi:10.3390/v14112494)
Supplement: Supplementary file 1 [file viruses-14-02494-s001.zip]

Archive with 10 entries (10 files):
- Supplemental Figs and Table1.pdf
- __MACOSX/._Supplemental Figs and Table1.pdf
- Table S2 - Battivelli Data.xlsx
- __MACOSX/._Table S2 - Battivelli Data.xlsx
- Table S3 - Kohio Data.xlsx
- __MACOSX/._Table S3 - Kohio Data.xlsx
- Table S4 - Achuthan Data.xlsx
- __MACOSX/._Table S4 - Achuthan Data.xlsx
- Table S5 - Telomeres.xlsx
- __MACOSX/._Table S5 - Telomeres.xlsx
