# Supplementary material for: G-Quadruplex DNA and Other Non-Canonical B-Form DNA Motifs Influence Productive and Latent HIV-1 Integration and Reactivation Potential
Source: Viruses. 2022 Nov 11;14(11):2494. doi: 10.3390/v14112494 (PMC9692945; doi:10.3390/v14112494)
Supplement: Supplementary file 1 [file viruses-14-02494-s001.zip › Table S2 - Battivelli Data.xlsx]

## Sheet: PIC_Genomic
Table S2: Integration site distribution from productively infected cells (PIC), reactivated latently infected cells (RLIC), and non-reactivated latently infected cells (NRLIC) from the Battivelli dataset.
Features	PIC	Random	PICtotal	Randomtotal	PIC %	Random %	fold	PIC_diff	Random_diff	Table1	fisher	sig_rank
CpG_Islands_Bin0	3	63	950	9500	0.315789	0.663158	0.48	947	9437	[[3, 947], [63, 9437]]	0.279905
Bin1_1-499	9	101	950	9500	0.947368	1.06316	0.89	941	9399	[[9, 941], [101, 9399]]	0.868097
Bin2_500-4999	140	575	950	9500	14.7368	6.05263	2.43	810	8925	[[140, 810], [575, 8925]]	2.18562e-19	****
Bin3_5000-49999	532	2929	950	9500	56	30.8316	1.82	418	6571	[[532, 418], [2929, 6571]]	3.86295e-52	****
Bin4_50000-499999	245	4179	950	9500	25.7895	43.9895	0.59	705	5321	[[245, 705], [4179, 5321]]	1.48049e-28	****
DHS_Bin0	187	1383	950	9500	19.6842	14.5579	1.35	763	8117	[[187, 763], [1383, 8117]]	4.95394e-05	****
Bin1_1-499	499	3644	950	9500	52.5263	38.3579	1.37	451	5856	[[499, 451], [3644, 5856]]	4.76409e-17	****
Bin2_500-4999	258	3346	950	9500	27.1579	35.2211	0.77	692	6154	[[258, 692], [3346, 6154]]	4.30341e-07	****
Bin3_5000-49999	5	355	950	9500	0.526316	3.73684	0.14	945	9145	[[5, 945], [355, 9145]]	9.52969e-10	****
Bin4_50000-499999	1	262	950	9500	0.105263	2.75789	0.04	949	9238	[[1, 949], [262, 9238]]	5.78053e-10	****
Endogenous_retroviruses_Bin0	51	817	950	9500	5.36842	8.6	0.62	899	8683	[[51, 899], [817, 8683]]	0.000340027	***
Bin1_1-499	88	1288	950	9500	9.26316	13.5579	0.68	862	8212	[[88, 862], [1288, 8212]]	0.000126602	***
Bin2_500-4999	339	4368	950	9500	35.6842	45.9789	0.78	611	5132	[[339, 611], [4368, 5132]]	1.04071e-09	****
Bin3_5000-49999	462	2341	950	9500	48.6316	24.6421	1.97	488	7159	[[462, 488], [2341, 7159]]	2.08555e-51	****
Bin4_50000-499999	10	86	950	9500	1.05263	0.905263	1.16	940	9414	[[10, 940], [86, 9414]]	0.59327
LADs_Bin0	135	3512	950	9500	14.2105	36.9684	0.38	815	5988	[[135, 815], [3512, 5988]]	1.0556e-50	****
Bin1_1-499	1	6	950	9500	0.105263	0.0631579	1.67	949	9494	[[1, 949], [6, 9494]]	0.486945
Bin2_500-4999	2	28	950	9500	0.210526	0.294737	0.71	948	9472	[[2, 948], [28, 9472]]	1
Bin3_5000-49999	42	321	950	9500	4.42105	3.37895	1.31	908	9179	[[42, 908], [321, 9179]]	0.0947393
Bin4_50000-499999	218	1846	950	9500	22.9474	19.4316	1.18	732	7654	[[218, 732], [1846, 7654]]	0.0103329	*
Long_interspersed_nuclear_elements_Bin0	167	1978	950	9500	17.5789	20.8211	0.84	783	7522	[[167, 783], [1978, 7522]]	0.0182818	*
Bin1_1-499	231	2396	950	9500	24.3158	25.2211	0.96	719	7104	[[231, 719], [2396, 7104]]	0.556479
Bin2_500-4999	471	4049	950	9500	49.5789	42.6211	1.16	479	5451	[[471, 479], [4049, 5451]]	4.29098e-05	****
Bin3_5000-49999	81	413	950	9500	8.52632	4.34737	1.96	869	9087	[[81, 869], [413, 9087]]	1.28706e-07	****
Bin4_50000-499999	0	69	950	9500	0	0.726316	0	950	9431	[[0, 950], [69, 9431]]	0.0024853	**
Low_complexity_repeats_Bin0	5	60	950	9500	0.526316	0.631579	0.83	945	9440	[[5, 945], [60, 9440]]	0.831026
Bin1_1-499	69	1001	950	9500	7.26316	10.5368	0.69	881	8499	[[69, 881], [1001, 8499]]	0.00111463	**
Bin2_500-4999	515	4481	950	9500	54.2105	47.1684	1.15	435	5019	[[515, 435], [4481, 5019]]	3.69977e-05	****
Bin3_5000-49999	360	3271	950	9500	37.8947	34.4316	1.1	590	6229	[[360, 590], [3271, 6229]]	0.0349735	*
Bin4_50000-499999	1	87	950	9500	0.105263	0.915789	0.11	949	9413	[[1, 949], [87, 9413]]	0.00432152	**
RefSeq_genes_Bin0	771	4056	950	9500	81.1579	42.6947	1.9	179	5444	[[771, 179], [4056, 5444]]	2.29707e-119	****
Bin1_1-499	4	74	950	9500	0.421053	0.778947	0.54	946	9426	[[4, 946], [74, 9426]]	0.319515
Bin2_500-4999	43	447	950	9500	4.52632	4.70526	0.96	907	9053	[[43, 907], [447, 9053]]	0.872171
Bin3_5000-49999	76	1732	950	9500	8	18.2316	0.44	874	7768	[[76, 874], [1732, 7768]]	9.15849e-18	****
Bin4_50000-499999	53	2261	950	9500	5.57895	23.8	0.23	897	7239	[[53, 897], [2261, 7239]]	2.53195e-48	****
Satellite_DNA_Bin0	2	51	950	9500	0.210526	0.536842	0.39	948	9449	[[2, 948], [51, 9449]]	0.232222
Bin1_1-499	4	9	950	9500	0.421053	0.0947368	4.44	946	9491	[[4, 946], [9, 9491]]	0.0249064	*
Bin2_500-4999	5	36	950	9500	0.526316	0.378947	1.39	945	9464	[[5, 945], [36, 9464]]	0.417156
Bin3_5000-49999	31	207	950	9500	3.26316	2.17895	1.5	919	9293	[[31, 919], [207, 9293]]	0.0393828	*
Bin4_50000-499999	141	1174	950	9500	14.8421	12.3579	1.2	809	8326	[[141, 809], [1174, 8326]]	0.0310705	*
Simple_repeats_Bin0	37	205	950	9500	3.89474	2.15789	1.8	913	9295	[[37, 913], [205, 9295]]	0.00144457	**
Bin1_1-499	195	1644	950	9500	20.5263	17.3053	1.19	755	7856	[[195, 755], [1644, 7856]]	0.0139924	*
Bin2_500-4999	620	5846	950	9500	65.2632	61.5368	1.06	330	3654	[[620, 330], [5846, 3654]]	0.0249406	*
Bin3_5000-49999	98	1147	950	9500	10.3158	12.0737	0.85	852	8353	[[98, 852], [1147, 8353]]	0.11515
Bin4_50000-499999	0	66	950	9500	0	0.694737	0	950	9434	[[0, 950], [66, 9434]]	0.00389652	**
Short_interspersed_nuclear_elements_Bin0	177	1178	950	9500	18.6316	12.4	1.5	773	8322	[[177, 773], [1178, 8322]]	2.10411e-07	****
Bin1_1-499	445	2973	950	9500	46.8421	31.2947	1.5	505	6527	[[445, 505], [2973, 6527]]	2.16794e-21	****
Bin2_500-4999	318	4296	950	9500	33.4737	45.2211	0.74	632	5204	[[318, 632], [4296, 5204]]	2.3296e-12	****
Bin3_5000-49999	9	386	950	9500	0.947368	4.06316	0.23	941	9114	[[9, 941], [386, 9114]]	5.0943e-08	****
Bin4_50000-499999	1	70	950	9500	0.105263	0.736842	0.14	949	9430	[[1, 949], [70, 9430]]	0.0199555	*
Transcription_start_sites_Bin0	0	1	950	9500	0	0.0105263	0	950	9499	[[0, 950], [1, 9499]]	1
Bin1_1-499	16	133	950	9500	1.68421	1.4	1.2	934	9367	[[16, 934], [133, 9367]]	0.471891
Bin2_500-4999	202	924	950	9500	21.2632	9.72632	2.19	748	8576	[[202, 748], [924, 8576]]	3.48105e-23	****
Bin3_5000-49999	578	3761	950	9500	60.8421	39.5895	1.54	372	5739	[[578, 372], [3761, 5739]]	4.21615e-36	****
Bin4_50000-499999	152	3627	950	9500	16	38.1789	0.42	798	5873	[[152, 798], [3627, 5873]]	1.3672e-46	****
UCSC_genes_Bin0	774	4100	950	9500	81.4737	43.1579	1.89	176	5400	[[774, 176], [4100, 5400]]	9.04922e-119	****
Bin1_1-499	2	75	950	9500	0.210526	0.789474	0.27	948	9425	[[2, 948], [75, 9425]]	0.0449315	*
Bin2_500-4999	35	446	950	9500	3.68421	4.69474	0.78	915	9054	[[35, 915], [446, 9054]]	0.167669
Bin3_5000-49999	78	1694	950	9500	8.21053	17.8316	0.46	872	7806	[[78, 872], [1694, 7806]]	5.67293e-16	****
Bin4_50000-499999	60	2223	950	9500	6.31579	23.4	0.27	890	7277	[[60, 890], [2223, 7277]]	2.92265e-42	****

## Sheet: RLIC_Genomic
Features	RLIC	Random	RLICtotal	Randomtotal	RLIC %	Random %	fold	RLIC_diff	Random_diff	Table1	fisher	sig_rank
CpG_Islands_Bin0	0	6	153	1530	0	0.392157	0	153	1524	[[0, 153], [6, 1524]]	1
Bin1_1-499	3	8	153	1530	1.96078	0.522876	3.75	150	1522	[[3, 150], [8, 1522]]	0.0705697
Bin2_500-4999	18	102	153	1530	11.7647	6.66667	1.76	135	1428	[[18, 135], [102, 1428]]	0.0302462	*
Bin3_5000-49999	72	461	153	1530	47.0588	30.1307	1.56	81	1069	[[72, 81], [461, 1069]]	3.53568e-05	****
Bin4_50000-499999	50	662	153	1530	32.6797	43.268	0.76	103	868	[[50, 103], [662, 868]]	0.0126602	*
DHS_Bin0	34	207	153	1530	22.2222	13.5294	1.64	119	1323	[[34, 119], [207, 1323]]	0.00518487	**
Bin1_1-499	80	590	153	1530	52.2876	38.5621	1.36	73	940	[[80, 73], [590, 940]]	0.00128878	**
Bin2_500-4999	37	542	153	1530	24.183	35.4248	0.68	116	988	[[37, 116], [542, 988]]	0.00551399	**
Bin3_5000-49999	1	60	153	1530	0.653595	3.92157	0.17	152	1470	[[1, 152], [60, 1470]]	0.0382089	*
Bin4_50000-499999	1	42	153	1530	0.653595	2.7451	0.24	152	1488	[[1, 152], [42, 1488]]	0.1739
Endogenous_retroviruses_Bin0	11	153	153	1530	7.18954	10	0.72	142	1377	[[11, 142], [153, 1377]]	0.317255
Bin1_1-499	23	211	153	1530	15.0327	13.7908	1.09	130	1319	[[23, 130], [211, 1319]]	0.712841
Bin2_500-4999	59	668	153	1530	38.5621	43.6601	0.88	94	862	[[59, 94], [668, 862]]	0.232035
Bin3_5000-49999	59	381	153	1530	38.5621	24.902	1.55	94	1149	[[59, 94], [381, 1149]]	0.00046855	***
Bin4_50000-499999	1	17	153	1530	0.653595	1.11111	0.59	152	1513	[[1, 152], [17, 1513]]	1
LADs_Bin0	38	596	153	1530	24.8366	38.9542	0.64	115	934	[[38, 115], [596, 934]]	0.000602725	***
Bin1_1-499	0	2	153	1530	0	0.130719	0	153	1528	[[0, 153], [2, 1528]]	1
Bin2_500-4999	0	3	153	1530	0	0.196078	0	153	1527	[[0, 153], [3, 1527]]	1
Bin3_5000-49999	0	51	153	1530	0	3.33333	0	153	1479	[[0, 153], [51, 1479]]	0.0118822	*
Bin4_50000-499999	45	290	153	1530	29.4118	18.9542	1.55	108	1240	[[45, 108], [290, 1240]]	0.00288304	**
Long_interspersed_nuclear_elements_Bin0	28	297	153	1530	18.3007	19.4118	0.94	125	1233	[[28, 125], [297, 1233]]	0.830009
Bin1_1-499	38	386	153	1530	24.8366	25.2288	0.98	115	1144	[[38, 115], [386, 1144]]	1
Bin2_500-4999	72	674	153	1530	47.0588	44.0523	1.07	81	856	[[72, 81], [674, 856]]	0.495355
Bin3_5000-49999	15	62	153	1530	9.80392	4.05229	2.42	138	1468	[[15, 138], [62, 1468]]	0.00343938	**
Bin4_50000-499999	0	13	153	1530	0	0.849673	0	153	1517	[[0, 153], [13, 1517]]	0.622224
Low_complexity_repeats_Bin0	2	12	153	1530	1.30719	0.784314	1.67	151	1518	[[2, 151], [12, 1518]]	0.36829
Bin1_1-499	16	155	153	1530	10.4575	10.1307	1.03	137	1375	[[16, 137], [155, 1375]]	0.888392
Bin2_500-4999	68	738	153	1530	44.4444	48.2353	0.92	85	792	[[68, 85], [738, 792]]	0.396519
Bin3_5000-49999	66	509	153	1530	43.1373	33.268	1.3	87	1021	[[66, 87], [509, 1021]]	0.0157811	*
Bin4_50000-499999	1	17	153	1530	0.653595	1.11111	0.59	152	1513	[[1, 152], [17, 1513]]	1
RefSeq_genes_Bin0	106	610	153	1530	69.281	39.8693	1.74	47	920	[[106, 47], [610, 920]]	4.16172e-12	****
Bin1_1-499	0	12	153	1530	0	0.784314	0	153	1518	[[0, 153], [12, 1518]]	0.616389
Bin2_500-4999	6	68	153	1530	3.92157	4.44444	0.88	147	1462	[[6, 147], [68, 1462]]	1
Bin3_5000-49999	14	301	153	1530	9.15033	19.6732	0.47	139	1229	[[14, 139], [301, 1229]]	0.00101261	**
Bin4_50000-499999	22	377	153	1530	14.3791	24.6405	0.58	131	1153	[[22, 131], [377, 1153]]	0.00372918	**
Satellite_DNA_Bin0	1	4	153	1530	0.653595	0.261438	2.5	152	1526	[[1, 152], [4, 1526]]	0.379448
Bin1_1-499	0	2	153	1530	0	0.130719	0	153	1528	[[0, 153], [2, 1528]]	1
Bin2_500-4999	0	4	153	1530	0	0.261438	0	153	1526	[[0, 153], [4, 1526]]	1
Bin3_5000-49999	5	33	153	1530	3.26797	2.15686	1.52	148	1497	[[5, 148], [33, 1497]]	0.38483
Bin4_50000-499999	31	192	153	1530	20.2614	12.549	1.61	122	1338	[[31, 122], [192, 1338]]	0.011751	*
Simple_repeats_Bin0	6	27	153	1530	3.92157	1.76471	2.22	147	1503	[[6, 147], [27, 1503]]	0.113956
Bin1_1-499	44	306	153	1530	28.7582	20	1.44	109	1224	[[44, 109], [306, 1224]]	0.0158192	*
Bin2_500-4999	85	906	153	1530	55.5556	59.2157	0.94	68	624	[[85, 68], [906, 624]]	0.389809
Bin3_5000-49999	18	181	153	1530	11.7647	11.8301	0.99	135	1349	[[18, 135], [181, 1349]]	1
Bin4_50000-499999	0	12	153	1530	0	0.784314	0	153	1518	[[0, 153], [12, 1518]]	0.616389
Short_interspersed_nuclear_elements_Bin0	31	186	153	1530	20.2614	12.1569	1.67	122	1344	[[31, 122], [186, 1344]]	0.00739839	**
Bin1_1-499	65	455	153	1530	42.4837	29.7386	1.43	88	1075	[[65, 88], [455, 1075]]	0.00172141	**
Bin2_500-4999	49	711	153	1530	32.0261	46.4706	0.69	104	819	[[49, 104], [711, 819]]	0.000625649	***
Bin3_5000-49999	7	65	153	1530	4.57516	4.24837	1.08	146	1465	[[7, 146], [65, 1465]]	0.833356
Bin4_50000-499999	1	13	153	1530	0.653595	0.849673	0.77	152	1517	[[1, 152], [13, 1517]]	1
Transcription_start_sites_Bin0	0	0	153	1530	0	0	nan	153	1530	[[0, 153], [0, 1530]]	1
Bin1_1-499	2	20	153	1530	1.30719	1.30719	1	151	1510	[[2, 151], [20, 1510]]	1
Bin2_500-4999	35	144	153	1530	22.8758	9.41176	2.43	118	1386	[[35, 118], [144, 1386]]	3.24633e-06	****
Bin3_5000-49999	74	600	153	1530	48.366	39.2157	1.23	79	930	[[74, 79], [600, 930]]	0.030488	*
Bin4_50000-499999	38	589	153	1530	24.8366	38.4967	0.65	115	941	[[38, 115], [589, 941]]	0.000817149	***
UCSC_genes_Bin0	107	635	153	1530	69.9346	41.5033	1.69	46	895	[[107, 46], [635, 895]]	1.90207e-11	****
Bin1_1-499	0	7	153	1530	0	0.457516	0	153	1523	[[0, 153], [7, 1523]]	1
Bin2_500-4999	7	66	153	1530	4.57516	4.31373	1.06	146	1464	[[7, 146], [66, 1464]]	0.835
Bin3_5000-49999	14	284	153	1530	9.15033	18.5621	0.49	139	1246	[[14, 139], [284, 1246]]	0.00259281	**
Bin4_50000-499999	21	376	153	1530	13.7255	24.5752	0.56	132	1154	[[21, 132], [376, 1154]]	0.00190995	**

## Sheet: NRLIC_Genomic
Features	NRLIC	Random	NRLICtotal	Randomtotal	NRLIC %	Random %	fold	NRLIC_diff	Random_diff	Table1	fisher	sig_rank
CpG_Islands_Bin0	3	50	669	6690	0.44843	0.747384	0.6	666	6640	[[3, 666], [50, 6640]]	0.627773
Bin1_1-499	6	45	669	6690	0.896861	0.672646	1.33	663	6645	[[6, 663], [45, 6645]]	0.462079
Bin2_500-4999	70	435	669	6690	10.4634	6.50224	1.61	599	6255	[[70, 599], [435, 6255]]	0.000281706	***
Bin3_5000-49999	287	1993	669	6690	42.8999	29.7907	1.44	382	4697	[[287, 382], [1993, 4697]]	1.12064e-11	****
Bin4_50000-499999	258	2990	669	6690	38.565	44.6936	0.86	411	3700	[[258, 411], [2990, 3700]]	0.00249518	**
DHS_Bin0	114	975	669	6690	17.0404	14.574	1.17	555	5715	[[114, 555], [975, 5715]]	0.0869625
Bin1_1-499	346	2583	669	6690	51.719	38.6099	1.34	323	4107	[[346, 323], [2583, 4107]]	6.61003e-11	****
Bin2_500-4999	194	2454	669	6690	28.9985	36.6816	0.79	475	4236	[[194, 475], [2454, 4236]]	6.99346e-05	****
Bin3_5000-49999	9	248	669	6690	1.34529	3.70703	0.36	660	6442	[[9, 660], [248, 6442]]	0.000574299	***
Bin4_50000-499999	6	77	669	6690	0.896861	1.15097	0.78	663	6613	[[6, 663], [77, 6613]]	0.701431
Endogenous_retroviruses_Bin0	58	591	669	6690	8.66966	8.83408	0.98	611	6099	[[58, 611], [591, 6099]]	0.943036
Bin1_1-499	99	853	669	6690	14.7982	12.7504	1.16	570	5837	[[99, 570], [853, 5837]]	0.131276
Bin2_500-4999	301	3179	669	6690	44.9925	47.5187	0.95	368	3511	[[301, 368], [3179, 3511]]	0.223131
Bin3_5000-49999	203	1567	669	6690	30.3438	23.423	1.3	466	5123	[[203, 466], [1567, 5123]]	9.73737e-05	****
Bin4_50000-499999	8	87	669	6690	1.19581	1.30045	0.92	661	6603	[[8, 661], [87, 6603]]	1
LADs_Bin0	192	2546	669	6690	28.6996	38.0568	0.75	477	4144	[[192, 477], [2546, 4144]]	1.34161e-06	****
Bin1_1-499	1	4	669	6690	0.149477	0.0597907	2.5	668	6686	[[1, 668], [4, 6686]]	0.379163
Bin2_500-4999	1	20	669	6690	0.149477	0.298954	0.5	668	6670	[[1, 668], [20, 6670]]	0.715805
Bin3_5000-49999	34	250	669	6690	5.08221	3.73692	1.36	635	6440	[[34, 635], [250, 6440]]	0.0915643
Bin4_50000-499999	177	1274	669	6690	26.4574	19.0433	1.39	492	5416	[[177, 492], [1274, 5416]]	8.73738e-06	****
Long_interspersed_nuclear_elements_Bin0	84	1423	669	6690	12.5561	21.2706	0.59	585	5267	[[84, 585], [1423, 5267]]	2.80533e-08	****
Bin1_1-499	191	1666	669	6690	28.5501	24.9028	1.15	478	5024	[[191, 478], [1666, 5024]]	0.0400181	*
Bin2_500-4999	355	2827	669	6690	53.0643	42.2571	1.26	314	3863	[[355, 314], [2827, 3863]]	9.57027e-08	****
Bin3_5000-49999	38	303	669	6690	5.68012	4.52915	1.25	631	6387	[[38, 631], [303, 6387]]	0.176861
Bin4_50000-499999	1	61	669	6690	0.149477	0.911809	0.16	668	6629	[[1, 668], [61, 6629]]	0.0417471	*
Low_complexity_repeats_Bin0	3	42	669	6690	0.44843	0.627803	0.71	666	6648	[[3, 666], [42, 6648]]	0.794977
Bin1_1-499	67	734	669	6690	10.0149	10.9716	0.91	602	5956	[[67, 602], [734, 5956]]	0.474452
Bin2_500-4999	348	3238	669	6690	52.0179	48.4006	1.07	321	3452	[[348, 321], [3238, 3452]]	0.0810631
Bin3_5000-49999	241	2177	669	6690	36.0239	32.5411	1.11	428	4513	[[241, 428], [2177, 4513]]	0.0698632
Bin4_50000-499999	10	83	669	6690	1.49477	1.24066	1.2	659	6607	[[10, 659], [83, 6607]]	0.583789
RefSeq_genes_Bin0	393	2822	669	6690	58.7444	42.1824	1.39	276	3868	[[393, 276], [2822, 3868]]	2.66449e-16	****
Bin1_1-499	6	34	669	6690	0.896861	0.508221	1.76	663	6656	[[6, 663], [34, 6656]]	0.172881
Bin2_500-4999	24	310	669	6690	3.58744	4.63378	0.77	645	6380	[[24, 645], [310, 6380]]	0.242434
Bin3_5000-49999	101	1161	669	6690	15.0972	17.3543	0.87	568	5529	[[101, 568], [1161, 5529]]	0.146503
Bin4_50000-499999	129	1679	669	6690	19.2825	25.0972	0.77	540	5011	[[129, 540], [1679, 5011]]	0.000810742	***
Satellite_DNA_Bin0	13	29	669	6690	1.9432	0.433483	4.48	656	6661	[[13, 656], [29, 6661]]	5.47489e-05	****
Bin1_1-499	1	4	669	6690	0.149477	0.0597907	2.5	668	6686	[[1, 668], [4, 6686]]	0.379163
Bin2_500-4999	2	29	669	6690	0.298954	0.433483	0.69	667	6661	[[2, 667], [29, 6661]]	1
Bin3_5000-49999	18	144	669	6690	2.69058	2.15247	1.25	651	6546	[[18, 651], [144, 6546]]	0.3351
Bin4_50000-499999	75	803	669	6690	11.2108	12.003	0.93	594	5887	[[75, 594], [803, 5887]]	0.573966
Simple_repeats_Bin0	33	138	669	6690	4.93274	2.06278	2.39	636	6552	[[33, 636], [138, 6552]]	3.39122e-05	****
Bin1_1-499	130	1219	669	6690	19.432	18.2212	1.07	539	5471	[[130, 539], [1219, 5471]]	0.432237
Bin2_500-4999	428	4052	669	6690	63.9761	60.568	1.06	241	2638	[[428, 241], [4052, 2638]]	0.0885195
Bin3_5000-49999	78	811	669	6690	11.6592	12.1226	0.96	591	5879	[[78, 591], [811, 5879]]	0.756099
Bin4_50000-499999	0	62	669	6690	0	0.926756	0	669	6628	[[0, 669], [62, 6628]]	0.00590269	**
Short_interspersed_nuclear_elements_Bin0	115	810	669	6690	17.1898	12.1076	1.42	554	5880	[[115, 554], [810, 5880]]	0.000293992	***
Bin1_1-499	261	2273	669	6690	39.0135	33.9761	1.15	408	4417	[[261, 408], [2273, 4417]]	0.0104091	*
Bin2_500-4999	266	2868	669	6690	39.7608	42.87	0.93	403	3822	[[266, 403], [2868, 3822]]	0.129202
Bin3_5000-49999	20	251	669	6690	2.98954	3.75187	0.8	649	6439	[[20, 649], [251, 6439]]	0.388228
Bin4_50000-499999	7	76	669	6690	1.04634	1.13602	0.92	662	6614	[[7, 662], [76, 6614]]	1
Transcription_start_sites_Bin0	0	1	669	6690	0	0.0149477	0	669	6689	[[0, 669], [1, 6689]]	1
Bin1_1-499	6	75	669	6690	0.896861	1.12108	0.8	663	6615	[[6, 663], [75, 6615]]	0.844879
Bin2_500-4999	109	648	669	6690	16.293	9.6861	1.68	560	6042	[[109, 560], [648, 6042]]	4.61139e-07	****
Bin3_5000-49999	311	2590	669	6690	46.4873	38.7145	1.2	358	4100	[[311, 358], [2590, 4100]]	0.000111418	***
Bin4_50000-499999	223	2627	669	6690	33.3333	39.2676	0.85	446	4063	[[223, 446], [2627, 4063]]	0.00271003	**
UCSC_genes_Bin0	394	2861	669	6690	58.8939	42.7653	1.38	275	3829	[[394, 275], [2861, 3829]]	1.60714e-15	****
Bin1_1-499	5	36	669	6690	0.747384	0.538117	1.39	664	6654	[[5, 664], [36, 6654]]	0.416903
Bin2_500-4999	23	318	669	6690	3.43797	4.75336	0.72	646	6372	[[23, 646], [318, 6372]]	0.146993
Bin3_5000-49999	100	1109	669	6690	14.9477	16.577	0.9	569	5581	[[100, 569], [1109, 5581]]	0.298545
Bin4_50000-499999	130	1674	669	6690	19.432	25.0224	0.78	539	5016	[[130, 539], [1674, 5016]]	0.00113889	**

## Sheet: NRLIC+RLIC vs PIC Genomic
Features	NRLIC+RLIC	PIC	NRLIC+RLICtotal	PICtotal	NRLIC+RLIC %	PIC %	fold	NRLIC+RLIC_diff	PIC_diff	Table1	fisher	sig_rank
CpG_Islands_Bin0	3	3	822	950	0.364964	0.315789	1.16	819	947	[[3, 819], [3, 947]]	1
Bin1_1-499	9	9	822	950	1.09489	0.947368	1.16	813	941	[[9, 813], [9, 941]]	0.815046
Bin2_500-4999	88	140	822	950	10.7056	14.7368	0.73	734	810	[[88, 734], [140, 810]]	0.0126927	*
Bin3_5000-49999	359	532	822	950	43.674	56	0.78	463	418	[[359, 463], [532, 418]]	2.60066e-07	****
Bin4_50000-499999	308	245	822	950	37.4696	25.7895	1.45	514	705	[[308, 514], [245, 705]]	1.48946e-07	****
DHS_Bin0	148	187	822	950	18.0049	19.6842	0.91	674	763	[[148, 674], [187, 763]]	0.394494
Bin1_1-499	426	499	822	950	51.8248	52.5263	0.99	396	451	[[426, 396], [499, 451]]	0.774982
Bin2_500-4999	231	258	822	950	28.1022	27.1579	1.03	591	692	[[231, 591], [258, 692]]	0.670116
Bin3_5000-49999	10	5	822	950	1.21655	0.526316	2.31	812	945	[[10, 812], [5, 945]]	0.126184
Bin4_50000-499999	7	1	822	950	0.851582	0.105263	8.09	815	949	[[7, 815], [1, 949]]	0.0284683	*
Endogenous_retroviruses_Bin0	69	51	822	950	8.39416	5.36842	1.56	753	899	[[69, 753], [51, 899]]	0.01349	*
Bin1_1-499	122	88	822	950	14.8418	9.26316	1.6	700	862	[[122, 700], [88, 862]]	0.000385043	***
Bin2_500-4999	360	339	822	950	43.7956	35.6842	1.23	462	611	[[360, 462], [339, 611]]	0.000538184	***
Bin3_5000-49999	262	462	822	950	31.8735	48.6316	0.66	560	488	[[262, 560], [462, 488]]	9.19318e-13	****
Bin4_50000-499999	9	10	822	950	1.09489	1.05263	1.04	813	940	[[9, 813], [10, 940]]	1
LADs_Bin0	230	135	822	950	27.9805	14.2105	1.97	592	815	[[230, 592], [135, 815]]	1.08518e-12	****
Bin1_1-499	1	1	822	950	0.121655	0.105263	1.16	821	949	[[1, 821], [1, 949]]	1
Bin2_500-4999	1	2	822	950	0.121655	0.210526	0.58	821	948	[[1, 821], [2, 948]]	1
Bin3_5000-49999	34	42	822	950	4.13625	4.42105	0.94	788	908	[[34, 788], [42, 908]]	0.814679
Bin4_50000-499999	222	218	822	950	27.0073	22.9474	1.18	600	732	[[222, 600], [218, 732]]	0.0536069
Long_interspersed_nuclear_elements_Bin0	112	167	822	950	13.6253	17.5789	0.78	710	783	[[112, 710], [167, 783]]	0.0260667	*
Bin1_1-499	229	231	822	950	27.8589	24.3158	1.15	593	719	[[229, 593], [231, 719]]	0.0923724
Bin2_500-4999	427	471	822	950	51.9465	49.5789	1.05	395	479	[[427, 395], [471, 479]]	0.340701
Bin3_5000-49999	53	81	822	950	6.44769	8.52632	0.76	769	869	[[53, 769], [81, 869]]	0.10526
Bin4_50000-499999	1	0	822	950	0.121655	0	inf	821	950	[[1, 821], [0, 950]]	0.463883
Low_complexity_repeats_Bin0	5	5	822	950	0.608273	0.526316	1.16	817	945	[[5, 817], [5, 945]]	1
Bin1_1-499	83	69	822	950	10.0973	7.26316	1.39	739	881	[[83, 739], [69, 881]]	0.0409265	*
Bin2_500-4999	416	515	822	950	50.6083	54.2105	0.93	406	435	[[416, 406], [515, 435]]	0.139247
Bin3_5000-49999	307	360	822	950	37.3479	37.8947	0.99	515	590	[[307, 515], [360, 590]]	0.844121
Bin4_50000-499999	11	1	822	950	1.3382	0.105263	12.71	811	949	[[11, 811], [1, 949]]	0.00197734	**
RefSeq_genes_Bin0	499	771	822	950	60.7056	81.1579	0.75	323	179	[[499, 323], [771, 179]]	1.49094e-21	****
Bin1_1-499	6	4	822	950	0.729927	0.421053	1.73	816	946	[[6, 816], [4, 946]]	0.528182
Bin2_500-4999	30	43	822	950	3.64964	4.52632	0.81	792	907	[[30, 792], [43, 907]]	0.402028
Bin3_5000-49999	115	76	822	950	13.9903	8	1.75	707	874	[[115, 707], [76, 874]]	5.99945e-05	****
Bin4_50000-499999	151	53	822	950	18.3698	5.57895	3.29	671	897	[[151, 671], [53, 897]]	2.30479e-17	****
Satellite_DNA_Bin0	14	2	822	950	1.70316	0.210526	8.09	808	948	[[14, 808], [2, 948]]	0.0014506	**
Bin1_1-499	1	4	822	950	0.121655	0.421053	0.29	821	946	[[1, 821], [4, 946]]	0.380814
Bin2_500-4999	2	5	822	950	0.243309	0.526316	0.46	820	945	[[2, 820], [5, 945]]	0.460747
Bin3_5000-49999	23	31	822	950	2.79805	3.26316	0.86	799	919	[[23, 799], [31, 919]]	0.583106
Bin4_50000-499999	106	141	822	950	12.8954	14.8421	0.87	716	809	[[106, 716], [141, 809]]	0.243181
Simple_repeats_Bin0	39	37	822	950	4.74453	3.89474	1.22	783	913	[[39, 783], [37, 913]]	0.411393
Bin1_1-499	174	195	822	950	21.1679	20.5263	1.03	648	755	[[174, 648], [195, 755]]	0.769366
Bin2_500-4999	513	620	822	950	62.4088	65.2632	0.96	309	330	[[513, 309], [620, 330]]	0.215328
Bin3_5000-49999	96	98	822	950	11.6788	10.3158	1.13	726	852	[[96, 726], [98, 852]]	0.361272
Bin4_50000-499999	0	0	822	950	0	0	nan	822	950	[[0, 822], [0, 950]]	1
Short_interspersed_nuclear_elements_Bin0	146	177	822	950	17.7616	18.6316	0.95	676	773	[[146, 676], [177, 773]]	0.66598
Bin1_1-499	326	445	822	950	39.6594	46.8421	0.85	496	505	[[326, 496], [445, 505]]	0.00247529	**
Bin2_500-4999	315	318	822	950	38.3212	33.4737	1.14	507	632	[[315, 507], [318, 632]]	0.0368091	*
Bin3_5000-49999	27	9	822	950	3.28467	0.947368	3.47	795	941	[[27, 795], [9, 941]]	0.000572334	***
Bin4_50000-499999	8	1	822	950	0.973236	0.105263	9.25	814	949	[[8, 814], [1, 949]]	0.0147701	*
Transcription_start_sites_Bin0	0	0	822	950	0	0	nan	822	950	[[0, 822], [0, 950]]	1
Bin1_1-499	8	16	822	950	0.973236	1.68421	0.58	814	934	[[8, 814], [16, 934]]	0.221312
Bin2_500-4999	144	202	822	950	17.5182	21.2632	0.82	678	748	[[144, 678], [202, 748]]	0.0476672	*
Bin3_5000-49999	385	578	822	950	46.837	60.8421	0.77	437	372	[[385, 437], [578, 372]]	3.89403e-09	****
Bin4_50000-499999	261	152	822	950	31.7518	16	1.98	561	798	[[261, 561], [152, 798]]	5.17355e-15	****
UCSC_genes_Bin0	501	774	822	950	60.9489	81.4737	0.75	321	176	[[501, 321], [774, 176]]	1.03841e-21	****
Bin1_1-499	5	2	822	950	0.608273	0.210526	2.89	817	948	[[5, 817], [2, 948]]	0.260585
Bin2_500-4999	30	35	822	950	3.64964	3.68421	0.99	792	915	[[30, 792], [35, 915]]	1
Bin3_5000-49999	114	78	822	950	13.8686	8.21053	1.69	708	872	[[114, 708], [78, 872]]	0.000162605	***
Bin4_50000-499999	151	60	822	950	18.3698	6.31579	2.91	671	890	[[151, 671], [60, 890]]	3.89378e-15	****

## Sheet: PIC_NonB
Features	PIC	Random	PICtotal	Randomtotal	PIC %	Random %	fold	PIC_diff	Random_diff	Table1	fisher	sig_rank		PIC % sum
A_Phased_motifs_Bin0	3	37	950	9500	0.315789	0.389474	0.81	947	9463	[[3, 947], [37, 9463]]	1			11.0526
Bin1_1-49	14	113	950	9500	1.47368	1.18947	1.24	936	9387	[[14, 936], [113, 9387]]	0.436135			105
Bin2_50-99	9	119	950	9500	0.947368	1.25263	0.76	941	9381	[[9, 941], [119, 9381]]	0.534997			845
Bin3_100-149	7	141	950	9500	0.736842	1.48421	0.5	943	9359	[[7, 943], [141, 9359]]	0.0614826
Bin4_150-199	6	103	950	9500	0.631579	1.08421	0.58	944	9397	[[6, 944], [103, 9397]]	0.240034
Bin5_200-249	9	114	950	9500	0.947368	1.2	0.79	941	9386	[[9, 941], [114, 9386]]	0.634997
Bin6_250-299	11	124	950	9500	1.15789	1.30526	0.89	939	9376	[[11, 939], [124, 9376]]	0.879834
Bin7_300-349	13	118	950	9500	1.36842	1.24211	1.1	937	9382	[[13, 937], [118, 9382]]	0.758704
Bin8_350-399	13	93	950	9500	1.36842	0.978947	1.4	937	9407	[[13, 937], [93, 9407]]	0.235656
Bin9_400-449	14	97	950	9500	1.47368	1.02105	1.44	936	9403	[[14, 936], [97, 9403]]	0.184976
Bin10_450-499	6	95	950	9500	0.631579	1	0.63	944	9405	[[6, 944], [95, 9405]]	0.381606
Cruciform_motifs_Bin0	4	7	950	9500	0.421053	0.0736842	5.71	946	9493	[[4, 946], [7, 9493]]	0.0133088	*		2.84211
Bin1_1-49	5	39	950	9500	0.526316	0.410526	1.28	945	9461	[[5, 945], [39, 9461]]	0.594626			27
Bin2_50-99	1	39	950	9500	0.105263	0.410526	0.26	949	9461	[[1, 949], [39, 9461]]	0.261197			923
Bin3_100-149	2	40	950	9500	0.210526	0.421053	0.5	948	9460	[[2, 948], [40, 9460]]	0.5853
Bin4_150-199	1	31	950	9500	0.105263	0.326316	0.32	949	9469	[[1, 949], [31, 9469]]	0.359102
Bin5_200-249	2	33	950	9500	0.210526	0.347368	0.61	948	9467	[[2, 948], [33, 9467]]	0.766736
Bin6_250-299	1	29	950	9500	0.105263	0.305263	0.34	949	9471	[[1, 949], [29, 9471]]	0.517485
Bin7_300-349	3	30	950	9500	0.315789	0.315789	1	947	9470	[[3, 947], [30, 9470]]	1
Bin8_350-399	3	38	950	9500	0.315789	0.4	0.79	947	9462	[[3, 947], [38, 9462]]	1
Bin9_400-449	2	29	950	9500	0.210526	0.305263	0.69	948	9471	[[2, 948], [29, 9471]]	1
Bin10_450-499	3	40	950	9500	0.315789	0.421053	0.75	947	9460	[[3, 947], [40, 9460]]	0.794706
Direct_repeats_Bin0	18	140	950	9500	1.89474	1.47368	1.29	932	9360	[[18, 932], [140, 9360]]	0.32693			32.6316
Bin1_1-49	38	339	950	9500	4	3.56842	1.12	912	9161	[[38, 912], [339, 9161]]	0.466302			310
Bin2_50-99	35	296	950	9500	3.68421	3.11579	1.18	915	9204	[[35, 915], [296, 9204]]	0.331253			640
Bin3_100-149	31	302	950	9500	3.26316	3.17895	1.03	919	9198	[[31, 919], [302, 9198]]	0.846589
Bin4_150-199	23	235	950	9500	2.42105	2.47368	0.98	927	9265	[[23, 927], [235, 9265]]	1
Bin5_200-249	24	252	950	9500	2.52632	2.65263	0.95	926	9248	[[24, 926], [252, 9248]]	0.915509
Bin6_250-299	27	240	950	9500	2.84211	2.52632	1.12	923	9260	[[27, 923], [240, 9260]]	0.518559
Bin7_300-349	25	266	950	9500	2.63158	2.8	0.94	925	9234	[[25, 925], [266, 9234]]	0.836494
Bin8_350-399	23	226	950	9500	2.42105	2.37895	1.02	927	9274	[[23, 927], [226, 9274]]	0.911118
Bin9_400-449	35	229	950	9500	3.68421	2.41053	1.53	915	9271	[[35, 915], [229, 9271]]	0.0222425	*
Bin10_450-499	31	216	950	9500	3.26316	2.27368	1.44	919	9284	[[31, 919], [216, 9284]]	0.0717504
G-quadruplex-forming_repeats_Bin0	3	27	950	9500	0.315789	0.284211	1.11	947	9473	[[3, 947], [27, 9473]]	0.750512			7.89474
Bin1_1-49	7	95	950	9500	0.736842	1	0.74	943	9405	[[7, 943], [95, 9405]]	0.601655			75
Bin2_50-99	11	91	950	9500	1.15789	0.957895	1.21	939	9409	[[11, 939], [91, 9409]]	0.490817			875
Bin3_100-149	3	71	950	9500	0.315789	0.747368	0.42	947	9429	[[3, 947], [71, 9429]]	0.155787
Bin4_150-199	8	83	950	9500	0.842105	0.873684	0.96	942	9417	[[8, 942], [83, 9417]]	1
Bin5_200-249	7	79	950	9500	0.736842	0.831579	0.89	943	9421	[[7, 943], [79, 9421]]	1
Bin6_250-299	13	92	950	9500	1.36842	0.968421	1.41	937	9408	[[13, 937], [92, 9408]]	0.231599
Bin7_300-349	6	92	950	9500	0.631579	0.968421	0.65	944	9408	[[6, 944], [92, 9408]]	0.378566
Bin8_350-399	6	90	950	9500	0.631579	0.947368	0.67	944	9410	[[6, 944], [90, 9410]]	0.472915
Bin9_400-449	5	80	950	9500	0.526316	0.842105	0.62	945	9420	[[5, 945], [80, 9420]]	0.445333
Bin10_450-499	6	64	950	9500	0.631579	0.673684	0.94	944	9436	[[6, 944], [64, 9436]]	1
Inverted_repeats_Bin0	51	395	950	9500	5.36842	4.15789	1.29	899	9105	[[51, 899], [395, 9105]]	0.0915114			85.8947
Bin1_1-49	153	1523	950	9500	16.1053	16.0316	1	797	7977	[[153, 797], [1523, 7977]]	0.963016			816
Bin2_50-99	134	1335	950	9500	14.1053	14.0526	1	816	8165	[[134, 816], [1335, 8165]]	0.960965			134
Bin3_100-149	106	997	950	9500	11.1579	10.4947	1.06	844	8503	[[106, 844], [997, 8503]]	0.506867
Bin4_150-199	105	824	950	9500	11.0526	8.67368	1.27	845	8676	[[105, 845], [824, 8676]]	0.0166549	*
Bin5_200-249	69	723	950	9500	7.26316	7.61053	0.95	881	8777	[[69, 881], [723, 8777]]	0.747982
Bin6_250-299	54	539	950	9500	5.68421	5.67368	1	896	8961	[[54, 896], [539, 8961]]	1
Bin7_300-349	59	449	950	9500	6.21053	4.72632	1.31	891	9051	[[59, 891], [449, 9051]]	0.0476281	*
Bin8_350-399	34	395	950	9500	3.57895	4.15789	0.86	916	9105	[[34, 916], [395, 9105]]	0.440225
Bin9_400-449	33	251	950	9500	3.47368	2.64211	1.31	917	9249	[[33, 917], [251, 9249]]	0.141964
Bin10_450-499	18	270	950	9500	1.89474	2.84211	0.67	932	9230	[[18, 932], [270, 9230]]	0.0959617
Mirror_repeats_Bin0	23	260	950	9500	2.42105	2.73684	0.88	927	9240	[[23, 927], [260, 9240]]	0.674548			42.2105
Bin1_1-49	50	410	950	9500	5.26316	4.31579	1.22	900	9090	[[50, 900], [410, 9090]]	0.183856			401
Bin2_50-99	49	386	950	9500	5.15789	4.06316	1.27	901	9114	[[49, 901], [386, 9114]]	0.105998			549
Bin3_100-149	39	342	950	9500	4.10526	3.6	1.14	911	9158	[[39, 911], [342, 9158]]	0.414056
Bin4_150-199	33	316	950	9500	3.47368	3.32632	1.04	917	9184	[[33, 917], [316, 9184]]	0.776509
Bin5_200-249	38	314	950	9500	4	3.30526	1.21	912	9186	[[38, 912], [314, 9186]]	0.257407
Bin6_250-299	34	282	950	9500	3.57895	2.96842	1.21	916	9218	[[34, 916], [282, 9218]]	0.275613
Bin7_300-349	29	306	950	9500	3.05263	3.22105	0.95	921	9194	[[29, 921], [306, 9194]]	0.8471
Bin8_350-399	31	278	950	9500	3.26316	2.92632	1.12	919	9222	[[31, 919], [278, 9222]]	0.546496
Bin9_400-449	44	273	950	9500	4.63158	2.87368	1.61	906	9227	[[44, 906], [273, 9227]]	0.00516731	**
Bin10_450-499	31	287	950	9500	3.26316	3.02105	1.08	919	9213	[[31, 919], [287, 9213]]	0.691463
Short_Tandem_repeats_Bin0	18	174	950	9500	1.89474	1.83158	1.03	932	9326	[[18, 932], [174, 9326]]	0.898912			65.2632
Bin1_1-49	79	690	950	9500	8.31579	7.26316	1.14	871	8810	[[79, 871], [690, 8810]]	0.240592			620
Bin2_50-99	90	675	950	9500	9.47368	7.10526	1.33	860	8825	[[90, 860], [675, 8825]]	0.00895849	**		330
Bin3_100-149	64	612	950	9500	6.73684	6.44211	1.05	886	8888	[[64, 886], [612, 8888]]	0.729316
Bin4_150-199	70	576	950	9500	7.36842	6.06316	1.22	880	8924	[[70, 880], [576, 8924]]	0.119672
Bin5_200-249	61	473	950	9500	6.42105	4.97895	1.29	889	9027	[[61, 889], [473, 9027]]	0.0631345
Bin6_250-299	37	435	950	9500	3.89474	4.57895	0.85	913	9065	[[37, 913], [435, 9065]]	0.367679
Bin7_300-349	48	391	950	9500	5.05263	4.11579	1.23	902	9109	[[48, 902], [391, 9109]]	0.174374
Bin8_350-399	50	379	950	9500	5.26316	3.98947	1.32	900	9121	[[50, 900], [379, 9121]]	0.070977
Bin9_400-449	54	336	950	9500	5.68421	3.53684	1.61	896	9164	[[54, 896], [336, 9164]]	0.00159709	**
Bin10_450-499	49	320	950	9500	5.15789	3.36842	1.53	901	9180	[[49, 901], [320, 9180]]	0.00719602	**
Slipped_motifs_Bin0	5	37	950	9500	0.526316	0.389474	1.35	945	9463	[[5, 945], [37, 9463]]	0.4282			10.8421
Bin1_1-49	13	98	950	9500	1.36842	1.03158	1.33	937	9402	[[13, 937], [98, 9402]]	0.318718			103
Bin2_50-99	9	77	950	9500	0.947368	0.810526	1.17	941	9423	[[9, 941], [77, 9423]]	0.574869			847
Bin3_100-149	15	85	950	9500	1.57895	0.894737	1.76	935	9415	[[15, 935], [85, 9415]]	0.0518178
Bin4_150-199	3	76	950	9500	0.315789	0.8	0.39	947	9424	[[3, 947], [76, 9424]]	0.115467
Bin5_200-249	5	80	950	9500	0.526316	0.842105	0.62	945	9420	[[5, 945], [80, 9420]]	0.445333
Bin6_250-299	9	76	950	9500	0.947368	0.8	1.18	941	9424	[[9, 941], [76, 9424]]	0.570607
Bin7_300-349	7	82	950	9500	0.736842	0.863158	0.85	943	9418	[[7, 943], [82, 9418]]	0.853159
Bin8_350-399	10	81	950	9500	1.05263	0.852632	1.23	940	9419	[[10, 940], [81, 9419]]	0.466301
Bin9_400-449	14	86	950	9500	1.47368	0.905263	1.63	936	9414	[[14, 936], [86, 9414]]	0.111755
Bin10_450-499	13	80	950	9500	1.36842	0.842105	1.63	937	9420	[[13, 937], [80, 9420]]	0.102687
Triplex_motifs_Bin0	1	11	950	9500	0.105263	0.115789	0.91	949	9489	[[1, 949], [11, 9489]]	1			0.842105
Bin1_1-49	0	34	950	9500	0	0.357895	0	950	9466	[[0, 950], [34, 9466]]	0.0695677			8
Bin2_50-99	1	20	950	9500	0.105263	0.210526	0.5	949	9480	[[1, 949], [20, 9480]]	0.715929			942
Bin3_100-149	0	25	950	9500	0	0.263158	0	950	9475	[[0, 950], [25, 9475]]	0.162837
Bin4_150-199	0	25	950	9500	0	0.263158	0	950	9475	[[0, 950], [25, 9475]]	0.162837
Bin5_200-249	0	28	950	9500	0	0.294737	0	950	9472	[[0, 950], [28, 9472]]	0.174043
Bin6_250-299	0	24	950	9500	0	0.252632	0	950	9476	[[0, 950], [24, 9476]]	0.162274
Bin7_300-349	1	17	950	9500	0.105263	0.178947	0.59	949	9483	[[1, 949], [17, 9483]]	1
Bin8_350-399	1	16	950	9500	0.105263	0.168421	0.62	949	9484	[[1, 949], [16, 9484]]	1
Bin9_400-449	2	15	950	9500	0.210526	0.157895	1.33	948	9485	[[2, 948], [15, 9485]]	0.663535
Bin10_450-499	2	8	950	9500	0.210526	0.0842105	2.5	948	9492	[[2, 948], [8, 9492]]	0.22888
Z-DNA_motifs_Bin0	1	26	950	9500	0.105263	0.273684	0.38	949	9474	[[1, 949], [26, 9474]]	0.508589			9.68421
Bin1_1-49	7	95	950	9500	0.736842	1	0.74	943	9405	[[7, 943], [95, 9405]]	0.601655			92
Bin2_50-99	8	103	950	9500	0.842105	1.08421	0.78	942	9397	[[8, 942], [103, 9397]]	0.618166			858
Bin3_100-149	7	107	950	9500	0.736842	1.12632	0.65	943	9393	[[7, 943], [107, 9393]]	0.326956
Bin4_150-199	5	85	950	9500	0.526316	0.894737	0.59	945	9415	[[5, 945], [85, 9415]]	0.353673
Bin5_200-249	11	84	950	9500	1.15789	0.884211	1.31	939	9416	[[11, 939], [84, 9416]]	0.369908
Bin6_250-299	9	83	950	9500	0.947368	0.873684	1.08	941	9417	[[9, 941], [83, 9417]]	0.717969
Bin7_300-349	10	87	950	9500	1.05263	0.915789	1.15	940	9413	[[10, 940], [87, 9413]]	0.596878
Bin8_350-399	13	78	950	9500	1.36842	0.821053	1.67	937	9422	[[13, 937], [78, 9422]]	0.0963385
Bin9_400-449	14	90	950	9500	1.47368	0.947368	1.56	936	9410	[[14, 936], [90, 9410]]	0.122164
Bin10_450-499	7	87	950	9500	0.736842	0.915789	0.8	943	9413	[[7, 943], [87, 9413]]	0.718941

## Sheet: RLIC_NonB
Features	RLIC	Random	RLICtotal	Randomtotal	RLIC %	Random %	fold	RLIC_diff	Random_diff	Table1	fisher	sig_rank		RLIC % sum
A_Phased_motifs_Bin0	0	9	153	1530	0	0.588235	0	153	1521	[[0, 153], [9, 1521]]	1			11.7647
Bin1_1-49	1	16	153	1530	0.653595	1.04575	0.63	152	1514	[[1, 152], [16, 1514]]	1			18
Bin2_50-99	1	22	153	1530	0.653595	1.43791	0.45	152	1508	[[1, 152], [22, 1508]]	0.715591			135
Bin3_100-149	2	26	153	1530	1.30719	1.69935	0.77	151	1504	[[2, 151], [26, 1504]]	1
Bin4_150-199	2	13	153	1530	1.30719	0.849673	1.54	151	1517	[[2, 151], [13, 1517]]	0.639863
Bin5_200-249	2	16	153	1530	1.30719	1.04575	1.25	151	1514	[[2, 151], [16, 1514]]	0.675601
Bin6_250-299	0	12	153	1530	0	0.784314	0	153	1518	[[0, 153], [12, 1518]]	0.616389
Bin7_300-349	0	19	153	1530	0	1.24183	0	153	1511	[[0, 153], [19, 1511]]	0.407498
Bin8_350-399	3	24	153	1530	1.96078	1.56863	1.25	150	1506	[[3, 150], [24, 1506]]	0.730663
Bin9_400-449	4	14	153	1530	2.61438	0.915033	2.86	149	1516	[[4, 149], [14, 1516]]	0.0733933
Bin10_450-499	3	16	153	1530	1.96078	1.04575	1.88	150	1514	[[3, 150], [16, 1514]]	0.245656
Cruciform_motifs_Bin0	0	0	153	1530	0	0	nan	153	1530	[[0, 153], [0, 1530]]	1			3.92157
Bin1_1-49	0	8	153	1530	0	0.522876	0	153	1522	[[0, 153], [8, 1522]]	1			6
Bin2_50-99	3	11	153	1530	1.96078	0.718954	2.73	150	1519	[[3, 150], [11, 1519]]	0.127599			147
Bin3_100-149	0	5	153	1530	0	0.326797	0	153	1525	[[0, 153], [5, 1525]]	1
Bin4_150-199	0	5	153	1530	0	0.326797	0	153	1525	[[0, 153], [5, 1525]]	1
Bin5_200-249	1	3	153	1530	0.653595	0.196078	3.33	152	1527	[[1, 152], [3, 1527]]	0.31723
Bin6_250-299	0	5	153	1530	0	0.326797	0	153	1525	[[0, 153], [5, 1525]]	1
Bin7_300-349	2	6	153	1530	1.30719	0.392157	3.33	151	1524	[[2, 151], [6, 1524]]	0.159974
Bin8_350-399	0	6	153	1530	0	0.392157	0	153	1524	[[0, 153], [6, 1524]]	1
Bin9_400-449	0	3	153	1530	0	0.196078	0	153	1527	[[0, 153], [3, 1527]]	1
Bin10_450-499	0	5	153	1530	0	0.326797	0	153	1525	[[0, 153], [5, 1525]]	1
Direct_repeats_Bin0	2	18	153	1530	1.30719	1.17647	1.11	151	1512	[[2, 151], [18, 1512]]	0.702381			40.5229
Bin1_1-49	17	38	153	1530	11.1111	2.48366	4.47	136	1492	[[17, 136], [38, 1492]]	2.72e-06	****		62
Bin2_50-99	7	57	153	1530	4.57516	3.72549	1.23	146	1473	[[7, 146], [57, 1473]]	0.512198			91
Bin3_100-149	7	45	153	1530	4.57516	2.94118	1.56	146	1485	[[7, 146], [45, 1485]]	0.320456
Bin4_150-199	5	49	153	1530	3.26797	3.20261	1.02	148	1481	[[5, 148], [49, 1481]]	1
Bin5_200-249	2	41	153	1530	1.30719	2.67974	0.49	151	1489	[[2, 151], [41, 1489]]	0.424391
Bin6_250-299	4	43	153	1530	2.61438	2.81046	0.93	149	1487	[[4, 149], [43, 1487]]	1
Bin7_300-349	0	40	153	1530	0	2.61438	0	153	1490	[[0, 153], [40, 1490]]	0.0451178	*
Bin8_350-399	4	32	153	1530	2.61438	2.0915	1.25	149	1498	[[4, 149], [32, 1498]]	0.562757
Bin9_400-449	7	38	153	1530	4.57516	2.48366	1.84	146	1492	[[7, 146], [38, 1492]]	0.180172
Bin10_450-499	7	33	153	1530	4.57516	2.15686	2.12	146	1497	[[7, 146], [33, 1497]]	0.0855078
G-quadruplex-forming_repeats_Bin0	0	7	153	1530	0	0.457516	0	153	1523	[[0, 153], [7, 1523]]	1			8.49673
Bin1_1-49	8	10	153	1530	5.22876	0.653595	8	145	1520	[[8, 145], [10, 1520]]	7.75e-05	****		13
Bin2_50-99	0	16	153	1530	0	1.04575	0	153	1514	[[0, 153], [16, 1514]]	0.388315			140
Bin3_100-149	0	15	153	1530	0	0.980392	0	153	1515	[[0, 153], [15, 1515]]	0.387269
Bin4_150-199	0	14	153	1530	0	0.915033	0	153	1516	[[0, 153], [14, 1516]]	0.630193
Bin5_200-249	0	13	153	1530	0	0.849673	0	153	1517	[[0, 153], [13, 1517]]	0.622224
Bin6_250-299	2	16	153	1530	1.30719	1.04575	1.25	151	1514	[[2, 151], [16, 1514]]	0.675601
Bin7_300-349	1	13	153	1530	0.653595	0.849673	0.77	152	1517	[[1, 152], [13, 1517]]	1
Bin8_350-399	0	13	153	1530	0	0.849673	0	153	1517	[[0, 153], [13, 1517]]	0.622224
Bin9_400-449	2	12	153	1530	1.30719	0.784314	1.67	151	1518	[[2, 151], [12, 1518]]	0.36829
Bin10_450-499	0	9	153	1530	0	0.588235	0	153	1521	[[0, 153], [9, 1521]]	1
Inverted_repeats_Bin0	9	76	153	1530	5.88235	4.96732	1.18	144	1454	[[9, 144], [76, 1454]]	0.563508			83.6601
Bin1_1-49	19	253	153	1530	12.4183	16.5359	0.75	134	1277	[[19, 134], [253, 1277]]	0.206194			128
Bin2_50-99	25	183	153	1530	16.3399	11.9608	1.37	128	1347	[[25, 128], [183, 1347]]	0.122155			25
Bin3_100-149	15	171	153	1530	9.80392	11.1765	0.88	138	1359	[[15, 138], [171, 1359]]	0.686124
Bin4_150-199	9	126	153	1530	5.88235	8.23529	0.71	144	1404	[[9, 144], [126, 1404]]	0.352249
Bin5_200-249	9	109	153	1530	5.88235	7.12418	0.83	144	1421	[[9, 144], [109, 1421]]	0.7391
Bin6_250-299	11	89	153	1530	7.18954	5.81699	1.24	142	1441	[[11, 142], [89, 1441]]	0.473081
Bin7_300-349	15	77	153	1530	9.80392	5.03268	1.95	138	1453	[[15, 138], [77, 1453]]	0.0228712	*
Bin8_350-399	6	60	153	1530	3.92157	3.92157	1	147	1470	[[6, 147], [60, 1470]]	1
Bin9_400-449	6	47	153	1530	3.92157	3.0719	1.28	147	1483	[[6, 147], [47, 1483]]	0.474138
Bin10_450-499	4	34	153	1530	2.61438	2.22222	1.18	149	1496	[[4, 149], [34, 1496]]	0.772361
Mirror_repeats_Bin0	6	38	153	1530	3.92157	2.48366	1.58	147	1492	[[6, 147], [38, 1492]]	0.283566			43.7908
Bin1_1-49	9	42	153	1530	5.88235	2.7451	2.14	144	1488	[[9, 144], [42, 1488]]	0.0436363	*		67
Bin2_50-99	10	75	153	1530	6.53595	4.90196	1.33	143	1455	[[10, 143], [75, 1455]]	0.337316			86
Bin3_100-149	11	49	153	1530	7.18954	3.20261	2.24	142	1481	[[11, 142], [49, 1481]]	0.019447	*
Bin4_150-199	8	73	153	1530	5.22876	4.77124	1.1	145	1457	[[8, 145], [73, 1457]]	0.842086
Bin5_200-249	0	63	153	1530	0	4.11765	0	153	1467	[[0, 153], [63, 1467]]	0.00324721	**
Bin6_250-299	3	49	153	1530	1.96078	3.20261	0.61	150	1481	[[3, 150], [49, 1481]]	0.621235
Bin7_300-349	4	47	153	1530	2.61438	3.0719	0.85	149	1483	[[4, 149], [47, 1483]]	1
Bin8_350-399	7	41	153	1530	4.57516	2.67974	1.71	146	1489	[[7, 146], [41, 1489]]	0.196363
Bin9_400-449	6	47	153	1530	3.92157	3.0719	1.28	147	1483	[[6, 147], [47, 1483]]	0.474138
Bin10_450-499	3	41	153	1530	1.96078	2.67974	0.73	150	1489	[[3, 150], [41, 1489]]	0.792408
Short_Tandem_repeats_Bin0	2	19	153	1530	1.30719	1.24183	1.05	151	1511	[[2, 151], [19, 1511]]	1			66.6667
Bin1_1-49	17	108	153	1530	11.1111	7.05882	1.57	136	1422	[[17, 136], [108, 1422]]	0.0750282			102
Bin2_50-99	14	123	153	1530	9.15033	8.03922	1.14	139	1407	[[14, 139], [123, 1407]]	0.64108			51
Bin3_100-149	13	86	153	1530	8.49673	5.62092	1.51	140	1444	[[13, 140], [86, 1444]]	0.149783
Bin4_150-199	9	97	153	1530	5.88235	6.33987	0.93	144	1433	[[9, 144], [97, 1433]]	1
Bin5_200-249	3	62	153	1530	1.96078	4.05229	0.48	150	1468	[[3, 150], [62, 1468]]	0.270711
Bin6_250-299	10	64	153	1530	6.53595	4.18301	1.56	143	1466	[[10, 143], [64, 1466]]	0.209694
Bin7_300-349	5	66	153	1530	3.26797	4.31373	0.76	148	1464	[[5, 148], [66, 1464]]	0.675411
Bin8_350-399	13	54	153	1530	8.49673	3.52941	2.41	140	1476	[[13, 140], [54, 1476]]	0.00719208	**
Bin9_400-449	8	53	153	1530	5.22876	3.46405	1.51	145	1477	[[8, 145], [53, 1477]]	0.255768
Bin10_450-499	8	48	153	1530	5.22876	3.13725	1.67	145	1482	[[8, 145], [48, 1482]]	0.159154
Slipped_motifs_Bin0	0	3	153	1530	0	0.196078	0	153	1527	[[0, 153], [3, 1527]]	1			13.7255
Bin1_1-49	5	14	153	1530	3.26797	0.915033	3.57	148	1516	[[5, 148], [14, 1516]]	0.0236783	*		21
Bin2_50-99	0	22	153	1530	0	1.43791	0	153	1508	[[0, 153], [22, 1508]]	0.253797			132
Bin3_100-149	2	12	153	1530	1.30719	0.784314	1.67	151	1518	[[2, 151], [12, 1518]]	0.36829
Bin4_150-199	3	13	153	1530	1.96078	0.849673	2.31	150	1517	[[3, 150], [13, 1517]]	0.172242
Bin5_200-249	0	14	153	1530	0	0.915033	0	153	1516	[[0, 153], [14, 1516]]	0.630193
Bin6_250-299	0	14	153	1530	0	0.915033	0	153	1516	[[0, 153], [14, 1516]]	0.630193
Bin7_300-349	6	11	153	1530	3.92157	0.718954	5.45	147	1519	[[6, 147], [11, 1519]]	0.0027185	**
Bin8_350-399	1	13	153	1530	0.653595	0.849673	0.77	152	1517	[[1, 152], [13, 1517]]	1
Bin9_400-449	0	14	153	1530	0	0.915033	0	153	1516	[[0, 153], [14, 1516]]	0.630193
Bin10_450-499	4	14	153	1530	2.61438	0.915033	2.86	149	1516	[[4, 149], [14, 1516]]	0.0733933
Triplex_motifs_Bin0	0	2	153	1530	0	0.130719	0	153	1528	[[0, 153], [2, 1528]]	1			5.88235
Bin1_1-49	0	4	153	1530	0	0.261438	0	153	1526	[[0, 153], [4, 1526]]	1			9
Bin2_50-99	1	4	153	1530	0.653595	0.261438	2.5	152	1526	[[1, 152], [4, 1526]]	0.379448			144
Bin3_100-149	0	6	153	1530	0	0.392157	0	153	1524	[[0, 153], [6, 1524]]	1
Bin4_150-199	0	5	153	1530	0	0.326797	0	153	1525	[[0, 153], [5, 1525]]	1
Bin5_200-249	0	4	153	1530	0	0.261438	0	153	1526	[[0, 153], [4, 1526]]	1
Bin6_250-299	2	4	153	1530	1.30719	0.261438	5	151	1526	[[2, 151], [4, 1526]]	0.0965387
Bin7_300-349	1	4	153	1530	0.653595	0.261438	2.5	152	1526	[[1, 152], [4, 1526]]	0.379448
Bin8_350-399	2	2	153	1530	1.30719	0.130719	10	151	1528	[[2, 151], [2, 1528]]	0.0435859	*
Bin9_400-449	3	4	153	1530	1.96078	0.261438	7.5	150	1526	[[3, 150], [4, 1526]]	0.0196116	*
Bin10_450-499	0	2	153	1530	0	0.130719	0	153	1528	[[0, 153], [2, 1528]]	1
Z-DNA_motifs_Bin0	0	6	153	1530	0	0.392157	0	153	1524	[[0, 153], [6, 1524]]	1			22.2222
Bin1_1-49	9	22	153	1530	5.88235	1.43791	4.09	144	1508	[[9, 144], [22, 1508]]	0.0011765	**		34
Bin2_50-99	2	12	153	1530	1.30719	0.784314	1.67	151	1518	[[2, 151], [12, 1518]]	0.36829			119
Bin3_100-149	3	22	153	1530	1.96078	1.43791	1.36	150	1508	[[3, 150], [22, 1508]]	0.491103
Bin4_150-199	0	10	153	1530	0	0.653595	0	153	1520	[[0, 153], [10, 1520]]	0.613215
Bin5_200-249	1	20	153	1530	0.653595	1.30719	0.5	152	1510	[[1, 152], [20, 1510]]	0.714372
Bin6_250-299	2	21	153	1530	1.30719	1.37255	0.95	151	1509	[[2, 151], [21, 1509]]	1
Bin7_300-349	5	18	153	1530	3.26797	1.17647	2.78	148	1512	[[5, 148], [18, 1512]]	0.0510084
Bin8_350-399	7	14	153	1530	4.57516	0.915033	5	146	1516	[[7, 146], [14, 1516]]	0.00174384	**
Bin9_400-449	5	22	153	1530	3.26797	1.43791	2.27	148	1508	[[5, 148], [22, 1508]]	0.0913953
Bin10_450-499	0	15	153	1530	0	0.980392	0	153	1515	[[0, 153], [15, 1515]]	0.387269

## Sheet: NRLIC_NonB
Features	NRLIC	Random	NRLICtotal	Randomtotal	NRLIC %	Random %	fold	NRLIC_diff	Random_diff	Table1	fisher	sig_rank		NRLIC % sum
A_Phased_motifs_Bin0	1	18	669	6690	0.149477	0.269058	0.56	668	6672	[[1, 668], [18, 6672]]	1			11.8087
Bin1_1-49	5	81	669	6690	0.747384	1.21076	0.62	664	6609	[[5, 664], [81, 6609]]	0.348995			79
Bin2_50-99	2	85	669	6690	0.298954	1.27055	0.24	667	6605	[[2, 667], [85, 6605]]	0.0225474	*		590
Bin3_100-149	13	79	669	6690	1.9432	1.18087	1.65	656	6611	[[13, 656], [79, 6611]]	0.0987673
Bin4_150-199	5	62	669	6690	0.747384	0.926756	0.81	664	6628	[[5, 664], [62, 6628]]	0.83105
Bin5_200-249	12	75	669	6690	1.79372	1.12108	1.6	657	6615	[[12, 657], [75, 6615]]	0.13144
Bin6_250-299	12	76	669	6690	1.79372	1.13602	1.58	657	6614	[[12, 657], [76, 6614]]	0.135399
Bin7_300-349	5	71	669	6690	0.747384	1.06129	0.7	664	6619	[[5, 664], [71, 6619]]	0.550612
Bin8_350-399	8	82	669	6690	1.19581	1.22571	0.98	661	6608	[[8, 661], [82, 6608]]	1
Bin9_400-449	8	82	669	6690	1.19581	1.22571	0.98	661	6608	[[8, 661], [82, 6608]]	1
Bin10_450-499	8	80	669	6690	1.19581	1.19581	1	661	6610	[[8, 661], [80, 6610]]	1
Cruciform_motifs_Bin0	0	7	669	6690	0	0.104634	0	669	6683	[[0, 669], [7, 6683]]	1			4.18535
Bin1_1-49	1	21	669	6690	0.149477	0.313901	0.48	668	6669	[[1, 668], [21, 6669]]	0.715801			28
Bin2_50-99	2	24	669	6690	0.298954	0.358744	0.83	667	6666	[[2, 667], [24, 6666]]	1			641
Bin3_100-149	1	24	669	6690	0.149477	0.358744	0.42	668	6666	[[1, 668], [24, 6666]]	0.722709
Bin4_150-199	6	33	669	6690	0.896861	0.493274	1.82	663	6657	[[6, 663], [33, 6657]]	0.162362
Bin5_200-249	1	26	669	6690	0.149477	0.38864	0.38	668	6664	[[1, 668], [26, 6664]]	0.508351
Bin6_250-299	3	16	669	6690	0.44843	0.239163	1.88	666	6674	[[3, 666], [16, 6674]]	0.246099
Bin7_300-349	4	24	669	6690	0.597907	0.358744	1.67	665	6666	[[4, 665], [24, 6666]]	0.315963
Bin8_350-399	7	32	669	6690	1.04634	0.478326	2.19	662	6658	[[7, 662], [32, 6658]]	0.0831188
Bin9_400-449	2	22	669	6690	0.298954	0.328849	0.91	667	6668	[[2, 667], [22, 6668]]	1
Bin10_450-499	1	23	669	6690	0.149477	0.343797	0.43	668	6667	[[1, 668], [23, 6667]]	0.719373
Direct_repeats_Bin0	12	98	669	6690	1.79372	1.46487	1.22	657	6592	[[12, 657], [98, 6592]]	0.502			33.4828
Bin1_1-49	38	210	669	6690	5.68012	3.13901	1.81	631	6480	[[38, 631], [210, 6480]]	0.00147308	**		224
Bin2_50-99	25	211	669	6690	3.73692	3.15396	1.18	644	6479	[[25, 644], [211, 6479]]	0.41953			445
Bin3_100-149	16	215	669	6690	2.39163	3.21375	0.74	653	6475	[[16, 653], [215, 6475]]	0.294598
Bin4_150-199	20	213	669	6690	2.98954	3.18386	0.94	649	6477	[[20, 649], [213, 6477]]	0.907718
Bin5_200-249	20	183	669	6690	2.98954	2.73543	1.09	649	6507	[[20, 649], [183, 6507]]	0.70967
Bin6_250-299	24	188	669	6690	3.58744	2.81016	1.28	645	6502	[[24, 645], [188, 6502]]	0.273605
Bin7_300-349	18	167	669	6690	2.69058	2.49626	1.08	651	6523	[[18, 651], [167, 6523]]	0.69868
Bin8_350-399	19	161	669	6690	2.84006	2.40658	1.18	650	6529	[[19, 650], [161, 6529]]	0.510222
Bin9_400-449	16	149	669	6690	2.39163	2.2272	1.07	653	6541	[[16, 653], [149, 6541]]	0.783575
Bin10_450-499	16	160	669	6690	2.39163	2.39163	1	653	6530	[[16, 653], [160, 6530]]	1
G-quadruplex-forming_repeats_Bin0	5	28	669	6690	0.747384	0.418535	1.79	664	6662	[[5, 664], [28, 6662]]	0.21874			11.5097
Bin1_1-49	8	76	669	6690	1.19581	1.13602	1.05	661	6614	[[8, 661], [76, 6614]]	0.848222			77
Bin2_50-99	5	50	669	6690	0.747384	0.747384	1	664	6640	[[5, 664], [50, 6640]]	1			592
Bin3_100-149	8	55	669	6690	1.19581	0.822123	1.45	661	6635	[[8, 661], [55, 6635]]	0.275831
Bin4_150-199	10	51	669	6690	1.49477	0.762332	1.96	659	6639	[[10, 659], [51, 6639]]	0.0676542
Bin5_200-249	7	68	669	6690	1.04634	1.01644	1.03	662	6622	[[7, 662], [68, 6622]]	0.841049
Bin6_250-299	5	71	669	6690	0.747384	1.06129	0.7	664	6619	[[5, 664], [71, 6619]]	0.550612
Bin7_300-349	5	70	669	6690	0.747384	1.04634	0.71	664	6620	[[5, 664], [70, 6620]]	0.68418
Bin8_350-399	12	41	669	6690	1.79372	0.612855	2.93	657	6649	[[12, 657], [41, 6649]]	0.00235676	**
Bin9_400-449	6	53	669	6690	0.896861	0.792227	1.13	663	6637	[[6, 663], [53, 6637]]	0.65379
Bin10_450-499	6	49	669	6690	0.896861	0.732436	1.22	663	6641	[[6, 663], [49, 6641]]	0.634503
Inverted_repeats_Bin0	42	335	669	6690	6.27803	5.00747	1.25	627	6355	[[42, 627], [335, 6355]]	0.166926			84.7534
Bin1_1-49	112	1035	669	6690	16.7414	15.4709	1.08	557	5655	[[112, 557], [1035, 5655]]	0.401646			567
Bin2_50-99	90	897	669	6690	13.4529	13.4081	1	579	5793	[[90, 579], [897, 5793]]	0.952607			102
Bin3_100-149	74	739	669	6690	11.0613	11.0463	1	595	5951	[[74, 595], [739, 5951]]	1
Bin4_150-199	55	630	669	6690	8.22123	9.41704	0.87	614	6060	[[55, 614], [630, 6060]]	0.329182
Bin5_200-249	47	454	669	6690	7.02541	6.78625	1.04	622	6236	[[47, 622], [454, 6236]]	0.809118
Bin6_250-299	52	369	669	6690	7.7728	5.5157	1.41	617	6321	[[52, 617], [369, 6321]]	0.0227212	*
Bin7_300-349	33	321	669	6690	4.93274	4.79821	1.03	636	6369	[[33, 636], [321, 6369]]	0.84977
Bin8_350-399	18	284	669	6690	2.69058	4.24514	0.63	651	6406	[[18, 651], [284, 6406]]	0.0521626
Bin9_400-449	25	182	669	6690	3.73692	2.72048	1.37	644	6508	[[25, 644], [182, 6508]]	0.139829
Bin10_450-499	19	163	669	6690	2.84006	2.43647	1.17	650	6527	[[19, 650], [163, 6527]]	0.51313
Mirror_repeats_Bin0	21	188	669	6690	3.13901	2.81016	1.12	648	6502	[[21, 648], [188, 6502]]	0.62467			36.7713
Bin1_1-49	32	270	669	6690	4.78326	4.03587	1.19	637	6420	[[32, 637], [270, 6420]]	0.356951			246
Bin2_50-99	26	251	669	6690	3.8864	3.75187	1.04	643	6439	[[26, 643], [251, 6439]]	0.83134			423
Bin3_100-149	22	278	669	6690	3.28849	4.15546	0.79	647	6412	[[22, 647], [278, 6412]]	0.30638
Bin4_150-199	27	254	669	6690	4.03587	3.79671	1.06	642	6436	[[27, 642], [254, 6436]]	0.750682
Bin5_200-249	25	244	669	6690	3.73692	3.64723	1.02	644	6446	[[25, 644], [244, 6446]]	0.913818
Bin6_250-299	13	224	669	6690	1.9432	3.34828	0.58	656	6466	[[13, 656], [224, 6466]]	0.0503812
Bin7_300-349	17	224	669	6690	2.54111	3.34828	0.76	652	6466	[[17, 652], [224, 6466]]	0.305265
Bin8_350-399	23	210	669	6690	3.43797	3.13901	1.1	646	6480	[[23, 646], [210, 6480]]	0.643392
Bin9_400-449	22	184	669	6690	3.28849	2.75037	1.2	647	6506	[[22, 647], [184, 6506]]	0.390739
Bin10_450-499	18	186	669	6690	2.69058	2.78027	0.97	651	6504	[[18, 651], [186, 6504]]	1
Short_Tandem_repeats_Bin0	11	110	669	6690	1.64425	1.64425	1	658	6580	[[11, 658], [110, 6580]]	1			57.6981
Bin1_1-49	61	509	669	6690	9.11809	7.60837	1.2	608	6181	[[61, 608], [509, 6181]]	0.171757			386
Bin2_50-99	46	473	669	6690	6.87593	7.07025	0.97	623	6217	[[46, 623], [473, 6217]]	0.936855			283
Bin3_100-149	43	465	669	6690	6.4275	6.95067	0.92	626	6225	[[43, 626], [465, 6225]]	0.689069
Bin4_150-199	38	390	669	6690	5.68012	5.8296	0.97	631	6300	[[38, 631], [390, 6300]]	0.931108
Bin5_200-249	38	357	669	6690	5.68012	5.33632	1.06	631	6333	[[38, 631], [357, 6333]]	0.718656
Bin6_250-299	38	325	669	6690	5.68012	4.858	1.17	631	6365	[[38, 631], [325, 6365]]	0.348758
Bin7_300-349	34	292	669	6690	5.08221	4.36472	1.16	635	6398	[[34, 635], [292, 6398]]	0.375438
Bin8_350-399	29	249	669	6690	4.33483	3.72197	1.16	640	6441	[[29, 640], [249, 6441]]	0.396334
Bin9_400-449	29	236	669	6690	4.33483	3.52765	1.23	640	6454	[[29, 640], [236, 6454]]	0.276639
Bin10_450-499	19	223	669	6690	2.84006	3.33333	0.85	650	6467	[[19, 650], [223, 6467]]	0.569999
Slipped_motifs_Bin0	4	25	669	6690	0.597907	0.373692	1.6	665	6665	[[4, 665], [25, 6665]]	0.330348			10.0149
Bin1_1-49	6	49	669	6690	0.896861	0.732436	1.22	663	6641	[[6, 663], [49, 6641]]	0.634503			67
Bin2_50-99	7	68	669	6690	1.04634	1.01644	1.03	662	6622	[[7, 662], [68, 6622]]	0.841049			602
Bin3_100-149	7	55	669	6690	1.04634	0.822123	1.27	662	6635	[[7, 662], [55, 6635]]	0.50461
Bin4_150-199	6	61	669	6690	0.896861	0.911809	0.98	663	6629	[[6, 663], [61, 6629]]	1
Bin5_200-249	6	57	669	6690	0.896861	0.852018	1.05	663	6633	[[6, 663], [57, 6633]]	0.825977
Bin6_250-299	10	55	669	6690	1.49477	0.822123	1.82	659	6635	[[10, 659], [55, 6635]]	0.0822907
Bin7_300-349	5	47	669	6690	0.747384	0.702541	1.06	664	6643	[[5, 664], [47, 6643]]	0.808907
Bin8_350-399	9	59	669	6690	1.34529	0.881913	1.53	660	6631	[[9, 660], [59, 6631]]	0.207564
Bin9_400-449	3	39	669	6690	0.44843	0.58296	0.77	666	6651	[[3, 666], [39, 6651]]	1
Bin10_450-499	4	57	669	6690	0.597907	0.852018	0.7	665	6633	[[4, 665], [57, 6633]]	0.655249
Triplex_motifs_Bin0	0	11	669	6690	0	0.164425	0	669	6679	[[0, 669], [11, 6679]]	0.614168			1.9432
Bin1_1-49	3	24	669	6690	0.44843	0.358744	1.25	666	6666	[[3, 666], [24, 6666]]	0.731901			13
Bin2_50-99	1	10	669	6690	0.149477	0.149477	1	668	6680	[[1, 668], [10, 6680]]	1			656
Bin3_100-149	0	19	669	6690	0	0.284006	0	669	6671	[[0, 669], [19, 6671]]	0.409226
Bin4_150-199	3	16	669	6690	0.44843	0.239163	1.88	666	6674	[[3, 666], [16, 6674]]	0.246099
Bin5_200-249	1	5	669	6690	0.149477	0.0747384	2	668	6685	[[1, 668], [5, 6685]]	0.435641
Bin6_250-299	1	10	669	6690	0.149477	0.149477	1	668	6680	[[1, 668], [10, 6680]]	1
Bin7_300-349	0	18	669	6690	0	0.269058	0	669	6672	[[0, 669], [18, 6672]]	0.400546
Bin8_350-399	1	14	669	6690	0.149477	0.209268	0.71	668	6676	[[1, 668], [14, 6676]]	1
Bin9_400-449	2	19	669	6690	0.298954	0.284006	1.05	667	6671	[[2, 667], [19, 6671]]	1
Bin10_450-499	1	15	669	6690	0.149477	0.224215	0.67	668	6675	[[1, 668], [15, 6675]]	1
Z-DNA_motifs_Bin0	3	14	669	6690	0.44843	0.209268	2.14	666	6676	[[3, 666], [14, 6676]]	0.196586			10.4634
Bin1_1-49	11	72	669	6690	1.64425	1.07623	1.53	658	6618	[[11, 658], [72, 6618]]	0.178795			70
Bin2_50-99	8	97	669	6690	1.19581	1.44993	0.82	661	6593	[[8, 661], [97, 6593]]	0.732769			599
Bin3_100-149	11	72	669	6690	1.64425	1.07623	1.53	658	6618	[[11, 658], [72, 6618]]	0.178795
Bin4_150-199	5	62	669	6690	0.747384	0.926756	0.81	664	6628	[[5, 664], [62, 6628]]	0.83105
Bin5_200-249	5	68	669	6690	0.747384	1.01644	0.74	664	6622	[[5, 664], [68, 6622]]	0.681568
Bin6_250-299	6	74	669	6690	0.896861	1.10613	0.81	663	6616	[[6, 663], [74, 6616]]	0.844106
Bin7_300-349	5	62	669	6690	0.747384	0.926756	0.81	664	6628	[[5, 664], [62, 6628]]	0.83105
Bin8_350-399	6	59	669	6690	0.896861	0.881913	1.02	663	6631	[[6, 663], [59, 6631]]	1
Bin9_400-449	6	60	669	6690	0.896861	0.896861	1	663	6630	[[6, 663], [60, 6630]]	1
Bin10_450-499	4	73	669	6690	0.597907	1.09118	0.55	665	6617	[[4, 665], [73, 6617]]	0.31723

## Sheet: NRLIC+RLIC vs PIC_NonB
Features	NRLIC+RLIC	PIC	NRLIC+RLICtotal	PICtotal	NRLIC+RLIC %	PIC %	fold	NRLIC+RLIC_diff	PIC_diff	Table1	fisher	sig_rank		NRLIC+RLIC % sum
A_Phased_motifs_Bin0	1	3	822	950	0.121655	0.315789	0.39	821	947	[[1, 821], [3, 947]]	0.628488			11.8005
Bin1_1-49	6	14	822	950	0.729927	1.47368	0.5	816	936	[[6, 816], [14, 936]]	0.177169			97
Bin2_50-99	3	9	822	950	0.364964	0.947368	0.39	819	941	[[3, 819], [9, 941]]	0.157237			725
Bin3_100-149	15	7	822	950	1.82482	0.736842	2.48	807	943	[[15, 807], [7, 943]]	0.0514152
Bin4_150-199	7	6	822	950	0.851582	0.631579	1.35	815	944	[[7, 815], [6, 944]]	0.592417
Bin5_200-249	14	9	822	950	1.70316	0.947368	1.8	808	941	[[14, 808], [9, 941]]	0.206743
Bin6_250-299	12	11	822	950	1.45985	1.15789	1.26	810	939	[[12, 810], [11, 939]]	0.67528
Bin7_300-349	5	13	822	950	0.608273	1.36842	0.44	817	937	[[5, 817], [13, 937]]	0.153437
Bin8_350-399	11	13	822	950	1.3382	1.36842	0.98	811	937	[[11, 811], [13, 937]]	1
Bin9_400-449	12	14	822	950	1.45985	1.47368	0.99	810	936	[[12, 810], [14, 936]]	1
Bin10_450-499	11	6	822	950	1.3382	0.631579	2.12	811	944	[[11, 811], [6, 944]]	0.14721
Cruciform_motifs_Bin0	0	4	822	950	0	0.421053	0	822	946	[[0, 822], [4, 946]]	0.128493			4.13625
Bin1_1-49	1	5	822	950	0.121655	0.526316	0.23	821	945	[[1, 821], [5, 945]]	0.225293			34
Bin2_50-99	5	1	822	950	0.608273	0.105263	5.78	817	949	[[5, 817], [1, 949]]	0.102277			788
Bin3_100-149	1	2	822	950	0.121655	0.210526	0.58	821	948	[[1, 821], [2, 948]]	1
Bin4_150-199	6	1	822	950	0.729927	0.105263	6.93	816	949	[[6, 816], [1, 949]]	0.0543135
Bin5_200-249	2	2	822	950	0.243309	0.210526	1.16	820	948	[[2, 820], [2, 948]]	1
Bin6_250-299	3	1	822	950	0.364964	0.105263	3.47	819	949	[[3, 819], [1, 949]]	0.342501
Bin7_300-349	6	3	822	950	0.729927	0.315789	2.31	816	947	[[6, 816], [3, 947]]	0.317678
Bin8_350-399	7	3	822	950	0.851582	0.315789	2.7	815	947	[[7, 815], [3, 947]]	0.202746
Bin9_400-449	2	2	822	950	0.243309	0.210526	1.16	820	948	[[2, 820], [2, 948]]	1
Bin10_450-499	1	3	822	950	0.121655	0.315789	0.39	821	947	[[1, 821], [3, 947]]	0.628488
Direct_repeats_Bin0	14	18	822	950	1.70316	1.89474	0.9	808	932	[[14, 808], [18, 932]]	0.858716			34.7932
Bin1_1-49	55	38	822	950	6.691	4	1.67	767	912	[[55, 767], [38, 912]]	0.0136985	*		286
Bin2_50-99	32	35	822	950	3.89294	3.68421	1.06	790	915	[[32, 790], [35, 915]]	0.900743			536
Bin3_100-149	23	31	822	950	2.79805	3.26316	0.86	799	919	[[23, 799], [31, 919]]	0.583106
Bin4_150-199	25	23	822	950	3.04136	2.42105	1.26	797	927	[[25, 797], [23, 927]]	0.46463
Bin5_200-249	22	24	822	950	2.6764	2.52632	1.06	800	926	[[22, 800], [24, 926]]	0.881618
Bin6_250-299	28	27	822	950	3.40633	2.84211	1.2	794	923	[[28, 794], [27, 923]]	0.496389
Bin7_300-349	18	25	822	950	2.18978	2.63158	0.83	804	925	[[18, 804], [25, 925]]	0.642993
Bin8_350-399	23	23	822	950	2.79805	2.42105	1.16	799	927	[[23, 799], [23, 927]]	0.654971
Bin9_400-449	23	35	822	950	2.79805	3.68421	0.76	799	915	[[23, 799], [35, 915]]	0.349075
Bin10_450-499	23	31	822	950	2.79805	3.26316	0.86	799	919	[[23, 799], [31, 919]]	0.583106
G-quadruplex-forming_repeats_Bin0	5	3	822	950	0.608273	0.315789	1.93	817	947	[[5, 817], [3, 947]]	0.483657			10.9489
Bin1_1-49	16	7	822	950	1.94647	0.736842	2.64	806	943	[[16, 806], [7, 943]]	0.0336181	*		90
Bin2_50-99	5	11	822	950	0.608273	1.15789	0.53	817	939	[[5, 817], [11, 939]]	0.314607			732
Bin3_100-149	8	3	822	950	0.973236	0.315789	3.08	814	947	[[8, 814], [3, 947]]	0.12637
Bin4_150-199	10	8	822	950	1.21655	0.842105	1.44	812	942	[[10, 812], [8, 942]]	0.482134
Bin5_200-249	7	7	822	950	0.851582	0.736842	1.16	815	943	[[7, 815], [7, 943]]	0.795042
Bin6_250-299	7	13	822	950	0.851582	1.36842	0.62	815	937	[[7, 815], [13, 937]]	0.37056
Bin7_300-349	6	6	822	950	0.729927	0.631579	1.16	816	944	[[6, 816], [6, 944]]	1
Bin8_350-399	12	6	822	950	1.45985	0.631579	2.31	810	944	[[12, 810], [6, 944]]	0.0982531
Bin9_400-449	8	5	822	950	0.973236	0.526316	1.85	814	945	[[8, 814], [5, 945]]	0.403574
Bin10_450-499	6	6	822	950	0.729927	0.631579	1.16	816	944	[[6, 816], [6, 944]]	1
Inverted_repeats_Bin0	51	51	822	950	6.20438	5.36842	1.16	771	899	[[51, 771], [51, 899]]	0.475024			84.5499
Bin1_1-49	131	153	822	950	15.9367	16.1053	0.99	691	797	[[131, 691], [153, 797]]	0.948279			695
Bin2_50-99	115	134	822	950	13.9903	14.1053	0.99	707	816	[[115, 707], [134, 816]]	1			127
Bin3_100-149	89	106	822	950	10.8273	11.1579	0.97	733	844	[[89, 733], [106, 844]]	0.879062
Bin4_150-199	64	105	822	950	7.78589	11.0526	0.7	758	845	[[64, 758], [105, 845]]	0.022957	*
Bin5_200-249	56	69	822	950	6.81265	7.26316	0.94	766	881	[[56, 766], [69, 881]]	0.780324
Bin6_250-299	63	54	822	950	7.66423	5.68421	1.35	759	896	[[63, 759], [54, 896]]	0.103096
Bin7_300-349	48	59	822	950	5.83942	6.21053	0.94	774	891	[[48, 774], [59, 891]]	0.765047
Bin8_350-399	24	34	822	950	2.91971	3.57895	0.82	798	916	[[24, 798], [34, 916]]	0.503859
Bin9_400-449	31	33	822	950	3.77129	3.47368	1.09	791	917	[[31, 791], [33, 917]]	0.798863
Bin10_450-499	23	18	822	950	2.79805	1.89474	1.48	799	932	[[23, 799], [18, 932]]	0.267229
Mirror_repeats_Bin0	27	23	822	950	3.28467	2.42105	1.36	795	927	[[27, 795], [23, 927]]	0.314584			38.0779
Bin1_1-49	41	50	822	950	4.98783	5.26316	0.95	781	900	[[41, 781], [50, 900]]	0.829654			313
Bin2_50-99	36	49	822	950	4.37956	5.15789	0.85	786	901	[[36, 786], [49, 901]]	0.503977			509
Bin3_100-149	33	39	822	950	4.0146	4.10526	0.98	789	911	[[33, 789], [39, 911]]	1
Bin4_150-199	35	33	822	950	4.25791	3.47368	1.23	787	917	[[35, 787], [33, 917]]	0.457153
Bin5_200-249	25	38	822	950	3.04136	4	0.76	797	912	[[25, 797], [38, 912]]	0.304853
Bin6_250-299	16	34	822	950	1.94647	3.57895	0.54	806	916	[[16, 806], [34, 916]]	0.043764	*
Bin7_300-349	21	29	822	950	2.55474	3.05263	0.84	801	921	[[21, 801], [29, 921]]	0.567276
Bin8_350-399	30	31	822	950	3.64964	3.26316	1.12	792	919	[[30, 792], [31, 919]]	0.696115
Bin9_400-449	28	44	822	950	3.40633	4.63158	0.74	794	906	[[28, 794], [44, 906]]	0.227636
Bin10_450-499	21	31	822	950	2.55474	3.26316	0.78	801	919	[[21, 801], [31, 919]]	0.400392
Short_Tandem_repeats_Bin0	13	18	822	950	1.58151	1.89474	0.83	809	932	[[13, 809], [18, 932]]	0.717392			59.3674
Bin1_1-49	78	79	822	950	9.48905	8.31579	1.14	744	871	[[78, 744], [79, 871]]	0.402616			488
Bin2_50-99	60	90	822	950	7.29927	9.47368	0.77	762	860	[[60, 762], [90, 860]]	0.104637			334
Bin3_100-149	56	64	822	950	6.81265	6.73684	1.01	766	886	[[56, 766], [64, 886]]	1
Bin4_150-199	47	70	822	950	5.71776	7.36842	0.78	775	880	[[47, 775], [70, 880]]	0.179577
Bin5_200-249	41	61	822	950	4.98783	6.42105	0.78	781	889	[[41, 781], [61, 889]]	0.219986
Bin6_250-299	48	37	822	950	5.83942	3.89474	1.5	774	913	[[48, 774], [37, 913]]	0.0587335
Bin7_300-349	39	48	822	950	4.74453	5.05263	0.94	783	902	[[39, 783], [48, 902]]	0.825777
Bin8_350-399	42	50	822	950	5.10949	5.26316	0.97	780	900	[[42, 780], [50, 900]]	0.914822
Bin9_400-449	37	54	822	950	4.50122	5.68421	0.79	785	896	[[37, 785], [54, 896]]	0.281525
Bin10_450-499	27	49	822	950	3.28467	5.15789	0.64	795	901	[[27, 795], [49, 901]]	0.059726
Slipped_motifs_Bin0	4	5	822	950	0.486618	0.526316	0.92	818	945	[[4, 818], [5, 945]]	1			10.7056
Bin1_1-49	11	13	822	950	1.3382	1.36842	0.98	811	937	[[11, 811], [13, 937]]	1			88
Bin2_50-99	7	9	822	950	0.851582	0.947368	0.9	815	941	[[7, 815], [9, 941]]	1			734
Bin3_100-149	9	15	822	950	1.09489	1.57895	0.69	813	935	[[9, 813], [15, 935]]	0.416453
Bin4_150-199	9	3	822	950	1.09489	0.315789	3.47	813	947	[[9, 813], [3, 947]]	0.0772348
Bin5_200-249	6	5	822	950	0.729927	0.526316	1.39	816	945	[[6, 816], [5, 945]]	0.763634
Bin6_250-299	10	9	822	950	1.21655	0.947368	1.28	812	941	[[10, 812], [9, 941]]	0.647587
Bin7_300-349	11	7	822	950	1.3382	0.736842	1.82	811	943	[[11, 811], [7, 943]]	0.23991
Bin8_350-399	10	10	822	950	1.21655	1.05263	1.16	812	940	[[10, 812], [10, 940]]	0.823334
Bin9_400-449	3	14	822	950	0.364964	1.47368	0.25	819	936	[[3, 819], [14, 936]]	0.0249769	*
Bin10_450-499	8	13	822	950	0.973236	1.36842	0.71	814	937	[[8, 814], [13, 937]]	0.513425
Triplex_motifs_Bin0	0	1	822	950	0	0.105263	0	822	949	[[0, 822], [1, 949]]	1			2.6764
Bin1_1-49	3	0	822	950	0.364964	0	inf	819	950	[[3, 819], [0, 950]]	0.0996261			22
Bin2_50-99	2	1	822	950	0.243309	0.105263	2.31	820	949	[[2, 820], [1, 949]]	0.599754			800
Bin3_100-149	0	0	822	950	0	0	nan	822	950	[[0, 822], [0, 950]]	1
Bin4_150-199	3	0	822	950	0.364964	0	inf	819	950	[[3, 819], [0, 950]]	0.0996261
Bin5_200-249	1	0	822	950	0.121655	0	inf	821	950	[[1, 821], [0, 950]]	0.463883
Bin6_250-299	3	0	822	950	0.364964	0	inf	819	950	[[3, 819], [0, 950]]	0.0996261
Bin7_300-349	1	1	822	950	0.121655	0.105263	1.16	821	949	[[1, 821], [1, 949]]	1
Bin8_350-399	3	1	822	950	0.364964	0.105263	3.47	819	949	[[3, 819], [1, 949]]	0.342501
Bin9_400-449	5	2	822	950	0.608273	0.210526	2.89	817	948	[[5, 817], [2, 948]]	0.260585
Bin10_450-499	1	2	822	950	0.121655	0.210526	0.58	821	948	[[1, 821], [2, 948]]	1
Z-DNA_motifs_Bin0	3	1	822	950	0.364964	0.105263	3.47	819	949	[[3, 819], [1, 949]]	0.342501			12.6521
Bin1_1-49	20	7	822	950	2.43309	0.736842	3.3	802	943	[[20, 802], [7, 943]]	0.00545272	**		104
Bin2_50-99	10	8	822	950	1.21655	0.842105	1.44	812	942	[[10, 812], [8, 942]]	0.482134			718
Bin3_100-149	14	7	822	950	1.70316	0.736842	2.31	808	943	[[14, 808], [7, 943]]	0.0775106
Bin4_150-199	5	5	822	950	0.608273	0.526316	1.16	817	945	[[5, 817], [5, 945]]	1
Bin5_200-249	6	11	822	950	0.729927	1.15789	0.63	816	939	[[6, 816], [11, 939]]	0.465755
Bin6_250-299	8	9	822	950	0.973236	0.947368	1.03	814	941	[[8, 814], [9, 941]]	1
Bin7_300-349	10	10	822	950	1.21655	1.05263	1.16	812	940	[[10, 812], [10, 940]]	0.823334
Bin8_350-399	13	13	822	950	1.58151	1.36842	1.16	809	937	[[13, 809], [13, 937]]	0.843464
Bin9_400-449	11	14	822	950	1.3382	1.47368	0.91	811	936	[[11, 811], [14, 936]]	0.842847
Bin10_450-499	4	7	822	950	0.486618	0.736842	0.66	818	943	[[4, 818], [7, 943]]	0.559284
