# Supplementary material for: G-Quadruplex DNA and Other Non-Canonical B-Form DNA Motifs Influence Productive and Latent HIV-1 Integration and Reactivation Potential
Source: Viruses. 2022 Nov 11;14(11):2494. doi: 10.3390/v14112494 (PMC9692945; doi:10.3390/v14112494)
Supplement: Supplementary file 1 [file viruses-14-02494-s001.zip › Table S3 - Kohio Data.xlsx]

## Sheet: BRACO19_1_uM
Table S6: Integration site distribution with respect to G4 motifs in cells treated with increasing concentrations of G4-stabilizing and -destabilizing ligands.
Features	BRACO19	Untreated	BRACO19total	Untreatedtotal	BRACO19%	Untreated%	fold	BRACO19_diff	Untreated_diff	Table1	fisher	sig_rank		BRACO% sum	Untr% sum
G-quadruplex-forming_repeats_Bin0	2	12	797	2017	0.250941	0.594943	0.42	795	2005	[[2, 795], [12, 2005]]	0.373837			6.399	7.78384
Bin1_1-49	8	34	797	2017	1.00376	1.68567	0.6	789	1983	[[8, 789], [34, 1983]]	0.227046			51	157
Bin2_50-99	0	36	797	2017	0	1.78483	0	797	1981	[[0, 797], [36, 1981]]	7.39037e-06	****		746	1860
Bin3_100-149	14	29	797	2017	1.75659	1.43778	1.22	783	1988	[[14, 783], [29, 1988]]	0.500981
Bin4_150-199	16	6	797	2017	2.00753	0.297471	6.75	781	2011	[[16, 781], [6, 2011]]	1.8526e-05	****
Bin5_200-249	4	11	797	2017	0.501882	0.545364	0.92	793	2006	[[4, 793], [11, 2006]]	1
Bin6_250-299	5	7	797	2017	0.627353	0.34705	1.81	792	2010	[[5, 792], [7, 2010]]	0.338067
Bin7_300-349	0	2	797	2017	0	0.0991572	0	797	2015	[[0, 797], [2, 2015]]	1
Bin8_350-399	1	3	797	2017	0.125471	0.148736	0.84	796	2014	[[1, 796], [3, 2014]]	1
Bin9_400-449	0	6	797	2017	0	0.297471	0	797	2011	[[0, 797], [6, 2011]]	0.193071
Bin10_450-499	1	11	797	2017	0.125471	0.545364	0.23	796	2006	[[1, 796], [11, 2006]]	0.197694

## Sheet: BRACO19_3_uM
Features	BRACO19	Untreated	BRACO19total	Untreatedtotal	BRACO19%	Untreated%	fold	BRACO19_diff	Untreated_diff	Table1	fisher	sig_rank		BRACO% sum	Untr% sum
G-quadruplex-forming_repeats_Bin0	0	12	1073	2017	0	0.594943	0	1073	2005	[[0, 1073], [12, 2005]]	0.0111186	*		5.03262	7.78384
Bin1_1-49	0	34	1073	2017	0	1.68567	0	1073	1983	[[0, 1073], [34, 1983]]	5.61213e-07	****		54	157
Bin2_50-99	1	36	1073	2017	0.0931966	1.78483	0.05	1072	1981	[[1, 1072], [36, 1981]]	4.68341e-06	****		1019	1860
Bin3_100-149	13	29	1073	2017	1.21156	1.43778	0.84	1060	1988	[[13, 1060], [29, 1988]]	0.744477
Bin4_150-199	12	6	1073	2017	1.11836	0.297471	3.76	1061	2011	[[12, 1061], [6, 2011]]	0.00606179	**
Bin5_200-249	5	11	1073	2017	0.465983	0.545364	0.85	1068	2006	[[5, 1068], [11, 2006]]	1
Bin6_250-299	3	7	1073	2017	0.27959	0.34705	0.81	1070	2010	[[3, 1070], [7, 2010]]	1
Bin7_300-349	6	2	1073	2017	0.55918	0.0991572	5.64	1067	2015	[[6, 1067], [2, 2015]]	0.0241575	*
Bin8_350-399	4	3	1073	2017	0.372787	0.148736	2.51	1069	2014	[[4, 1069], [3, 2014]]	0.245404
Bin9_400-449	1	6	1073	2017	0.0931966	0.297471	0.31	1072	2011	[[1, 1072], [6, 2011]]	0.433312
Bin10_450-499	9	11	1073	2017	0.83877	0.545364	1.54	1064	2006	[[9, 1064], [11, 2006]]	0.351314

## Sheet: BRACO19_32_uM
Features	BRACO19	Untreated	BRACO19total	Untreatedtotal	BRACO19%	Untreated%	fold	BRACO19_diff	Untreated_diff	Table1	fisher	sig_rank		BRACO% sum	Untr% sum
G-quadruplex-forming_repeats_Bin0	4	12	759	2017	0.527009	0.594943	0.89	755	2005	[[4, 755], [12, 2005]]	1			8.43215	7.78384
Bin1_1-49	0	34	759	2017	0	1.68567	0	759	1983	[[0, 759], [34, 1983]]	2.29831e-05	****		64	157
Bin2_50-99	0	36	759	2017	0	1.78483	0	759	1981	[[0, 759], [36, 1981]]	1.36405e-05	****		695	1860
Bin3_100-149	12	29	759	2017	1.58103	1.43778	1.1	747	1988	[[12, 747], [29, 1988]]	0.728026
Bin4_150-199	5	6	759	2017	0.658762	0.297471	2.21	754	2011	[[5, 754], [6, 2011]]	0.184839
Bin5_200-249	4	11	759	2017	0.527009	0.545364	0.97	755	2006	[[4, 755], [11, 2006]]	1
Bin6_250-299	2	7	759	2017	0.263505	0.34705	0.76	757	2010	[[2, 757], [7, 2010]]	1
Bin7_300-349	5	2	759	2017	0.658762	0.0991572	6.64	754	2015	[[5, 754], [2, 2015]]	0.0190471	*
Bin8_350-399	5	3	759	2017	0.658762	0.148736	4.43	754	2014	[[5, 754], [3, 2014]]	0.0394665	*
Bin9_400-449	13	6	759	2017	1.71278	0.297471	5.76	746	2011	[[13, 746], [6, 2011]]	0.000214109	***
Bin10_450-499	14	11	759	2017	1.84453	0.545364	3.38	745	2006	[[14, 745], [11, 2006]]	0.00257532	**

## Sheet: TMPyP4_0_5_uM
Features	TMPyP4	Untreated	TMPyP4total	Untreatedtotal	TMPyP4%	Untreated%	fold	TMPyP4_diff	Untreated_diff	Table1	fisher	sig_rank		BRACO% sum	Untr% sum
G-quadrupleTMPyP4-forming_repeats_Bin0	7	12	1223	2017	0.572363	0.594943	0.96	1216	2005	[[7, 1216], [12, 2005]]	1			11.202	7.78384
Bin1_1-49	29	34	1223	2017	2.37122	1.68567	1.41	1194	1983	[[29, 1194], [34, 1983]]	0.189628			137	157
Bin2_50-99	6	36	1223	2017	0.490597	1.78483	0.27	1217	1981	[[6, 1217], [36, 1981]]	0.00114643	**		1086	1860
Bin3_100-149	7	29	1223	2017	0.572363	1.43778	0.4	1216	1988	[[7, 1216], [29, 1988]]	0.0240393	*
Bin4_150-199	0	6	1223	2017	0	0.297471	0	1223	2011	[[0, 1223], [6, 2011]]	0.0894345
Bin5_200-249	1	11	1223	2017	0.0817661	0.545364	0.15	1222	2006	[[1, 1222], [11, 2006]]	0.0376437	*
Bin6_250-299	25	7	1223	2017	2.04415	0.34705	5.89	1198	2010	[[25, 1198], [7, 2010]]	3.67568e-06	****
Bin7_300-349	13	2	1223	2017	1.06296	0.0991572	10.72	1210	2015	[[13, 1210], [2, 2015]]	0.000135566	***
Bin8_350-399	7	3	1223	2017	0.572363	0.148736	3.85	1216	2014	[[7, 1216], [3, 2014]]	0.0482585	*
Bin9_400-449	11	6	1223	2017	0.899428	0.297471	3.02	1212	2011	[[11, 1212], [6, 2011]]	0.0410576	*
Bin10_450-499	31	11	1223	2017	2.53475	0.545364	4.65	1192	2006	[[31, 1192], [11, 2006]]	2.60914e-06	****

## Sheet: TMPyP4_1_uM
Features	TMPyP4	Untreated	TMPyP4total	Untreatedtotal	TMPyP4%	Untreated%	fold	TMPyP4_diff	Untreated_diff	Table1	fisher	sig_rank		BRACO% sum	Untr% sum
G-quadruplex-forming_repeats_Bin0	3	12	1286	2017	0.233281	0.594943	0.39	1283	2005	[[3, 1283], [12, 2005]]	0.184947			7.46501	7.78384
Bin1_1-49	13	34	1286	2017	1.01089	1.68567	0.6	1273	1983	[[13, 1273], [34, 1983]]	0.131826			96	157
Bin2_50-99	27	36	1286	2017	2.09953	1.78483	1.18	1259	1981	[[27, 1259], [36, 1981]]	0.517174			1190	1860
Bin3_100-149	13	29	1286	2017	1.01089	1.43778	0.7	1273	1988	[[13, 1273], [29, 1988]]	0.340468
Bin4_150-199	4	6	1286	2017	0.311042	0.297471	1.05	1282	2011	[[4, 1282], [6, 2011]]	1
Bin5_200-249	1	11	1286	2017	0.0777605	0.545364	0.14	1285	2006	[[1, 1285], [11, 2006]]	0.0354532	*
Bin6_250-299	5	7	1286	2017	0.388802	0.34705	1.12	1281	2010	[[5, 1281], [7, 2010]]	1
Bin7_300-349	4	2	1286	2017	0.311042	0.0991572	3.14	1282	2015	[[4, 1282], [2, 2015]]	0.21629
Bin8_350-399	0	3	1286	2017	0	0.148736	0	1286	2014	[[0, 1286], [3, 2014]]	0.286519
Bin9_400-449	22	6	1286	2017	1.71073	0.297471	5.75	1264	2011	[[22, 1264], [6, 2011]]	3.87764e-05	****
Bin10_450-499	4	11	1286	2017	0.311042	0.545364	0.57	1282	2006	[[4, 1282], [11, 2006]]	0.43059

## Sheet: TMPyP4_8_uM
Features	TMPyP4	Untreated	TMPyP4total	Untreatedtotal	TMPyP4%	Untreated%	fold	TMPyP4_diff	Untreated_diff	Table1	fisher	sig_rank		BRACO% sum	Untr% sum
G-quadruplex-forming_repeats_Bin0	1	12	1302	2017	0.0768049	0.594943	0.13	1301	2005	[[1, 1301], [12, 2005]]	0.0208736	*		3.30261	7.78384
Bin1_1-49	6	34	1302	2017	0.460829	1.68567	0.27	1296	1983	[[6, 1296], [34, 1983]]	0.00158919	**		43	157
Bin2_50-99	4	36	1302	2017	0.30722	1.78483	0.17	1298	1981	[[4, 1298], [36, 1981]]	5.697e-05	****		1259	1860
Bin3_100-149	10	29	1302	2017	0.768049	1.43778	0.53	1292	1988	[[10, 1292], [29, 1988]]	0.0984539
Bin4_150-199	2	6	1302	2017	0.15361	0.297471	0.52	1300	2011	[[2, 1300], [6, 2011]]	0.493158
Bin5_200-249	1	11	1302	2017	0.0768049	0.545364	0.14	1301	2006	[[1, 1301], [11, 2006]]	0.0351035	*
Bin6_250-299	3	7	1302	2017	0.230415	0.34705	0.66	1299	2010	[[3, 1299], [7, 2010]]	0.74911
Bin7_300-349	5	2	1302	2017	0.384025	0.0991572	3.87	1297	2015	[[5, 1297], [2, 2015]]	0.119242
Bin8_350-399	3	3	1302	2017	0.230415	0.148736	1.55	1299	2014	[[3, 1299], [3, 2014]]	0.684913
Bin9_400-449	5	6	1302	2017	0.384025	0.297471	1.29	1297	2011	[[5, 1297], [6, 2011]]	0.760396
Bin10_450-499	3	11	1302	2017	0.230415	0.545364	0.42	1299	2006	[[3, 1299], [11, 2006]]	0.27205
