# Supplementary material for: G-Quadruplex DNA and Other Non-Canonical B-Form DNA Motifs Influence Productive and Latent HIV-1 Integration and Reactivation Potential
Source: Viruses. 2022 Nov 11;14(11):2494. doi: 10.3390/v14112494 (PMC9692945; doi:10.3390/v14112494)
Supplement: Supplementary file 1 [file viruses-14-02494-s001.zip › Table S4 - Achuthan Data.xlsx]

## Sheet: WT_MRC_Geno_stats
Table S4: Integration site distribution from HIV-1 infected wild type (WT), LEDGF defective (BID) and CPSF6 defective (A77V) cells from the Achuthan dataset.
Features	WT (x)	Random (r)	WTtotal	Randomtotal	x%	r%	fold	x_diff	r_diff	Table1	fisher	sig_rank
CpG_Islands_Bin0	15	28	277	2732	5.41516	1.02489	5.28	262	2704	[[15, 262], [28, 2704]]	2.81268e-06	****
Bin1_1-499	6	28	277	2732	2.16606	1.02489	2.11	271	2704	[[6, 271], [28, 2704]]	0.123172
Bin2_500-4999	68	205	277	2732	24.5487	7.50366	3.27	209	2527	[[68, 209], [205, 2527]]	3.91457e-16	****
Bin3_5000-49999	131	902	277	2732	47.2924	33.0161	1.43	146	1830	[[131, 146], [902, 1830]]	3.02691e-06	****
Bin4_50000-499999	56	1270	277	2732	20.2166	46.4861	0.43	221	1462	[[56, 221], [1270, 1462]]	4.14455e-18	****
DHS_Bin0	69	416	277	2732	24.9097	15.2269	1.64	208	2316	[[69, 208], [416, 2316]]	7.21743e-05	****
Bin1_1-499	154	1210	277	2732	55.5957	44.2899	1.26	123	1522	[[154, 123], [1210, 1522]]	0.000376382	***
Bin2_500-4999	54	990	277	2732	19.4946	36.2372	0.54	223	1742	[[54, 223], [990, 1742]]	9.04044e-09	****
Bin3_5000-49999	0	113	277	2732	0	4.13616	0	277	2619	[[0, 277], [113, 2619]]	3.41167e-05	****
Bin4_50000-499999	0	3	277	2732	0	0.10981	0	277	2729	[[0, 277], [3, 2729]]	1
Endogenous_retroviruses_Bin0	2	271	277	2732	0.722022	9.91947	0.07	275	2461	[[2, 275], [271, 2461]]	8.86306e-10	****
Bin1_1-499	24	346	277	2732	8.66426	12.6647	0.68	253	2386	[[24, 253], [346, 2386]]	0.05473
Bin2_500-4999	95	1368	277	2732	34.296	50.0732	0.68	182	1364	[[95, 182], [1368, 1364]]	5.40085e-07	****
Bin3_5000-49999	154	740	277	2732	55.5957	27.0864	2.05	123	1992	[[154, 123], [740, 1992]]	3.96444e-21	****
Bin4_50000-499999	2	7	277	2732	0.722022	0.256223	2.82	275	2725	[[2, 275], [7, 2725]]	0.19793
LADs_Bin0	27	1078	277	2732	9.74729	39.4583	0.25	250	1654	[[27, 250], [1078, 1654]]	1.63918e-26	****
Bin1_1-499	0	2	277	2732	0	0.0732064	0	277	2730	[[0, 277], [2, 2730]]	1
Bin2_500-4999	0	9	277	2732	0	0.329429	0	277	2723	[[0, 277], [9, 2723]]	1
Bin3_5000-49999	21	125	277	2732	7.58123	4.5754	1.66	256	2607	[[21, 256], [125, 2607]]	0.0381718	*
Bin4_50000-499999	88	550	277	2732	31.769	20.1318	1.58	189	2182	[[88, 189], [550, 2182]]	1.43197e-05	****
Long_interspersed_nuclear_elements_Bin0	12	555	277	2732	4.33213	20.3148	0.21	265	2177	[[12, 265], [555, 2177]]	2.05458e-13	****
Bin1_1-499	68	759	277	2732	24.5487	27.7818	0.88	209	1973	[[68, 209], [759, 1973]]	0.259398
Bin2_500-4999	170	1326	277	2732	61.3718	48.5359	1.26	107	1406	[[170, 107], [1326, 1406]]	5.13046e-05	****
Bin3_5000-49999	27	91	277	2732	9.74729	3.33089	2.93	250	2641	[[27, 250], [91, 2641]]	4.50647e-06	****
Bin4_50000-499999	0	1	277	2732	0	0.0366032	0	277	2731	[[0, 277], [1, 2731]]	1
Low_complexity_repeats_Bin0	1	28	277	2732	0.361011	1.02489	0.35	276	2704	[[1, 276], [28, 2704]]	0.512985
Bin1_1-499	35	299	277	2732	12.6354	10.9444	1.15	242	2433	[[35, 242], [299, 2433]]	0.42139
Bin2_500-4999	138	1439	277	2732	49.8195	52.672	0.95	139	1293	[[138, 139], [1439, 1293]]	0.377187
Bin3_5000-49999	103	960	277	2732	37.1841	35.1391	1.06	174	1772	[[103, 174], [960, 1772]]	0.509769
Bin4_50000-499999	0	6	277	2732	0	0.219619	0	277	2726	[[0, 277], [6, 2726]]	1
Oncogenes_Bin0	5	43	277	2732	1.80505	1.57394	1.15	272	2689	[[5, 272], [43, 2689]]	0.799119
Bin1_1-499	0	0	277	2732	0	0	nan	277	2732	[[0, 277], [0, 2732]]	1
Bin2_500-4999	2	7	277	2732	0.722022	0.256223	2.82	275	2725	[[2, 275], [7, 2725]]	0.19793
Bin3_5000-49999	10	44	277	2732	3.61011	1.61054	2.24	267	2688	[[10, 267], [44, 2688]]	0.0282649	*
Bin4_50000-499999	79	455	277	2732	28.5199	16.6545	1.71	198	2277	[[79, 198], [455, 2277]]	3.15287e-06	****
RefSeq_genes_Bin0	263	1265	277	2732	94.9458	46.3031	2.05	14	1467	[[263, 14], [1265, 1467]]	5.17622e-64	****
Bin1_1-499	0	27	277	2732	0	0.988287	0	277	2705	[[0, 277], [27, 2705]]	0.168908
Bin2_500-4999	2	136	277	2732	0.722022	4.97804	0.15	275	2596	[[2, 275], [136, 2596]]	0.000236137	***
Bin3_5000-49999	9	540	277	2732	3.2491	19.7657	0.16	268	2192	[[9, 268], [540, 2192]]	5.63503e-15	****
Bin4_50000-499999	3	676	277	2732	1.08303	24.7438	0.04	274	2056	[[3, 274], [676, 2056]]	6.72695e-28	****
Satellite_DNA_Bin0	0	8	277	2732	0	0.292826	0	277	2724	[[0, 277], [8, 2724]]	1
Bin1_1-499	0	2	277	2732	0	0.0732064	0	277	2730	[[0, 277], [2, 2730]]	1
Bin2_500-4999	2	11	277	2732	0.722022	0.402635	1.79	275	2721	[[2, 275], [11, 2721]]	0.339561
Bin3_5000-49999	2	55	277	2732	0.722022	2.01318	0.36	275	2677	[[2, 275], [55, 2677]]	0.165713
Bin4_50000-499999	27	344	277	2732	9.74729	12.5915	0.77	250	2388	[[27, 250], [344, 2388]]	0.180405
Simple_repeats_Bin0	0	71	277	2732	0	2.59883	0	277	2661	[[0, 277], [71, 2661]]	0.00148397	**
Bin1_1-499	52	539	277	2732	18.7726	19.7291	0.95	225	2193	[[52, 225], [539, 2193]]	0.751191
Bin2_500-4999	195	1772	277	2732	70.3971	64.8609	1.09	82	960	[[195, 82], [1772, 960]]	0.0733939
Bin3_5000-49999	30	350	277	2732	10.8303	12.8111	0.85	247	2382	[[30, 247], [350, 2382]]	0.392967
Bin4_50000-499999	0	0	277	2732	0	0	nan	277	2732	[[0, 277], [0, 2732]]	1
Short_interspersed_nuclear_elements_Bin0	2	384	277	2732	0.722022	14.0556	0.05	275	2348	[[2, 275], [384, 2348]]	8.80713e-15	****
Bin1_1-499	123	906	277	2732	44.4043	33.1625	1.34	154	1826	[[123, 154], [906, 1826]]	0.000244823	***
Bin2_500-4999	149	1349	277	2732	53.7906	49.3777	1.09	128	1383	[[149, 128], [1349, 1383]]	0.165807
Bin3_5000-49999	3	91	277	2732	1.08303	3.33089	0.33	274	2641	[[3, 274], [91, 2641]]	0.0436958	*
Bin4_50000-499999	0	2	277	2732	0	0.0732064	0	277	2730	[[0, 277], [2, 2730]]	1
Transcription_start_sites_Bin0	0	0	277	2732	0	0	nan	277	2732	[[0, 277], [0, 2732]]	1
Bin1_1-499	21	52	277	2732	7.58123	1.90337	3.98	256	2680	[[21, 256], [52, 2680]]	1.09894e-06	****
Bin2_500-4999	74	277	277	2732	26.7148	10.1391	2.63	203	2455	[[74, 203], [277, 2455]]	4.12216e-13	****
Bin3_5000-49999	150	1182	277	2732	54.1516	43.265	1.25	127	1550	[[150, 127], [1182, 1550]]	0.000592013	***
Bin4_50000-499999	32	1099	277	2732	11.5523	40.2269	0.29	245	1633	[[32, 245], [1099, 1633]]	5.08682e-24	****
UCSC_genes_Bin0	265	1290	277	2732	95.6679	47.2182	2.03	12	1442	[[265, 12], [1290, 1442]]	2.17492e-64	****
Bin1_1-499	0	27	277	2732	0	0.988287	0	277	2705	[[0, 277], [27, 2705]]	0.168908
Bin2_500-4999	3	125	277	2732	1.08303	4.5754	0.24	274	2607	[[3, 274], [125, 2607]]	0.0027488	**
Bin3_5000-49999	7	518	277	2732	2.52708	18.9605	0.13	270	2214	[[7, 270], [518, 2214]]	8.24671e-16	****
Bin4_50000-499999	2	667	277	2732	0.722022	24.4143	0.03	275	2065	[[2, 275], [667, 2065]]	8.98434e-29	****

## Sheet: LEDGFdef_BID_MRC_Geno_stats
Features	LEDGFdefective (BID) (x)	Random (r)	Xtotal	Randomtotal	x%	r%	fold	x_diff	r_diff	Table1	fisher	sig_rank
CpG_Islands_Bin0	7	81	2949	29205	0.237369	0.27735	0.86	2942	29124	[[7, 2942], [81, 29124]]	0.853466
Bin1_1-499	15	200	2949	29205	0.508647	0.684814	0.74	2934	29005	[[15, 2934], [200, 29005]]	0.341334
Bin2_500-4999	220	1725	2949	29205	7.46016	5.90652	1.26	2729	27480	[[220, 2729], [1725, 27480]]	0.00101636	**
Bin3_5000-49999	990	9073	2949	29205	33.5707	31.0666	1.08	1959	20132	[[990, 1959], [9073, 20132]]	0.00558013	**
Bin4_50000-499999	1452	14354	2949	29205	49.237	49.1491	1	1497	14851	[[1452, 1497], [14354, 14851]]	0.938388
DHS_Bin0	579	3960	2949	29205	19.6338	13.5593	1.45	2370	25245	[[579, 2370], [3960, 25245]]	4.72145e-18	****
Bin1_1-499	1374	12264	2949	29205	46.5921	41.9928	1.11	1575	16941	[[1374, 1575], [12264, 16941]]	1.65399e-06	****
Bin2_500-4999	976	11594	2949	29205	33.096	39.6987	0.83	1973	17611	[[976, 1973], [11594, 17611]]	1.70728e-12	****
Bin3_5000-49999	19	1015	2949	29205	0.644286	3.47543	0.19	2930	28190	[[19, 2930], [1015, 28190]]	7.69695e-23	****
Bin4_50000-499999	1	358	2949	29205	0.0339098	1.22582	0.03	2948	28847	[[1, 2948], [358, 28847]]	5.01066e-14	****
Endogenous_retroviruses_Bin0	481	2588	2949	29205	16.3106	8.8615	1.84	2468	26617	[[481, 2468], [2588, 26617]]	4.87347e-34	****
Bin1_1-499	394	4203	2949	29205	13.3605	14.3914	0.93	2555	25002	[[394, 2555], [4203, 25002]]	0.129077
Bin2_500-4999	1372	14922	2949	29205	46.5242	51.094	0.91	1577	14283	[[1372, 1577], [14922, 14283]]	2.39029e-06	****
Bin3_5000-49999	698	7411	2949	29205	23.669	25.3758	0.93	2251	21794	[[698, 2251], [7411, 21794]]	0.0429087	*
Bin4_50000-499999	4	81	2949	29205	0.135639	0.27735	0.49	2945	29124	[[4, 2945], [81, 29124]]	0.18757
LADs_Bin0	1101	12177	2949	29205	37.3347	41.6949	0.9	1848	17028	[[1101, 1848], [12177, 17028]]	4.36031e-06	****
Bin1_1-499	0	11	2949	29205	0	0.0376648	0	2949	29194	[[0, 2949], [11, 29194]]	0.614408
Bin2_500-4999	2	117	2949	29205	0.0678196	0.400616	0.17	2947	29088	[[2, 2947], [117, 29088]]	0.00202312	**
Bin3_5000-49999	94	1222	2949	29205	3.18752	4.18422	0.76	2855	27983	[[94, 2855], [1222, 27983]]	0.00839485	**
Bin4_50000-499999	628	6127	2949	29205	21.2954	20.9793	1.02	2321	23078	[[628, 2321], [6127, 23078]]	0.686852
Long_interspersed_nuclear_elements_Bin0	429	6781	2949	29205	14.5473	23.2186	0.63	2520	22424	[[429, 2520], [6781, 22424]]	2.75458e-29	****
Bin1_1-499	881	7954	2949	29205	29.8745	27.2351	1.1	2068	21251	[[881, 2068], [7954, 21251]]	0.00244068	**
Bin2_500-4999	1504	13435	2949	29205	51.0003	46.0024	1.11	1445	15770	[[1504, 1445], [13435, 15770]]	2.28427e-07	****
Bin3_5000-49999	135	1029	2949	29205	4.57782	3.52337	1.3	2814	28176	[[135, 2814], [1029, 28176]]	0.00440767	**
Bin4_50000-499999	0	6	2949	29205	0	0.0205444	0	2949	29199	[[0, 2949], [6, 29199]]	1
Low_complexity_repeats_Bin0	18	191	2949	29205	0.610376	0.653998	0.93	2931	29014	[[18, 2931], [191, 29014]]	0.904202
Bin1_1-499	270	3482	2949	29205	9.15565	11.9226	0.77	2679	25723	[[270, 2679], [3482, 25723]]	5.37185e-06	****
Bin2_500-4999	1559	15557	2949	29205	52.8654	53.2683	0.99	1390	13648	[[1559, 1390], [15557, 13648]]	0.684307
Bin3_5000-49999	1100	9914	2949	29205	37.3008	33.9462	1.1	1849	19291	[[1100, 1849], [9914, 19291]]	0.000289121	***
Bin4_50000-499999	2	61	2949	29205	0.0678196	0.208868	0.32	2947	29144	[[2, 2947], [61, 29144]]	0.123367
Oncogenes_Bin0	53	509	2949	29205	1.79722	1.74285	1.03	2896	28696	[[53, 2896], [509, 28696]]	0.824839
Bin1_1-499	0	5	2949	29205	0	0.0171204	0	2949	29200	[[0, 2949], [5, 29200]]	1
Bin2_500-4999	2	46	2949	29205	0.0678196	0.157507	0.43	2947	29159	[[2, 2947], [46, 29159]]	0.317874
Bin3_5000-49999	50	476	2949	29205	1.69549	1.62986	1.04	2899	28729	[[50, 2899], [476, 28729]]	0.760738
Bin4_50000-499999	495	4402	2949	29205	16.7854	15.0728	1.11	2454	24803	[[495, 2454], [4402, 24803]]	0.0144067	*
RefSeq_genes_Bin0	1450	13220	2949	29205	49.1692	45.2662	1.09	1499	15985	[[1450, 1499], [13220, 15985]]	5.44014e-05	****
Bin1_1-499	7	167	2949	29205	0.237369	0.57182	0.42	2942	29038	[[7, 2942], [167, 29038]]	0.0167604	*
Bin2_500-4999	197	1316	2949	29205	6.68023	4.50608	1.48	2752	27889	[[197, 2752], [1316, 27889]]	4.71659e-07	****
Bin3_5000-49999	451	5667	2949	29205	15.2933	19.4042	0.79	2498	23538	[[451, 2498], [5667, 23538]]	3.39219e-08	****
Bin4_50000-499999	794	7751	2949	29205	26.9244	26.54	1.01	2155	21454	[[794, 2155], [7751, 21454]]	0.661811
Satellite_DNA_Bin0	1	94	2949	29205	0.0339098	0.321863	0.11	2948	29111	[[1, 2948], [94, 29111]]	0.00203331	**
Bin1_1-499	2	19	2949	29205	0.0678196	0.0650574	1.04	2947	29186	[[2, 2947], [19, 29186]]	1
Bin2_500-4999	2	92	2949	29205	0.0678196	0.315015	0.22	2947	29113	[[2, 2947], [92, 29113]]	0.0114103	*
Bin3_5000-49999	115	611	2949	29205	3.89963	2.09211	1.86	2834	28594	[[115, 2834], [611, 28594]]	7.38574e-09	****
Bin4_50000-499999	399	3504	2949	29205	13.53	11.9979	1.13	2550	25701	[[399, 2550], [3504, 25701]]	0.0165341	*
Simple_repeats_Bin0	13	530	2949	29205	0.440827	1.81476	0.24	2936	28675	[[13, 2936], [530, 28675]]	2.52174e-10	****
Bin1_1-499	606	5372	2949	29205	20.5493	18.3941	1.12	2343	23833	[[606, 2343], [5372, 23833]]	0.00462921	**
Bin2_500-4999	2063	19504	2949	29205	69.9559	66.7831	1.05	886	9701	[[2063, 886], [19504, 9701]]	0.000472503	***
Bin3_5000-49999	267	3799	2949	29205	9.05392	13.008	0.7	2682	25406	[[267, 2682], [3799, 25406]]	1.77349e-10	****
Bin4_50000-499999	0	0	2949	29205	0	0	nan	2949	29205	[[0, 2949], [0, 29205]]	1
Short_interspersed_nuclear_elements_Bin0	315	3209	2949	29205	10.6816	10.9878	0.97	2634	25996	[[315, 2634], [3209, 25996]]	0.642695
Bin1_1-499	1148	10499	2949	29205	38.9285	35.9493	1.08	1801	18706	[[1148, 1801], [10499, 18706]]	0.00139294	**
Bin2_500-4999	1414	14408	2949	29205	47.9485	49.334	0.97	1535	14797	[[1414, 1535], [14408, 14797]]	0.152752
Bin3_5000-49999	72	1067	2949	29205	2.44151	3.65348	0.67	2877	28138	[[72, 2877], [1067, 28138]]	0.000450581	***
Bin4_50000-499999	0	22	2949	29205	0	0.0753296	0	2949	29183	[[0, 2949], [22, 29183]]	0.257457
Transcription_start_sites_Bin0	0	0	2949	29205	0	0	nan	2949	29205	[[0, 2949], [0, 29205]]	1
Bin1_1-499	21	293	2949	29205	0.712106	1.00325	0.71	2928	28912	[[21, 2928], [293, 28912]]	0.140071
Bin2_500-4999	326	2711	2949	29205	11.0546	9.28266	1.19	2623	26494	[[326, 2623], [2711, 26494]]	0.00211117	**
Bin3_5000-49999	1217	12271	2949	29205	41.2682	42.0168	0.98	1732	16934	[[1217, 1732], [12271, 16934]]	0.445155
Bin4_50000-499999	1303	12314	2949	29205	44.1845	42.164	1.05	1646	16891	[[1303, 1646], [12314, 16891]]	0.0347254	*
UCSC_genes_Bin0	1486	13403	2949	29205	50.39	45.8928	1.1	1463	15802	[[1486, 1463], [13403, 15802]]	3.28636e-06	****
Bin1_1-499	10	161	2949	29205	0.339098	0.551275	0.62	2939	29044	[[10, 2939], [161, 29044]]	0.144339
Bin2_500-4999	165	1306	2949	29205	5.59512	4.47184	1.25	2784	27899	[[165, 2784], [1306, 27899]]	0.00634838	**
Bin3_5000-49999	421	5555	2949	29205	14.276	19.0207	0.75	2528	23650	[[421, 2528], [5555, 23650]]	9.92285e-11	****
Bin4_50000-499999	814	7539	2949	29205	27.6026	25.8141	1.07	2135	21666	[[814, 2135], [7539, 21666]]	0.036334	*

## Sheet: CPSF6 def_A77V_MRC_Geno_stats
Features	CPSF6 defective (A77V) (x)	Random (r)	Xtotal	Randomtotal	x%	r%	fold	x_diff	r_diff	Table1	fisher	sig_rank
CpG_Islands_Bin0	5	158	4431	43799	0.112841	0.360739	0.31	4426	43641	[[5, 4426], [158, 43641]]	0.00393263	**
Bin1_1-499	26	331	4431	43799	0.586775	0.755725	0.78	4405	43468	[[26, 4405], [331, 43468]]	0.232164
Bin2_500-4999	344	2563	4431		7.76348	5.85173	1.33	4087	41236	[[344, 4087], [2563, 41236]]	9.07589e-07	****
Bin3_5000-49999	1573	13567	4431	43799	35.4999	30.9756	1.15	2858	30232	[[1573, 2858], [13567, 30232]]	9.45306e-10	****
Bin4_50000-499999	2051	21555	4431	43799	46.2875	49.2135	0.94	2380	22244	[[2051, 2380], [21555, 22244]]	0.000210493	***
DHS_Bin0	954	5948	4431	43799	21.5301	13.5802	1.59	3477	37851	[[954, 3477], [5948, 37851]]	1.83593e-42	****
Bin1_1-499	2041	18242	4431	43799	46.0618	41.6494	1.11	2390	25557	[[2041, 2390], [18242, 25557]]	1.70847e-08	****
Bin2_500-4999	1382	17436	4431	43799	31.1893	39.8091	0.78	3049	26363	[[1382, 3049], [17436, 26363]]	7.37641e-30	****
Bin3_5000-49999	51	1596	4431	43799	1.15098	3.64392	0.32	4380	42203	[[51, 4380], [1596, 42203]]	4.85327e-23	****
Bin4_50000-499999	3	544	4431	43799	0.0677048	1.24204	0.05	4428	43255	[[3, 4428], [544, 43255]]	4.58579e-19	****
Endogenous_retroviruses_Bin0	735	3805	4431	43799	16.5877	8.68741	1.91	3696	39994	[[735, 3696], [3805, 39994]]	2.15715e-56	****
Bin1_1-499	625	6233	4431	43799	14.1052	14.2309	0.99	3806	37566	[[625, 3806], [6233, 37566]]	0.839044
Bin2_500-4999	2110	22539	4431	43799	47.619	51.4601	0.93	2321	21260	[[2110, 2321], [22539, 21260]]	1.1839e-06	****
Bin3_5000-49999	953	11085	4431	43799	21.5076	25.3088	0.85	3478	32714	[[953, 3478], [11085, 32714]]	1.78637e-08	****
Bin4_50000-499999	8	137	4431	43799	0.180546	0.312793	0.58	4423	43662	[[8, 4423], [137, 43662]]	0.148748
LADs_Bin0	1806	18127	4431	43799	40.7583	41.3868	0.98	2625	25672	[[1806, 2625], [18127, 25672]]	0.42353
Bin1_1-499	0	16	4431	43799	0	0.0365305	0	4431	43783	[[0, 4431], [16, 43783]]	0.390786
Bin2_500-4999	9	189	4431	43799	0.203114	0.431517	0.47	4422	43610	[[9, 4422], [189, 43610]]	0.0189542	*
Bin3_5000-49999	147	1813	4431	43799	3.31754	4.13936	0.8	4284	41986	[[147, 4284], [1813, 41986]]	0.00745494	**
Bin4_50000-499999	927	9162	4431	43799	20.9208	20.9183	1	3504	34637	[[927, 3504], [9162, 34637]]	1
Long_interspersed_nuclear_elements_Bin0	670	10168	4431	43799	15.1207	23.2151	0.65	3761	33631	[[670, 3761], [10168, 33631]]	1.76411e-37	****
Bin1_1-499	1333	11957	4431	43799	30.0835	27.2997	1.1	3098	31842	[[1333, 3098], [11957, 31842]]	8.94821e-05	****
Bin2_500-4999	2261	20072	4431	43799	51.0269	45.8275	1.11	2170	23727	[[2261, 2170], [20072, 23727]]	4.22357e-11	****
Bin3_5000-49999	167	1589	4431	43799	3.7689	3.62794	1.04	4264	42210	[[167, 4264], [1589, 42210]]	0.613752
Bin4_50000-499999	0	13	4431	43799	0	0.029681	0	4431	43786	[[0, 4431], [13, 43786]]	0.624215
Low_complexity_repeats_Bin0	15	306	4431	43799	0.338524	0.698646	0.48	4416	43493	[[15, 4416], [306, 43493]]	0.00343932	**
Bin1_1-499	471	5259	4431	43799	10.6297	12.0071	0.89	3960	38540	[[471, 3960], [5259, 38540]]	0.00683276	**
Bin2_500-4999	2355	23231	4431	43799	53.1483	53.04	1	2076	20568	[[2355, 2076], [23231, 20568]]	0.899458
Bin3_5000-49999	1586	14901	4431	43799	35.7933	34.0213	1.05	2845	28898	[[1586, 2845], [14901, 28898]]	0.0182859	*
Bin4_50000-499999	4	102	4431	43799	0.0902731	0.232882	0.39	4427	43697	[[4, 4427], [102, 43697]]	0.0614414
Oncogenes_Bin0	75	703	4431	43799	1.69262	1.60506	1.05	4356	43096	[[75, 4356], [703, 43096]]	0.6612
Bin1_1-499	0	11	4431	43799	0	0.0251147	0	4431	43788	[[0, 4431], [11, 43788]]	0.614437
Bin2_500-4999	5	60	4431	43799	0.112841	0.136989	0.82	4426	43739	[[5, 4426], [60, 43739]]	0.831328
Bin3_5000-49999	99	767	4431	43799	2.23426	1.75118	1.28	4332	43032	[[99, 4332], [767, 43032]]	0.0239558	*
Bin4_50000-499999	774	6446	4431	43799	17.4678	14.7172	1.19	3657	37353	[[774, 3657], [6446, 37353]]	1.60686e-06	****
RefSeq_genes_Bin0	2154	19836	4431	43799	48.6121	45.2887	1.07	2277	23963	[[2154, 2277], [19836, 23963]]	2.37666e-05	****
Bin1_1-499	12	251	4431	43799	0.270819	0.573072	0.47	4419	43548	[[12, 4419], [251, 43548]]	0.00709352	**
Bin2_500-4999	276	2012	4431	43799	6.22884	4.59371	1.36	4155	41787	[[276, 4155], [2012, 41787]]	2.83977e-06	****
Bin3_5000-49999	740	8350	4431	43799	16.7005	19.0644	0.88	3691	35449	[[740, 3691], [8350, 35449]]	0.000108485	***
Bin4_50000-499999	1157	11660	4431	43799	26.1115	26.6216	0.98	3274	32139	[[1157, 3274], [11660, 32139]]	0.475381
Satellite_DNA_Bin0	5	131	4431	43799	0.112841	0.299094	0.38	4426	43668	[[5, 4426], [131, 43668]]	0.0243539	*
Bin1_1-499	3	32	4431	43799	0.0677048	0.073061	0.93	4428	43767	[[3, 4428], [32, 43767]]	1
Bin2_500-4999	6	184	4431	43799	0.13541	0.420101	0.32	4425	43615	[[6, 4425], [184, 43615]]	0.00223129	**
Bin3_5000-49999	205	1028	4431	43799	4.6265	2.34709	1.97	4226	42771	[[205, 4226], [1028, 42771]]	7.29457e-17	****
Bin4_50000-499999	523	5266	4431	43799	11.8032	12.0231	0.98	3908	38533	[[523, 3908], [5266, 38533]]	0.68017
Simple_repeats_Bin0	26	800	4431	43799	0.586775	1.82653	0.32	4405	42999	[[26, 4405], [800, 42999]]	8.85601e-12	****
Bin1_1-499	946	8209	4431	43799	21.3496	18.7424	1.14	3485	35590	[[946, 3485], [8209, 35590]]	3.15206e-05	****
Bin2_500-4999	3051	29148	4431	43799	68.8558	66.5495	1.03	1380	14651	[[3051, 1380], [29148, 14651]]	0.0018552	**
Bin3_5000-49999	408	5642	4431	43799	9.20785	12.8816	0.71	4023	38157	[[408, 4023], [5642, 38157]]	3.5281e-13	****
Bin4_50000-499999	0	0	4431	43799	0	0	nan	4431	43799	[[0, 4431], [0, 43799]]	1
Short_interspersed_nuclear_elements_Bin0	458	4965	4431	43799	10.3363	11.3359	0.91	3973	38834	[[458, 3973], [4965, 38834]]	0.0458875	*
Bin1_1-499	1787	15765	4431	43799	40.3295	35.994	1.12	2644	28034	[[1787, 2644], [15765, 28034]]	1.41651e-08	****
Bin2_500-4999	2097	21424	4431	43799	47.3257	48.9144	0.97	2334	22375	[[2097, 2334], [21424, 22375]]	0.0452023	*
Bin3_5000-49999	89	1597	4431	43799	2.00858	3.6462	0.55	4342	42202	[[89, 4342], [1597, 42202]]	1.60251e-09	****
Bin4_50000-499999	0	48	4431	43799	0	0.109592	0	4431	43751	[[0, 4431], [48, 43751]]	0.0205207	*
Transcription_start_sites_Bin0	0	1	4431	43799	0	0.00228316	0	4431	43798	[[0, 4431], [1, 43798]]	1
Bin1_1-499	39	508	4431	43799	0.880162	1.15984	0.76	4392	43291	[[39, 4392], [508, 43291]]	0.10114
Bin2_500-4999	505	4051	4431	43799	11.397	9.24907	1.23	3926	39748	[[505, 3926], [4051, 39748]]	5.83433e-06	****
Bin3_5000-49999	1931	18205	4431	43799	43.5793	41.5649	1.05	2500	25594	[[1931, 2500], [18205, 25594]]	0.0100657	*
Bin4_50000-499999	1805	18694	4431	43799	40.7357	42.6813	0.95	2626	25105	[[1805, 2626], [18694, 25105]]	0.012863	*
UCSC_genes_Bin0	2156	20096	4431	43799	48.6572	45.8823	1.06	2275	23703	[[2156, 2275], [20096, 23703]]	0.000421452	***
Bin1_1-499	17	271	4431	43799	0.383661	0.618736	0.62	4414	43528	[[17, 4414], [271, 43528]]	0.051773
Bin2_500-4999	286	1987	4431	43799	6.45452	4.53663	1.42	4145	41812	[[286, 4145], [1987, 41812]]	4.17644e-08	****
Bin3_5000-49999	741	8118	4431	43799	16.7231	18.5347	0.9	3690	35681	[[741, 3690], [8118, 35681]]	0.00295268	**
Bin4_50000-499999	1131	11499	4431	43799	25.5247	26.254	0.97	3300	32300	[[1131, 3300], [11499, 32300]]	0.298431

## Sheet: WTvsMRC_NonB_stats
Features	WT (x)	Random (r)	Testtotal	Randomtotal	x%	r%	fold	x_diff	r_diff	Table1	fisher	sig_rank		x%sum	x%sum
A_Phased_motifs_Bin0	0	13	277	2731	0	0.476016	0	277	2718	[[0, 277], [13, 2718]]	0.623783			9.38628	13.0355
Bin1_1-49	2	38	277	2731	0.722022	1.39143	0.52	275	2693	[[2, 275], [38, 2693]]	0.578403			26	356
Bin2_50-99	3	42	277	2731	1.08303	1.5379	0.7	274	2689	[[3, 274], [42, 2689]]	0.794445			251	-79
Bin3_100-149	5	33	277	2731	1.80505	1.20835	1.49	272	2698	[[5, 272], [33, 2698]]	0.390774
Bin4_150-199	3	33	277	2731	1.08303	1.20835	0.9	274	2698	[[3, 274], [33, 2698]]	1
Bin5_200-249	1	32	277	2731	0.361011	1.17173	0.31	276	2699	[[1, 276], [32, 2699]]	0.359826
Bin6_250-299	2	42	277	2731	0.722022	1.5379	0.47	275	2689	[[2, 275], [42, 2689]]	0.428708
Bin7_300-349	2	32	277	2731	0.722022	1.17173	0.62	275	2699	[[2, 275], [32, 2699]]	0.764866
Bin8_350-399	4	28	277	2731	1.44404	1.02527	1.41	273	2703	[[4, 273], [28, 2703]]	0.531252
Bin9_400-449	0	35	277	2731	0	1.28158	0	277	2696	[[0, 277], [35, 2696]]	0.0702769
Bin10_450-499	4	28	277	2731	1.44404	1.02527	1.41	273	2703	[[4, 273], [28, 2703]]	0.531252
Cruciform_motifs_Bin0	0	4	277	2731	0	0.146466	0	277	2727	[[0, 277], [4, 2727]]	1			2.88809	3.77151
Bin1_1-49	1	7	277	2731	0.361011	0.256316	1.41	276	2724	[[1, 276], [7, 2724]]	0.538746			8	103
Bin2_50-99	0	9	277	2731	0	0.32955	0	277	2722	[[0, 277], [9, 2722]]	1			269	174
Bin3_100-149	3	14	277	2731	1.08303	0.512633	2.11	274	2717	[[3, 274], [14, 2717]]	0.20161
Bin4_150-199	1	7	277	2731	0.361011	0.256316	1.41	276	2724	[[1, 276], [7, 2724]]	0.538746
Bin5_200-249	0	9	277	2731	0	0.32955	0	277	2722	[[0, 277], [9, 2722]]	1
Bin6_250-299	1	11	277	2731	0.361011	0.402783	0.9	276	2720	[[1, 276], [11, 2720]]	1
Bin7_300-349	0	11	277	2731	0	0.402783	0	277	2720	[[0, 277], [11, 2720]]	0.613794
Bin8_350-399	1	14	277	2731	0.361011	0.512633	0.7	276	2717	[[1, 276], [14, 2717]]	1
Bin9_400-449	0	8	277	2731	0	0.292933	0	277	2723	[[0, 277], [8, 2723]]	1
Bin10_450-499	1	9	277	2731	0.361011	0.32955	1.1	276	2722	[[1, 276], [9, 2722]]	1
Direct_repeats_Bin0	0	31	277	2731	0	1.13512	0	277	2700	[[0, 277], [31, 2700]]	0.10882			31.769	32.0395
Bin1_1-49	5	103	277	2731	1.80505	3.77151	0.48	272	2628	[[5, 272], [103, 2628]]	0.124179			88	875
Bin2_50-99	5	84	277	2731	1.80505	3.0758	0.59	272	2647	[[5, 272], [84, 2647]]	0.348712			189	-598
Bin3_100-149	2	93	277	2731	0.722022	3.40535	0.21	275	2638	[[2, 275], [93, 2638]]	0.0104053	*
Bin4_150-199	5	97	277	2731	1.80505	3.55181	0.51	272	2634	[[5, 272], [97, 2634]]	0.161255
Bin5_200-249	11	92	277	2731	3.97112	3.36873	1.18	266	2639	[[11, 266], [92, 2639]]	0.601427
Bin6_250-299	30	62	277	2731	10.8303	2.27023	4.77	247	2669	[[30, 247], [62, 2669]]	1.53369e-10	****
Bin7_300-349	8	88	277	2731	2.88809	3.22226	0.9	269	2643	[[8, 269], [88, 2643]]	1
Bin8_350-399	8	79	277	2731	2.88809	2.89271	1	269	2652	[[8, 269], [79, 2652]]	1
Bin9_400-449	9	75	277	2731	3.2491	2.74625	1.18	268	2656	[[9, 268], [75, 2656]]	0.567505
Bin10_450-499	5	71	277	2731	1.80505	2.59978	0.69	272	2660	[[5, 272], [71, 2660]]	0.547563
G-quadruplex-forming_repeats_Bin0	0	13	277	2731	0	0.476016	0	277	2718	[[0, 277], [13, 2718]]	0.623783			18.0505	11.5709
Bin1_1-49	5	40	277	2731	1.80505	1.46466	1.23	272	2691	[[5, 272], [40, 2691]]	0.602251			50	316
Bin2_50-99	3	28	277	2731	1.08303	1.02527	1.06	274	2703	[[3, 274], [28, 2703]]	0.760043			227	-39
Bin3_100-149	7	45	277	2731	2.52708	1.64775	1.53	270	2686	[[7, 270], [45, 2686]]	0.326364
Bin4_150-199	13	27	277	2731	4.69314	0.988649	4.75	264	2704	[[13, 264], [27, 2704]]	3.18738e-05	****
Bin5_200-249	5	36	277	2731	1.80505	1.3182	1.37	272	2695	[[5, 272], [36, 2695]]	0.421345
Bin6_250-299	4	31	277	2731	1.44404	1.13512	1.27	273	2700	[[4, 273], [31, 2700]]	0.558194
Bin7_300-349	6	32	277	2731	2.16606	1.17173	1.85	271	2699	[[6, 271], [32, 2699]]	0.155979
Bin8_350-399	3	20	277	2731	1.08303	0.732332	1.48	274	2711	[[3, 274], [20, 2711]]	0.464105
Bin9_400-449	2	20	277	2731	0.722022	0.732332	0.99	275	2711	[[2, 275], [20, 2711]]	1
Bin10_450-499	2	24	277	2731	0.722022	0.878799	0.82	275	2707	[[2, 275], [24, 2707]]	1
Inverted_repeats_Bin0	10	130	277	2731	3.61011	4.76016	0.76	267	2601	[[10, 267], [130, 2601]]	0.455834			88.0866	87.9165
Bin1_1-49	40	502	277	2731	14.4404	18.3815	0.79	237	2229	[[40, 237], [502, 2229]]	0.118688			244	2401
Bin2_50-99	39	428	277	2731	14.0794	15.6719	0.9	238	2303	[[39, 238], [428, 2303]]	0.542347			33	-2124
Bin3_100-149	32	324	277	2731	11.5523	11.8638	0.97	245	2407	[[32, 245], [324, 2407]]	1
Bin4_150-199	30	231	277	2731	10.8303	8.45844	1.28	247	2500	[[30, 247], [231, 2500]]	0.179424
Bin5_200-249	14	216	277	2731	5.05415	7.90919	0.64	263	2515	[[14, 263], [216, 2515]]	0.0964295
Bin6_250-299	17	157	277	2731	6.13718	5.74881	1.07	260	2574	[[17, 260], [157, 2574]]	0.786751
Bin7_300-349	31	136	277	2731	11.1913	4.97986	2.25	246	2595	[[31, 246], [136, 2595]]	8.97439e-05	****
Bin8_350-399	14	100	277	2731	5.05415	3.66166	1.38	263	2631	[[14, 263], [100, 2631]]	0.246702
Bin9_400-449	4	84	277	2731	1.44404	3.0758	0.47	273	2647	[[4, 273], [84, 2647]]	0.137061
Bin10_450-499	13	93	277	2731	4.69314	3.40535	1.38	264	2638	[[13, 264], [93, 2638]]	0.301651
Mirror_repeats_Bin0	4	66	277	2731	1.44404	2.4167	0.6	273	2665	[[4, 273], [66, 2665]]	0.403798			40.7942	38.5939
Bin1_1-49	6	135	277	2731	2.16606	4.94324	0.44	271	2596	[[6, 271], [135, 2596]]	0.0359099	*		113	1054
Bin2_50-99	19	109	277	2731	6.85921	3.99121	1.72	258	2622	[[19, 258], [109, 2622]]	0.0401432	*		164	-777
Bin3_100-149	11	116	277	2731	3.97112	4.24753	0.93	266	2615	[[11, 266], [116, 2615]]	1
Bin4_150-199	9	96	277	2731	3.2491	3.5152	0.92	268	2635	[[9, 268], [96, 2635]]	1
Bin5_200-249	10	103	277	2731	3.61011	3.77151	0.96	267	2628	[[10, 267], [103, 2628]]	1
Bin6_250-299	22	74	277	2731	7.94224	2.70963	2.93	255	2657	[[22, 255], [74, 2657]]	3.54458e-05	****
Bin7_300-349	10	82	277	2731	3.61011	3.00256	1.2	267	2649	[[10, 267], [82, 2649]]	0.58085
Bin8_350-399	7	86	277	2731	2.52708	3.14903	0.8	270	2645	[[7, 270], [86, 2645]]	0.715816
Bin9_400-449	9	89	277	2731	3.2491	3.25888	1	268	2642	[[9, 268], [89, 2642]]	1
Bin10_450-499	6	98	277	2731	2.16606	3.58843	0.6	271	2633	[[6, 271], [98, 2633]]	0.297993
Short_Tandem_repeats_Bin0	2	42	277	2731	0.722022	1.5379	0.47	275	2689	[[2, 275], [42, 2689]]	0.428708			58.1227	57.5247
Bin1_1-49	12	235	277	2731	4.33213	8.60491	0.5	265	2496	[[12, 265], [235, 2496]]	0.0112171	*		161	1571
Bin2_50-99	17	191	277	2731	6.13718	6.99378	0.88	260	2540	[[17, 260], [191, 2540]]	0.708992			116	-1294
Bin3_100-149	12	174	277	2731	4.33213	6.37129	0.68	265	2557	[[12, 265], [174, 2557]]	0.236997
Bin4_150-199	22	176	277	2731	7.94224	6.44453	1.23	255	2555	[[22, 255], [176, 2555]]	0.311439
Bin5_200-249	19	142	277	2731	6.85921	5.19956	1.32	258	2589	[[19, 258], [142, 2589]]	0.260561
Bin6_250-299	29	141	277	2731	10.4693	5.16294	2.03	248	2590	[[29, 248], [141, 2590]]	0.000866267	***
Bin7_300-349	12	125	277	2731	4.33213	4.57708	0.95	265	2606	[[12, 265], [125, 2606]]	1
Bin8_350-399	12	138	277	2731	4.33213	5.05309	0.86	265	2593	[[12, 265], [138, 2593]]	0.771377
Bin9_400-449	11	116	277	2731	3.97112	4.24753	0.93	266	2615	[[11, 266], [116, 2615]]	1
Bin10_450-499	13	91	277	2731	4.69314	3.33211	1.41	264	2640	[[13, 264], [91, 2640]]	0.227482
Slipped_motifs_Bin0	0	9	277	2731	0	0.32955	0	277	2722	[[0, 277], [9, 2722]]	1			7.94224	15.9648
Bin1_1-49	2	30	277	2731	0.722022	1.0985	0.66	275	2701	[[2, 275], [30, 2701]]	0.763563			22	436
Bin2_50-99	1	182	277	2731	0.361011	6.66423	0.05	276	2549	[[1, 276], [182, 2549]]	4.57963e-07	****		255	-159
Bin3_100-149	0	19	277	2731	0	0.695716	0	277	2712	[[0, 277], [19, 2712]]	0.249076
Bin4_150-199	1	36	277	2731	0.361011	1.3182	0.27	276	2695	[[1, 276], [36, 2695]]	0.250691
Bin5_200-249	3	24	277	2731	1.08303	0.878799	1.23	274	2707	[[3, 274], [24, 2707]]	0.733183
Bin6_250-299	7	18	277	2731	2.52708	0.659099	3.83	270	2713	[[7, 270], [18, 2713]]	0.00584637	**
Bin7_300-349	2	29	277	2731	0.722022	1.06188	0.68	275	2702	[[2, 275], [29, 2702]]	1
Bin8_350-399	3	33	277	2731	1.08303	1.20835	0.9	274	2698	[[3, 274], [33, 2698]]	1
Bin9_400-449	2	21	277	2731	0.722022	0.768949	0.94	275	2710	[[2, 275], [21, 2710]]	1
Bin10_450-499	1	35	277	2731	0.361011	1.28158	0.28	276	2696	[[1, 276], [35, 2696]]	0.249602
Triplex_motifs_Bin0	0	3	277	2731	0	0.10985	0	277	2728	[[0, 277], [3, 2728]]	1			1.08303	2.197
Bin1_1-49	1	5	277	2731	0.361011	0.183083	1.97	276	2726	[[1, 276], [5, 2726]]	0.440187			3	60
Bin2_50-99	0	4	277	2731	0	0.146466	0	277	2727	[[0, 277], [4, 2727]]	1			274	217
Bin3_100-149	1	3	277	2731	0.361011	0.10985	3.29	276	2728	[[1, 276], [3, 2728]]	0.320659
Bin4_150-199	0	5	277	2731	0	0.183083	0	277	2726	[[0, 277], [5, 2726]]	1
Bin5_200-249	0	4	277	2731	0	0.146466	0	277	2727	[[0, 277], [4, 2727]]	1
Bin6_250-299	1	2	277	2731	0.361011	0.0732332	4.93	276	2729	[[1, 276], [2, 2729]]	0.251679
Bin7_300-349	0	4	277	2731	0	0.146466	0	277	2727	[[0, 277], [4, 2727]]	1
Bin8_350-399	0	9	277	2731	0	0.32955	0	277	2722	[[0, 277], [9, 2722]]	1
Bin9_400-449	0	12	277	2731	0	0.439399	0	277	2719	[[0, 277], [12, 2719]]	0.617484
Bin10_450-499	0	9	277	2731	0	0.32955	0	277	2722	[[0, 277], [9, 2722]]	1
Z-DNA_motifs_Bin0	0	3	277	2731	0	0.10985	0	277	2728	[[0, 277], [3, 2728]]	1			8.30325	11.4244
Bin1_1-49	2	34	277	2731	0.722022	1.24497	0.58	275	2697	[[2, 275], [34, 2697]]	0.768765			23	312
Bin2_50-99	1	26	277	2731	0.361011	0.952032	0.38	276	2705	[[1, 276], [26, 2705]]	0.507304			254	-35
Bin3_100-149	3	27	277	2731	1.08303	0.988649	1.1	274	2704	[[3, 274], [27, 2704]]	0.752686
Bin4_150-199	2	38	277	2731	0.722022	1.39143	0.52	275	2693	[[2, 275], [38, 2693]]	0.578403
Bin5_200-249	2	36	277	2731	0.722022	1.3182	0.55	275	2695	[[2, 275], [36, 2695]]	0.574711
Bin6_250-299	2	27	277	2731	0.722022	0.988649	0.73	275	2704	[[2, 275], [27, 2704]]	1
Bin7_300-349	1	30	277	2731	0.361011	1.0985	0.33	276	2701	[[1, 276], [30, 2701]]	0.356658
Bin8_350-399	6	32	277	2731	2.16606	1.17173	1.85	271	2699	[[6, 271], [32, 2699]]	0.155979
Bin9_400-449	2	30	277	2731	0.722022	1.0985	0.66	275	2701	[[2, 275], [30, 2701]]	0.763563
Bin10_450-499	2	29	277	2731	0.722022	1.06188	0.68	275	2702	[[2, 275], [29, 2702]]	1

## Sheet: BIDvsMRC_NonB_stats
Features	BID (x)	Random (r)	Testtotal	Randomtotal	x%	r%	fold	x_diff	r_diff	Table1	fisher	sig_rank		x%sum	x%sum
A_Phased_motifs_Bin0	7	112	2949	29153	0.237369	0.38418	0.62	2942	29041	[[7, 2942], [112, 29041]]	0.264795			12.0041	14.1735
Bin1_1-49	38	430	2949	29153	1.28857	1.47498	0.87	2911	28723	[[38, 2911], [430, 28723]]	0.468187			354	4132
Bin2_50-99	31	455	2949	29153	1.0512	1.56073	0.67	2918	28698	[[31, 2918], [455, 28698]]	0.032171	*		2595	-1183
Bin3_100-149	37	424	2949	29153	1.25466	1.4544	0.86	2912	28729	[[37, 2912], [424, 28729]]	0.417356
Bin4_150-199	19	401	2949	29153	0.644286	1.3755	0.47	2930	28752	[[19, 2930], [401, 28752]]	0.000447775	***
Bin5_200-249	20	408	2949	29153	0.678196	1.39951	0.48	2929	28745	[[20, 2929], [408, 28745]]	0.000526774	***
Bin6_250-299	29	348	2949	29153	0.983384	1.1937	0.82	2920	28805	[[29, 2920], [348, 28805]]	0.369096
Bin7_300-349	49	380	2949	29153	1.66158	1.30347	1.27	2900	28773	[[49, 2900], [380, 28773]]	0.10963
Bin8_350-399	32	385	2949	29153	1.08511	1.32062	0.82	2917	28768	[[32, 2917], [385, 28768]]	0.306431
Bin9_400-449	62	393	2949	29153	2.10241	1.34806	1.56	2887	28760	[[62, 2887], [393, 28760]]	0.00179839	**
Bin10_450-499	30	396	2949	29153	1.01729	1.35835	0.75	2919	28757	[[30, 2919], [396, 28757]]	0.128801
Cruciform_motifs_Bin0	0	28	2949	29153	0	0.096045	0	2949	29125	[[0, 2949], [28, 29125]]	0.105931			3.28925	4.06476
Bin1_1-49	5	116	2949	29153	0.169549	0.397901	0.43	2944	29037	[[5, 2944], [116, 29037]]	0.0569055			97	1185
Bin2_50-99	10	119	2949	29153	0.339098	0.408191	0.83	2939	29034	[[10, 2939], [119, 29034]]	0.758991			2852	1764
Bin3_100-149	6	121	2949	29153	0.203459	0.415052	0.49	2943	29032	[[6, 2943], [121, 29032]]	0.0894087
Bin4_150-199	6	109	2949	29153	0.203459	0.373889	0.54	2943	29044	[[6, 2943], [109, 29044]]	0.19251
Bin5_200-249	5	110	2949	29153	0.169549	0.37732	0.45	2944	29043	[[5, 2944], [110, 29043]]	0.0748031
Bin6_250-299	10	105	2949	29153	0.339098	0.360169	0.94	2939	29048	[[10, 2939], [105, 29048]]	1
Bin7_300-349	26	120	2949	29153	0.881655	0.411621	2.14	2923	29033	[[26, 2923], [120, 29033]]	0.00127908	**
Bin8_350-399	21	107	2949	29153	0.712106	0.367029	1.94	2928	29046	[[21, 2928], [107, 29046]]	0.00837364	**
Bin9_400-449	4	122	2949	29153	0.135639	0.418482	0.32	2945	29031	[[4, 2945], [122, 29031]]	0.0131476	*
Bin10_450-499	4	128	2949	29153	0.135639	0.439063	0.31	2945	29025	[[4, 2945], [128, 29025]]	0.009617	**
Direct_repeats_Bin0	16	305	2949	29153	0.542557	1.0462	0.52	2933	28848	[[16, 2933], [305, 28848]]	0.00638033	**		30.7223	29.4892
Bin1_1-49	75	941	2949	29153	2.54323	3.2278	0.79	2874	28212	[[75, 2874], [941, 28212]]	0.0466616	*		906	8597
Bin2_50-99	82	857	2949	29153	2.7806	2.93966	0.95	2867	28296	[[82, 2867], [857, 28296]]	0.688006			2043	-5648
Bin3_100-149	88	863	2949	29153	2.98406	2.96024	1.01	2861	28290	[[88, 2861], [863, 28290]]	0.909347
Bin4_150-199	105	878	2949	29153	3.56053	3.0117	1.18	2844	28275	[[105, 2844], [878, 28275]]	0.103667
Bin5_200-249	86	777	2949	29153	2.91624	2.66525	1.09	2863	28376	[[86, 2863], [777, 28376]]	0.403407
Bin6_250-299	76	888	2949	29153	2.57714	3.046	0.85	2873	28265	[[76, 2873], [888, 28265]]	0.173879
Bin7_300-349	97	815	2949	29153	3.28925	2.7956	1.18	2852	28338	[[97, 2852], [815, 28338]]	0.130211
Bin8_350-399	73	765	2949	29153	2.47542	2.62409	0.94	2876	28388	[[73, 2876], [765, 28388]]	0.671568
Bin9_400-449	103	757	2949	29153	3.49271	2.59665	1.35	2846	28396	[[103, 2846], [757, 28396]]	0.00579981	**
Bin10_450-499	105	751	2949	29153	3.56053	2.57606	1.38	2844	28402	[[105, 2844], [751, 28402]]	0.00219493	**
G-quadruplex-forming_repeats_Bin0	5	59	2949	29153	0.169549	0.202381	0.84	2944	29094	[[5, 2944], [59, 29094]]	1			9.32519	8.03691
Bin1_1-49	48	190	2949	29153	1.62767	0.651734	2.5	2901	28963	[[48, 2901], [190, 28963]]	1.93116e-07	****		275	2343
Bin2_50-99	50	276	2949	29153	1.69549	0.946729	1.79	2899	28877	[[50, 2899], [276, 28877]]	0.000324057	***		2674	606
Bin3_100-149	37	237	2949	29153	1.25466	0.812952	1.54	2912	28916	[[37, 2912], [237, 28916]]	0.0200881	*
Bin4_150-199	25	248	2949	29153	0.847745	0.850684	1	2924	28905	[[25, 2924], [248, 28905]]	1
Bin5_200-249	16	225	2949	29153	0.542557	0.77179	0.7	2933	28928	[[16, 2933], [225, 28928]]	0.216616
Bin6_250-299	21	218	2949	29153	0.712106	0.747779	0.95	2928	28935	[[21, 2928], [218, 28935]]	0.910749
Bin7_300-349	24	204	2949	29153	0.813835	0.699756	1.16	2925	28949	[[24, 2925], [204, 28949]]	0.488857
Bin8_350-399	13	237	2949	29153	0.440827	0.812952	0.54	2936	28916	[[13, 2936], [237, 28916]]	0.0272703	*
Bin9_400-449	21	229	2949	29153	0.712106	0.785511	0.91	2928	28924	[[21, 2928], [229, 28924]]	0.742095
Bin10_450-499	15	220	2949	29153	0.508647	0.754639	0.67	2934	28933	[[15, 2934], [220, 28933]]	0.172137
Inverted_repeats_Bin0	104	1533	2949	29153	3.52662	5.25846	0.67	2845	27620	[[104, 2845], [1533, 27620]]	2.38377e-05	****		90.4713	88.2516
Bin1_1-49	553	5416	2949	29153	18.7521	18.5778	1.01	2396	23737	[[553, 2396], [5416, 23737]]	0.82314			2668	25728
Bin2_50-99	385	4242	2949	29153	13.0553	14.5508	0.9	2564	24911	[[385, 2564], [4242, 24911]]	0.0277301	*		281	-22779
Bin3_100-149	298	3415	2949	29153	10.1051	11.7141	0.86	2651	25738	[[298, 2651], [3415, 25738]]	0.00934137	**
Bin4_150-199	211	2833	2949	29153	7.15497	9.7177	0.74	2738	26320	[[211, 2738], [2833, 26320]]	3.21343e-06	****
Bin5_200-249	238	2153	2949	29153	8.07053	7.38517	1.09	2711	27000	[[238, 2711], [2153, 27000]]	0.185104
Bin6_250-299	163	1807	2949	29153	5.5273	6.19833	0.89	2786	27346	[[163, 2786], [1807, 27346]]	0.158689
Bin7_300-349	290	1417	2949	29153	9.83384	4.86056	2.02	2659	27736	[[290, 2659], [1417, 27736]]	1.66883e-25	****
Bin8_350-399	188	1200	2949	29153	6.37504	4.11621	1.55	2761	27953	[[188, 2761], [1200, 27953]]	5.37797e-08	****
Bin9_400-449	129	939	2949	29153	4.37436	3.22094	1.36	2820	28214	[[129, 2820], [939, 28214]]	0.00144144	**
Bin10_450-499	109	773	2949	29153	3.69617	2.65153	1.39	2840	28380	[[109, 2840], [773, 28380]]	0.00139148	**
Mirror_repeats_Bin0	53	781	2949	29153	1.79722	2.67897	0.67	2896	28372	[[53, 2896], [781, 28372]]	0.00347099	**		34.3845	39.4676
Bin1_1-49	142	1293	2949	29153	4.81519	4.43522	1.09	2807	27860	[[142, 2807], [1293, 27860]]	0.349527			1014	11506
Bin2_50-99	146	1246	2949	29153	4.95083	4.274	1.16	2803	27907	[[146, 2803], [1246, 27907]]	0.0876231			1935	-8557
Bin3_100-149	77	1221	2949	29153	2.61105	4.18825	0.62	2872	27932	[[77, 2872], [1221, 27932]]	1.49663e-05	****
Bin4_150-199	122	1131	2949	29153	4.137	3.87953	1.07	2827	28022	[[122, 2827], [1131, 28022]]	0.484889
Bin5_200-249	92	1018	2949	29153	3.1197	3.49192	0.89	2857	28135	[[92, 2857], [1018, 28135]]	0.314933
Bin6_250-299	85	1110	2949	29153	2.88233	3.8075	0.76	2864	28043	[[85, 2864], [1110, 28043]]	0.0106299	*
Bin7_300-349	65	1032	2949	29153	2.20414	3.53994	0.62	2884	28121	[[65, 2884], [1032, 28121]]	7.86819e-05	****
Bin8_350-399	89	918	2949	29153	3.01797	3.1489	0.96	2860	28235	[[89, 2860], [918, 28235]]	0.739532
Bin9_400-449	69	926	2949	29153	2.33978	3.17635	0.74	2880	28227	[[69, 2880], [926, 28227]]	0.0119779	*
Bin10_450-499	74	830	2949	29153	2.50933	2.84705	0.88	2875	28323	[[74, 2875], [830, 28323]]	0.320548
Short_Tandem_repeats_Bin0	35	419	2949	29153	1.18684	1.43724	0.83	2914	28734	[[35, 2914], [419, 28734]]	0.325386			51.136	57.1708
Bin1_1-49	213	2321	2949	29153	7.22279	7.96144	0.91	2736	26832	[[213, 2736], [2321, 26832]]	0.162266			1508	16667
Bin2_50-99	165	2042	2949	29153	5.59512	7.00442	0.8	2784	27111	[[165, 2784], [2042, 27111]]	0.00367531	**		1441	-13718
Bin3_100-149	177	1919	2949	29153	6.00203	6.58251	0.91	2772	27234	[[177, 2772], [1919, 27234]]	0.240546
Bin4_150-199	186	1840	2949	29153	6.30722	6.31153	1	2763	27313	[[186, 2763], [1840, 27313]]	1
Bin5_200-249	124	1594	2949	29153	4.20482	5.4677	0.77	2825	27559	[[124, 2825], [1594, 27559]]	0.00304116	**
Bin6_250-299	165	1592	2949	29153	5.59512	5.46084	1.02	2784	27561	[[165, 2784], [1592, 27561]]	0.766147
Bin7_300-349	139	1389	2949	29153	4.71346	4.76452	0.99	2810	27764	[[139, 2810], [1389, 27764]]	0.963795
Bin8_350-399	123	1265	2949	29153	4.17091	4.33918	0.96	2826	27888	[[123, 2826], [1265, 27888]]	0.703977
Bin9_400-449	89	1197	2949	29153	3.01797	4.10592	0.74	2860	27956	[[89, 2860], [1197, 27956]]	0.00359742	**
Bin10_450-499	92	1089	2949	29153	3.1197	3.73546	0.84	2857	28064	[[92, 2857], [1089, 28064]]	0.100206
Slipped_motifs_Bin0	5	57	2949	29153	0.169549	0.19552	0.87	2944	29096	[[5, 2944], [57, 29096]]	1			11.665	8.57202
Bin1_1-49	18	236	2949	29153	0.610376	0.809522	0.75	2931	28917	[[18, 2931], [236, 28917]]	0.275916			344	2499
Bin2_50-99	28	234	2949	29153	0.949474	0.802662	1.18	2921	28919	[[28, 2921], [234, 28919]]	0.389765			2605	450
Bin3_100-149	13	249	2949	29153	0.440827	0.854114	0.52	2936	28904	[[13, 2936], [249, 28904]]	0.0174197	*
Bin4_150-199	20	236	2949	29153	0.678196	0.809522	0.84	2929	28917	[[20, 2929], [236, 28917]]	0.514574
Bin5_200-249	19	226	2949	29153	0.644286	0.77522	0.83	2930	28927	[[19, 2930], [226, 28927]]	0.505406
Bin6_250-299	36	274	2949	29153	1.22075	0.939869	1.3	2913	28879	[[36, 2913], [274, 28879]]	0.138139
Bin7_300-349	58	249	2949	29153	1.96677	0.854114	2.3	2891	28904	[[58, 2891], [249, 28904]]	1.33137e-07	****
Bin8_350-399	26	253	2949	29153	0.881655	0.867835	1.02	2923	28900	[[26, 2923], [253, 28900]]	0.917023
Bin9_400-449	77	245	2949	29153	2.61105	0.840394	3.11	2872	28908	[[77, 2872], [245, 28908]]	3.39562e-15	****
Bin10_450-499	44	240	2949	29153	1.49203	0.823243	1.81	2905	28913	[[44, 2905], [240, 28913]]	0.000592399	***
Triplex_motifs_Bin0	1	21	2949	29153	0.0339098	0.0720338	0.47	2948	29132	[[1, 2948], [21, 29132]]	0.716164			1.45812	2.432
Bin1_1-49	12	58	2949	29153	0.406918	0.19895	2.05	2937	29095	[[12, 2937], [58, 29095]]	0.034358	*		43	709
Bin2_50-99	6	68	2949	29153	0.203459	0.233252	0.87	2943	29085	[[6, 2943], [68, 29085]]	1			2906	2240
Bin3_100-149	2	63	2949	29153	0.0678196	0.216101	0.31	2947	29090	[[2, 2947], [63, 29090]]	0.126669
Bin4_150-199	0	70	2949	29153	0	0.240113	0	2949	29083	[[0, 2949], [70, 29083]]	0.00266582	**
Bin5_200-249	5	55	2949	29153	0.169549	0.18866	0.9	2944	29098	[[5, 2944], [55, 29098]]	1
Bin6_250-299	1	77	2949	29153	0.0339098	0.264124	0.13	2948	29076	[[1, 2948], [77, 29076]]	0.00932526	**
Bin7_300-349	3	81	2949	29153	0.101729	0.277844	0.37	2946	29072	[[3, 2946], [81, 29072]]	0.086259
Bin8_350-399	5	66	2949	29153	0.169549	0.226392	0.75	2944	29087	[[5, 2944], [66, 29087]]	0.681737
Bin9_400-449	3	81	2949	29153	0.101729	0.277844	0.37	2946	29072	[[3, 2946], [81, 29072]]	0.086259
Bin10_450-499	5	69	2949	29153	0.169549	0.236682	0.72	2944	29084	[[5, 2944], [69, 29084]]	0.684793
Z-DNA_motifs_Bin0	3	59	2949	29153	0.101729	0.202381	0.5	2946	29094	[[3, 2946], [59, 29094]]	0.373664			6.44286	10.1636
Bin1_1-49	12	294	2949	29153	0.406918	1.00847	0.4	2937	28859	[[12, 2937], [294, 28859]]	0.00064909	***		190	2963
Bin2_50-99	20	298	2949	29153	0.678196	1.02219	0.66	2929	28855	[[20, 2929], [298, 28855]]	0.0784023			2759	-14
Bin3_100-149	18	290	2949	29153	0.610376	0.994752	0.61	2931	28863	[[18, 2931], [290, 28863]]	0.0464998	*
Bin4_150-199	16	294	2949	29153	0.542557	1.00847	0.54	2933	28859	[[16, 2933], [294, 28859]]	0.0129925	*
Bin5_200-249	15	315	2949	29153	0.508647	1.08051	0.47	2934	28838	[[15, 2934], [315, 28838]]	0.00204965	**
Bin6_250-299	12	282	2949	29153	0.406918	0.96731	0.42	2937	28871	[[12, 2937], [282, 28871]]	0.00110765	**
Bin7_300-349	26	276	2949	29153	0.881655	0.946729	0.93	2923	28877	[[26, 2923], [276, 28877]]	0.841129
Bin8_350-399	27	282	2949	29153	0.915565	0.96731	0.95	2922	28871	[[27, 2922], [282, 28871]]	0.921031
Bin9_400-449	23	288	2949	29153	0.779925	0.987891	0.79	2926	28865	[[23, 2926], [288, 28865]]	0.323151
Bin10_450-499	18	285	2949	29153	0.610376	0.977601	0.62	2931	28868	[[18, 2931], [285, 28868]]	0.0566021

## Sheet: A77VvsMRC_NonB_stats
Features	A77V (x)	Random (r)	Testtotal	Randomtotal	x%	r%	fold	x_diff	r_diff	Table1	fisher	sig_rank		x%sum	x%sum
A_Phased_motifs_Bin0	3	175	4431	43811	0.0677048	0.399443	0.17	4428	43636	[[3, 4428], [175, 43636]]	7.19712e-05	****		13.3378	13.8869
Bin1_1-49	54	675	4431	43811	1.21869	1.54071	0.79	4377	43136	[[54, 4377], [675, 43136]]	0.105775			591	6084
Bin2_50-99	54	607	4431	43811	1.21869	1.3855	0.88	4377	43204	[[54, 4377], [607, 43204]]	0.415416			3840	-1653
Bin3_100-149	59	590	4431	43811	1.33153	1.34669	0.99	4372	43221	[[59, 4372], [590, 43221]]	1
Bin4_150-199	43	608	4431	43811	0.970436	1.38778	0.7	4388	43203	[[43, 4388], [608, 43203]]	0.0200593	*
Bin5_200-249	41	597	4431	43811	0.925299	1.36267	0.68	4390	43214	[[41, 4390], [597, 43214]]	0.0129396	*
Bin6_250-299	57	585	4431	43811	1.28639	1.33528	0.96	4374	43226	[[57, 4374], [585, 43226]]	0.836649
Bin7_300-349	77	586	4431	43811	1.73776	1.33756	1.3	4354	43225	[[77, 4354], [586, 43225]]	0.0354521	*
Bin8_350-399	60	596	4431	43811	1.3541	1.36039	1	4371	43215	[[60, 4371], [596, 43215]]	1
Bin9_400-449	98	527	4431	43811	2.21169	1.20289	1.84	4333	43284	[[98, 4333], [527, 43284]]	1.91024e-07	****
Bin10_450-499	45	538	4431	43811	1.01557	1.228	0.83	4386	43273	[[45, 4386], [538, 43273]]	0.247908
Cruciform_motifs_Bin0	0	58	4431	43811	0	0.132387	0	4431	43753	[[0, 4431], [58, 43753]]	0.00570845	**		2.82103	4.1428
Bin1_1-49	6	186	4431	43811	0.13541	0.424551	0.32	4425	43625	[[6, 4425], [186, 43625]]	0.00159723	**		125	1815
Bin2_50-99	25	155	4431	43811	0.564207	0.353792	1.59	4406	43656	[[25, 4406], [155, 43656]]	0.0373315	*		4306	2616
Bin3_100-149	6	177	4431	43811	0.13541	0.404008	0.34	4425	43634	[[6, 4425], [177, 43634]]	0.00294942	**
Bin4_150-199	3	161	4431	43811	0.0677048	0.367488	0.18	4428	43650	[[3, 4428], [161, 43650]]	0.000207731	***
Bin5_200-249	14	158	4431	43811	0.315956	0.36064	0.88	4417	43653	[[14, 4417], [158, 43653]]	0.79079
Bin6_250-299	9	202	4431	43811	0.203114	0.461071	0.44	4422	43609	[[9, 4422], [202, 43609]]	0.0114378	*
Bin7_300-349	28	184	4431	43811	0.631912	0.419986	1.5	4403	43627	[[28, 4403], [184, 43627]]	0.0550708
Bin8_350-399	16	187	4431	43811	0.361092	0.426833	0.85	4415	43624	[[16, 4415], [187, 43624]]	0.625713
Bin9_400-449	11	191	4431	43811	0.248251	0.435964	0.57	4420	43620	[[11, 4420], [191, 43620]]	0.066721
Bin10_450-499	7	156	4431	43811	0.157978	0.356075	0.44	4424	43655	[[7, 4424], [156, 43655]]	0.0287149	*
Direct_repeats_Bin0	22	533	4431	43811	0.496502	1.21659	0.41	4409	43278	[[22, 4409], [533, 43278]]	2.76212e-06	****		29.2936	29.9674
Bin1_1-49	111	1404	4431	43811	2.50508	3.20467	0.78	4320	42407	[[111, 4320], [1404, 42407]]	0.00994867	**		1298	13129
Bin2_50-99	127	1359	4431	43811	2.86617	3.10196	0.92	4304	42452	[[127, 4304], [1359, 42452]]	0.411559			3133	-8698
Bin3_100-149	121	1385	4431	43811	2.73076	3.16131	0.86	4310	42426	[[121, 4310], [1385, 42426]]	0.123169
Bin4_150-199	142	1328	4431	43811	3.20469	3.0312	1.06	4289	42483	[[142, 4289], [1328, 42483]]	0.520761
Bin5_200-249	127	1323	4431	43811	2.86617	3.01979	0.95	4304	42488	[[127, 4304], [1323, 42488]]	0.611503
Bin6_250-299	114	1179	4431	43811	2.57278	2.6911	0.96	4317	42632	[[114, 4317], [1179, 42632]]	0.696112
Bin7_300-349	164	1318	4431	43811	3.7012	3.00838	1.23	4267	42493	[[164, 4267], [1318, 42493]]	0.013531	*
Bin8_350-399	119	1111	4431	43811	2.68562	2.53589	1.06	4312	42700	[[119, 4312], [1111, 42700]]	0.548314
Bin9_400-449	131	1082	4431	43811	2.95644	2.4697	1.2	4300	42729	[[131, 4300], [1082, 42729]]	0.0554836
Bin10_450-499	120	1107	4431	43811	2.70819	2.52676	1.07	4311	42704	[[120, 4311], [1107, 42704]]	0.452779
G-quadruplex-forming_repeats_Bin0	4	103	4431	43811	0.0902731	0.235101	0.38	4427	43708	[[4, 4427], [103, 43708]]	0.0622602			10.8328	8.38602
Bin1_1-49	72	374	4431	43811	1.62492	0.853667	1.9	4359	43437	[[72, 4359], [374, 43437]]	3.0859e-06	****		480	3674
Bin2_50-99	106	394	4431	43811	2.39224	0.899318	2.66	4325	43417	[[106, 4325], [394, 43417]]	2.85373e-16	****		3951	757
Bin3_100-149	67	367	4431	43811	1.51207	0.837689	1.81	4364	43444	[[67, 4364], [367, 43444]]	2.59051e-05	****
Bin4_150-199	45	407	4431	43811	1.01557	0.92899	1.09	4386	43404	[[45, 4386], [407, 43404]]	0.566443
Bin5_200-249	42	319	4431	43811	0.947867	0.728128	1.3	4389	43492	[[42, 4389], [319, 43492]]	0.118955
Bin6_250-299	33	340	4431	43811	0.744753	0.776061	0.96	4398	43471	[[33, 4398], [340, 43471]]	0.928212
Bin7_300-349	37	355	4431	43811	0.835026	0.810299	1.03	4394	43456	[[37, 4394], [355, 43456]]	0.860436
Bin8_350-399	21	354	4431	43811	0.473934	0.808016	0.59	4410	43457	[[21, 4410], [354, 43457]]	0.0149519	*
Bin9_400-449	33	331	4431	43811	0.744753	0.755518	0.99	4398	43480	[[33, 4398], [331, 43480]]	1
Bin10_450-499	20	330	4431	43811	0.451365	0.753235	0.6	4411	43481	[[20, 4411], [330, 43481]]	0.0251699	*
Inverted_repeats_Bin0	165	2272	4431	43811	3.72376	5.18591	0.72	4266	41539	[[165, 4266], [2272, 41539]]	1.28798e-05	****		89.2575	88.2176
Bin1_1-49	793	8173	4431	43811	17.8966	18.6551	0.96	3638	35638	[[793, 3638], [8173, 35638]]	0.224049			3955	38649
Bin2_50-99	628	6253	4431	43811	14.1729	14.2727	0.99	3803	37558	[[628, 3803], [6253, 37558]]	0.874638			476	-34218
Bin3_100-149	453	5152	4431	43811	10.2234	11.7596	0.87	3978	38659	[[453, 3978], [5152, 38659]]	0.00227849	**
Bin4_150-199	367	4170	4431	43811	8.28255	9.51816	0.87	4064	39641	[[367, 4064], [4170, 39641]]	0.00691129	**
Bin5_200-249	356	3307	4431	43811	8.0343	7.54833	1.06	4075	40504	[[356, 4075], [3307, 40504]]	0.24581
Bin6_250-299	236	2723	4431	43811	5.32611	6.21533	0.86	4195	41088	[[236, 4195], [2723, 41088]]	0.0180027	*
Bin7_300-349	380	2228	4431	43811	8.57594	5.08548	1.69	4051	41583	[[380, 4051], [2228, 41583]]	5.40674e-20	****
Bin8_350-399	267	1802	4431	43811	6.02573	4.11312	1.47	4164	42009	[[267, 4164], [1802, 42009]]	1.20718e-08	****
Bin9_400-449	170	1387	4431	43811	3.83661	3.16587	1.21	4261	42424	[[170, 4261], [1387, 42424]]	0.018022	*
Bin10_450-499	140	1182	4431	43811	3.15956	2.69795	1.17	4291	42629	[[140, 4291], [1182, 42629]]	0.0740596
Mirror_repeats_Bin0	49	1198	4431	43811	1.10585	2.73447	0.4	4382	42613	[[49, 4382], [1198, 42613]]	7.70926e-13	****		33.4687	39.8393
Bin1_1-49	165	1897	4431	43811	3.72376	4.32996	0.86	4266	41914	[[165, 4266], [1897, 41914]]	0.0612801			1483	17454
Bin2_50-99	220	1893	4431	43811	4.96502	4.32083	1.15	4211	41918	[[220, 4211], [1893, 41918]]	0.0493877	*		2948	-13023
Bin3_100-149	152	1876	4431	43811	3.43038	4.28203	0.8	4279	41935	[[152, 4279], [1876, 41935]]	0.00667782	**
Bin4_150-199	193	1807	4431	43811	4.35568	4.12453	1.06	4238	42004	[[193, 4238], [1807, 42004]]	0.452587
Bin5_200-249	140	1616	4431	43811	3.15956	3.68857	0.86	4291	42195	[[140, 4291], [1616, 42195]]	0.0769743
Bin6_250-299	122	1537	4431	43811	2.75333	3.50825	0.78	4309	42274	[[122, 4309], [1537, 42274]]	0.00825639	**
Bin7_300-349	115	1596	4431	43811	2.59535	3.64292	0.71	4316	42215	[[115, 4316], [1596, 42215]]	0.00020598	***
Bin8_350-399	109	1409	4431	43811	2.45994	3.21609	0.76	4322	42402	[[109, 4322], [1409, 42402]]	0.00509767	**
Bin9_400-449	116	1338	4431	43811	2.61792	3.05403	0.86	4315	42473	[[116, 4315], [1338, 42473]]	0.116757
Bin10_450-499	102	1287	4431	43811	2.30196	2.93762	0.78	4329	42524	[[102, 4329], [1287, 42524]]	0.016095	*
Short_Tandem_repeats_Bin0	46	678	4431	43811	1.03814	1.54756	0.67	4385	43133	[[46, 4385], [678, 43133]]	0.00640099	**		49.9661	58.006
Bin1_1-49	335	3555	4431	43811	7.56037	8.1144	0.93	4096	40256	[[335, 4096], [3555, 40256]]	0.202765			2214	25413
Bin2_50-99	277	3163	4431	43811	6.25141	7.21965	0.87	4154	40648	[[277, 4154], [3163, 40648]]	0.0168495	*		2217	-20982
Bin3_100-149	235	3049	4431	43811	5.30354	6.95944	0.76	4196	40762	[[235, 4196], [3049, 40762]]	2.03191e-05	****
Bin4_150-199	271	2820	4431	43811	6.116	6.43674	0.95	4160	40991	[[271, 4160], [2820, 40991]]	0.421055
Bin5_200-249	197	2359	4431	43811	4.44595	5.38449	0.83	4234	41452	[[197, 4234], [2359, 41452]]	0.00745185	**
Bin6_250-299	180	2279	4431	43811	4.06229	5.20189	0.78	4251	41532	[[180, 4251], [2279, 41532]]	0.000848771	***
Bin7_300-349	198	2160	4431	43811	4.46852	4.93027	0.91	4233	41651	[[198, 4233], [2160, 41651]]	0.188018
Bin8_350-399	189	1863	4431	43811	4.2654	4.25236	1	4242	41948	[[189, 4242], [1863, 41948]]	0.968838
Bin9_400-449	156	1796	4431	43811	3.52065	4.09943	0.86	4275	42015	[[156, 4275], [1796, 42015]]	0.0656156
Bin10_450-499	130	1691	4431	43811	2.93387	3.85976	0.76	4301	42120	[[130, 4301], [1691, 42120]]	0.00165542	**
Slipped_motifs_Bin0	9	130	4431	43811	0.203114	0.296729	0.68	4422	43681	[[9, 4422], [130, 43681]]	0.305816			10.6297	8.82655
Bin1_1-49	19	352	4431	43811	0.428797	0.803451	0.53	4412	43459	[[19, 4412], [352, 43459]]	0.00495148	**		471	3867
Bin2_50-99	29	400	4431	43811	0.65448	0.913013	0.72	4402	43411	[[29, 4402], [400, 43411]]	0.0923301			3960	564
Bin3_100-149	19	352	4431	43811	0.428797	0.803451	0.53	4412	43459	[[19, 4412], [352, 43459]]	0.00495148	**
Bin4_150-199	23	361	4431	43811	0.51907	0.823994	0.63	4408	43450	[[23, 4408], [361, 43450]]	0.026512	*
Bin5_200-249	24	377	4431	43811	0.541638	0.860514	0.63	4407	43434	[[24, 4407], [377, 43434]]	0.0237578	*
Bin6_250-299	58	385	4431	43811	1.30896	0.878775	1.49	4373	43426	[[58, 4373], [385, 43426]]	0.00621176	**
Bin7_300-349	81	408	4431	43811	1.82803	0.931273	1.96	4350	43403	[[81, 4350], [408, 43403]]	2.23925e-07	****
Bin8_350-399	50	374	4431	43811	1.12841	0.853667	1.32	4381	43437	[[50, 4381], [374, 43437]]	0.0753448
Bin9_400-449	93	385	4431	43811	2.09885	0.878775	2.39	4338	43426	[[93, 4338], [385, 43426]]	4.41551e-12	****
Bin10_450-499	66	343	4431	43811	1.48951	0.782908	1.9	4365	43468	[[66, 4365], [343, 43468]]	6.4818e-06	****
Triplex_motifs_Bin0	0	41	4431	43811	0	0.0935838	0	4431	43770	[[0, 4431], [41, 43770]]	0.0299837	*		1.37666	2.45829
Bin1_1-49	14	104	4431	43811	0.315956	0.237383	1.33	4417	43707	[[14, 4417], [104, 43707]]	0.335298			61	1077
Bin2_50-99	4	82	4431	43811	0.0902731	0.187168	0.48	4427	43729	[[4, 4427], [82, 43729]]	0.188548			4370	3354
Bin3_100-149	4	106	4431	43811	0.0902731	0.241948	0.37	4427	43705	[[4, 4427], [106, 43705]]	0.0453887	*
Bin4_150-199	1	106	4431	43811	0.0225683	0.241948	0.09	4430	43705	[[1, 4430], [106, 43705]]	0.000645862	***
Bin5_200-249	5	99	4431	43811	0.112841	0.225971	0.5	4426	43712	[[5, 4426], [99, 43712]]	0.170269
Bin6_250-299	7	106	4431	43811	0.157978	0.241948	0.65	4424	43705	[[7, 4424], [106, 43705]]	0.328835
Bin7_300-349	3	122	4431	43811	0.0677048	0.278469	0.24	4428	43689	[[3, 4428], [122, 43689]]	0.00469593	**
Bin8_350-399	10	86	4431	43811	0.225683	0.196298	1.15	4421	43725	[[10, 4421], [86, 43725]]	0.59782
Bin9_400-449	6	104	4431	43811	0.13541	0.237383	0.57	4425	43707	[[6, 4425], [104, 43707]]	0.24411
Bin10_450-499	7	121	4431	43811	0.157978	0.276186	0.57	4424	43690	[[7, 4424], [121, 43690]]	0.16785
Z-DNA_motifs_Bin0	4	75	4431	43811	0.0902731	0.17119	0.53	4427	43736	[[4, 4427], [75, 43736]]	0.24513			7.24441	10.1573
Bin1_1-49	22	445	4431	43811	0.496502	1.01573	0.49	4409	43366	[[22, 4409], [445, 43366]]	0.000368559	***		321	4450
Bin2_50-99	29	465	4431	43811	0.65448	1.06138	0.62	4402	43346	[[29, 4402], [465, 43346]]	0.00951037	**		4110	-19
Bin3_100-149	27	419	4431	43811	0.609343	0.956381	0.64	4404	43392	[[27, 4404], [419, 43392]]	0.0207277	*
Bin4_150-199	35	444	4431	43811	0.789889	1.01344	0.78	4396	43367	[[35, 4396], [444, 43367]]	0.175861
Bin5_200-249	20	452	4431	43811	0.451365	1.0317	0.44	4411	43359	[[20, 4411], [452, 43359]]	5.57546e-05	****
Bin6_250-299	23	445	4431	43811	0.51907	1.01573	0.51	4408	43366	[[23, 4408], [445, 43366]]	0.000693087	***
Bin7_300-349	42	449	4431	43811	0.947867	1.02486	0.92	4389	43362	[[42, 4389], [449, 43362]]	0.694519
Bin8_350-399	31	410	4431	43811	0.699616	0.935838	0.75	4400	43401	[[31, 4400], [410, 43401]]	0.135193
Bin9_400-449	53	430	4431	43811	1.19612	0.981489	1.22	4378	43381	[[53, 4378], [430, 43381]]	0.177737
Bin10_450-499	35	416	4431	43811	0.789889	0.949533	0.83	4396	43395	[[35, 4396], [416, 43395]]	0.32567
