# Supplementary material for: G-Quadruplex DNA and Other Non-Canonical B-Form DNA Motifs Influence Productive and Latent HIV-1 Integration and Reactivation Potential
Source: Viruses. 2022 Nov 11;14(11):2494. doi: 10.3390/v14112494 (PMC9692945; doi:10.3390/v14112494)
Supplement: Supplementary file 1 [file viruses-14-02494-s001.zip › Table S5 - Telomeres.xlsx]

## Sheet: Telomere Locations
Table S5a: List of telomere coordinates.
	Telomere Chromosomal Locations
Chromosome	Start (hg19)	End (hg19)	The extracted locations of the human telomere regions was obtained from the UCSC Genome Browser and provided below for the genome assembly GRCh37 (hg19). The coordinates are given in the 0-based UCSC coordinated system.
chr1	0	10000
chr1	249240621	249250621
chr2	0	10000
chr2	243189373	243199373
chr3	0	10000
chr3	198012430	198022430
chr4	0	10000
chr4	191144276	191154276
chr5	0	10000
chr5	180905260	180915260
chr6	0	10000
chr6	171105067	171115067
chr7	0	10000
chr7	159128663	159138663
chr8	0	10000
chr8	146354022	146364022
chr9	0	10000
chr9	141203431	141213431
chr10	0	10000
chr10	135524747	135534747
chr11	0	10000
chr11	134996516	135006516
chr12	0	10000
chr12	133841895	133851895
chr13	0	10000
chr13	115159878	115169878
chr14	0	10000
chr14	107339540	107349540
chr15	0	10000
chr15	102521392	102531392
chr16	0	10000
chr16	90344753	90354753
chr17	NA	NA	Telomeres of chromosome 17 have not been defined for assembly GRCh37. They are short, but do exist nonetheless.
chr17	NA	NA
chr18	0	10000
chr18	78067248	78077248
chr19	0	10000
chr19	59118983	59128983
chr20	0	10000
chr20	63015520	63025520
chr21	0	10000
chr21	48119895	48129895
chr22	0	10000
chr22	51294566	51304566
chrX	0	10000
chrX	155260560	155270560
chrY	0	10000
chrY	59363566	59373566

## Sheet: No_G4compds
Table S5b: List of integration sites in telomeres after no G4 ligand treatment.
NO DRUG Treatment				Telomere Chromosomal Locations
Chromosome	Integration site location		Chromosome	Start (hg19)	End (hg19)	# integration sites
chr1	27170295		chr1	0	10000	0
chr1	27170297		chr1	249240621	249250621	0
chr1	27170299		chr2	0	10000	0
chr1	27170500		chr2	243189373	243199373	0
chr1	35835530		chr3	0	10000	0
chr1	35858466		chr3	198012430	198022430	0
chr1	91314407		chr4	0	10000	0
chr1	100381100		chr4	191144276	191154276	0
chr1	100688231		chr5	0	10000	0
chr1	103299268		chr5	180905260	180915260	0
chr1	151618097		chr6	0	10000	0
chr1	151618146		chr6	171105067	171115067	0
chr1	155312490		chr7	0	10000	0
chr1	155312492		chr7	159128663	159138663	0
chr1	155312494		chr8	0	10000	0
chr1	171947564		chr8	146354022	146364022	0
chr1	195579375		chr9	0	10000	0
chr1	205060244		chr9	141203431	141213431	0
chr1	205060245		chr10	0	10000	0
chr1	205060247		chr10	135524747	135534747	0
chr1	205060350		chr11	0	10000	0
chr1	205060351		chr11	134996516	135006516	0
chr1	227261413		chr12	0	10000	0
chr1	227261415		chr12	133841895	133851895	0
chr1	227261417		chr13	0	10000	0
chr1	227261418		chr13	115159878	115169878	0
chr1	227261430		chr14	0	10000	0
chr1	227261439		chr14	107339540	107349540	0
chr1	227261441		chr15	0	10000	0
chr1	227261451		chr15	102521392	102531392	0
chr1	227261462		chr16	0	10000	0
chr1	227261464		chr16	90344753	90354753	0
chr1	227261465		chr17	NA	NA	0
chr1	227261466		chr17	NA	NA	0
chr10	5141806		chr18	0	10000	0
chr10	13309270		chr18	78067248	78077248	0
chr11	955847		chr19	0	10000	0
chr11	955851		chr19	59118983	59128983	0
chr11	9196017		chr20	0	10000	0
chr11	64958866		chr20	63015520	63025520	0
chr11	66902981		chr21	0	10000	0
chr11	66902982		chr21	48119895	48129895	0
chr11	66903216		chr22	0	10000	0
chr11	66903228		chr22	51294566	51304566	0
chr11	67873237		chrX	0	10000	0
chr11	74520307		chrX	155260560	155270560	0
chr11	74520312		chrY	0	10000	0
chr11	82891735		chrY	59363566	59373566	0
chr11	103748146
chr12	3040812
chr12	41427416
chr12	41427500
chr12	49885957
chr12	49885960
chr12	49885961
chr12	49885963
chr12	49885968
chr12	53413475
chr12	53413476
chr12	53413477
chr12	53413607
chr12	53413611
chr12	109061714
chr12	109061715
chr12	109061716
chr12	109061722
chr12	109061724
chr12	109061725
chr12	109061852
chr12	112691569
chr12	112691570
chr12	112691571
chr12	112691572
chr12	112691573
chr12	112691574
chr12	112691582
chr12	112691655
chr12	112691679
chr12	112691685
chr12	112691698
chr12	112691711
chr12	112691726
chr12	112691733
chr12	112691745
chr12	112691746
chr12	112691747
chr12	112691748
chr12	121225310
chr12	123213203
chr12	123213205
chr12	123213206
chr12	123213207
chr12	123213210
chr13	34438542
chr13	80121053
chr13	92365577
chr13	92365586
chr13	92365588
chr13	92365590
chr13	92365594
chr13	92365595
chr13	92365629
chr13	92365654
chr14	65370917
chr14	65370920
chr14	96790521
chr14	96790523
chr14	96790527
chr14	96790534
chr14	96790535
chr14	96790536
chr14	96790537
chr14	96790581
chr14	96790584
chr14	96790586
chr14	96790606
chr14	96790607
chr14	96790621
chr14	96790630
chr14	96790631
chr14	96790641
chr14	96790642
chr14	96790655
chr14	96790656
chr15	72368673
chr15	78841554
chr15	78841561
chr15	78841662
chr15	91530152
chr15	93388856
chr16	2403391
chr16	2403398
chr16	2403413
chr16	2403422
chr16	2403490
chr16	2403501
chr16	2403510
chr16	2403513
chr16	11797342
chr16	29087031
chr16	29087033
chr16	29087100
chr16	29087114
chr16	56970913
chr16	56970924
chr16	56970927
chr16	56970948
chr16	56970951
chr16	56970952
chr16	56970953
chr16	56970972
chr16	56970973
chr16	56970988
chr16	56971001
chr16	56971005
chr16	56971006
chr16	56971009
chr16	56971013
chr16	56971015
chr16	56971021
chr16	56971023
chr16	56971033
chr16	56971034
chr16	68042636
chr17	4201657
chr17	4201660
chr17	4201661
chr17	7783429
chr17	8264683
chr17	35111360
chr17	37668824
chr17	37668827
chr17	40499514
chr17	48400877
chr17	48400879
chr17	48401077
chr17	48401086
chr17	49039849
chr17	74203193
chr17	74203203
chr17	74327074
chr17	74327075
chr17	74327087
chr17	74327088
chr17	74327089
chr18	34500522
chr18	34500523
chr18	34500524
chr18	34500525
chr18	34500529
chr18	34500623
chr18	34500635
chr18	34500648
chr18	34500658
chr18	34500662
chr18	37056836
chr18	72350299
chr19	1016708
chr19	1016711
chr19	1016712
chr19	1016713
chr19	1016714
chr19	1016715
chr19	1016716
chr19	1016718
chr19	1016730
chr19	1016784
chr19	1016788
chr19	1016827
chr19	2529127
chr19	2529128
chr19	2529129
chr19	2529130
chr19	2529131
chr19	2529132
chr19	2529133
chr19	2529146
chr19	2916915
chr19	2916916
chr19	2916917
chr19	2916918
chr19	2916919
chr19	2916920
chr19	2916926
chr19	3570391
chr19	4373428
chr19	4405241
chr19	5617925
chr19	5617930
chr19	5617934
chr19	5617935
chr19	5617936
chr19	5617937
chr19	5617938
chr19	5617939
chr19	5617942
chr19	5617997
chr19	5618007
chr19	5618040
chr19	5618041
chr19	5618045
chr19	5618052
chr19	5618057
chr19	5618061
chr19	5618062
chr19	5618075
chr19	5618076
chr19	5618079
chr19	5618083
chr19	5618084
chr19	5618089
chr19	5618090
chr19	5618092
chr19	5618093
chr19	5618094
chr19	5618098
chr19	5618100
chr19	5618103
chr19	5618105
chr19	5618111
chr19	5618113
chr19	5618114
chr19	5618115
chr19	5618116
chr19	5618118
chr19	5618124
chr19	5618126
chr19	5618129
chr19	5618130
chr19	5618131
chr19	5618132
chr19	5618134
chr19	5618135
chr19	5618136
chr19	5618139
chr19	5618140
chr19	19628915
chr19	19628925
chr19	47187431
chr2	24747024
chr2	24747025
chr2	24747027
chr2	24747028
chr2	24747029
chr2	24747030
chr2	24747031
chr2	24747032
chr2	24747034
chr2	37507570
chr2	37507572
chr2	37507573
chr2	37507574
chr2	37507575
chr2	37507578
chr2	37507581
chr2	153000111
chr2	153000112
chr2	153000113
chr2	153000114
chr2	153000116
chr2	163873633
chr2	173593456
chr2	236632831
chr20	1102947
chr20	1102948
chr20	1102949
chr20	1102950
chr20	1102951
chr20	34240651
chr20	34240657
chr20	34240658
chr20	34240661
chr20	34240662
chr20	34240727
chr20	34240734
chr20	34240745
chr20	34240756
chr20	34240780
chr20	34240781
chr20	34240792
chr20	34240795
chr20	34240812
chr20	34240824
chr20	34240826
chr20	34240827
chr20	34240831
chr20	34240832
chr20	34240833
chr20	34240838
chr20	34240840
chr20	34240857
chr20	34240859
chr20	43872128
chr20	43872129
chr20	43872130
chr20	43872135
chr20	43872184
chr20	43872196
chr20	43872201
chr20	43872230
chr20	43872236
chr20	62890056
chr21	35168700
chr21	35168701
chr21	35168786
chr21	35168805
chr21	35168815
chr21	35168820
chr21	35168821
chr21	35168823
chr22	18182505
chr22	18182507
chr22	18182509
chr22	18182511
chr22	22177225
chr22	28357829
chr22	28357833
chr22	28357848
chr22	28357875
chr22	28357883
chr22	28357890
chr22	28357892
chr22	30340397
chr22	30340398
chr22	30340399
chr22	30340400
chr22	30340401
chr22	30340470
chr22	30340479
chr22	30340508
chr22	30340511
chr22	30340519
chr22	31926995
chr22	31927001
chr3	14225133
chr3	17443680
chr3	38283088
chr3	38684700
chr3	47748204
chr3	48986531
chr3	48986532
chr3	76071980
chr3	94939445
chr3	94939449
chr3	96710655
chr3	96710657
chr3	129489280
chr3	158202777
chr4	17891621
chr4	17891623
chr4	17891625
chr4	17891627
chr4	17891763
chr4	17891792
chr4	17891819
chr4	157859516
chr4	157859517
chr4	157859524
chr4	157859526
chr4	157859527
chr4	157859528
chr4	157859553
chr4	157859614
chr4	157859662
chr4	157859667
chr4	157859673
chr4	157859674
chr4	157859675
chr4	157859676
chr4	157859678
chr5	98233113
chr5	98233117
chr5	98233118
chr5	98233161
chr5	98233165
chr5	107484132
chr5	163574982
chr5	163574995
chr5	163574998
chr5	163574999
chr5	163575063
chr5	175926561
chr5	176906998
chr5	176906999
chr5	176907000
chr5	176907002
chr5	176907003
chr5	176907004
chr5	176907007
chr5	176907008
chr5	176907009
chr5	176907010
chr5	176907066
chr5	176907087
chr5	176907089
chr5	176907101
chr5	176907108
chr5	176907109
chr5	176907110
chr5	176907114
chr5	176907124
chr5	176907134
chr5	176907136
chr5	176907139
chr5	176907141
chr5	176907142
chr5	176907144
chr5	176907145
chr5	176907146
chr5	176907147
chr5	176907151
chr5	176907152
chr5	176907154
chr5	176907155
chr5	176907156
chr5	176907157
chr5	176907158
chr5	176907162
chr5	176907163
chr5	176907164
chr5	176907168
chr5	176907169
chr5	176907170
chr5	176907171
chr5	176907174
chr5	176907176
chr5	176907177
chr5	176907179
chr5	176907180
chr5	176907181
chr5	176907185
chr5	176907186
chr5	176907187
chr5	176907190
chr5	176907193
chr5	176907194
chr5	176907195
chr5	176907197
chr5	176907200
chr5	176907203
chr5	176907206
chr5	176907208
chr5	176907209
chr5	176907210
chr5	176907212
chr5	176907213
chr5	176907214
chr5	176907215
chr5	176907216
chr5	176907217
chr5	176907219
chr5	179046982
chr5	179046983
chr5	179046986
chr5	180251170
chr6	31700114
chr6	31700117
chr6	31700118
chr6	31876326
chr6	42626411
chr6	90458806
chr6	90458809
chr6	90458810
chr6	97715828
chr6	97715829
chr6	106666966
chr6	106666967
chr6	106666969
chr6	106666970
chr6	106666971
chr6	106666972
chr6	106666973
chr6	106666974
chr6	106666983
chr6	106666992
chr6	106666995
chr6	157166091
chr6	158314588
chr7	89294202
chr7	91619368
chr7	120586012
chr7	120586016
chr7	135650578
chr7	135650579
chr7	135650580
chr7	135650581
chr7	135650585
chr7	135650586
chr8	38935019
chr9	15697674
chr9	15697675
chr9	15697676
chr9	139717912
chr1	1351208
chr1	32940223
chr1	36499891
chr1	36499892
chr1	36499893
chr1	36499894
chr1	36499896
chr1	36499897
chr1	36499899
chr1	36499904
chr1	36499912
chr1	44215826
chr1	44215828
chr1	44916357
chr1	52742050
chr1	52742053
chr1	52742054
chr1	67281331
chr1	84548234
chr1	84548235
chr1	94680281
chr1	95618264
chr1	105592566
chr1	117985148
chr1	150658653
chr1	150658661
chr1	150658662
chr1	150658697
chr1	153852346
chr1	155512989
chr1	155512990
chr1	155512991
chr1	155512992
chr1	155512993
chr1	155513009
chr1	156491838
chr1	156491840
chr1	156491841
chr1	156491842
chr1	167974983
chr1	167974985
chr1	179797119
chr1	201119093
chr1	205060244
chr1	224553598
chr1	229442109
chr1	229442110
chr1	240658860
chr10	102704476
chr10	102704479
chr10	102704484
chr11	9698860
chr11	9698864
chr11	44766153
chr11	44766199
chr11	44766224
chr11	44766232
chr11	46854112
chr11	46854113
chr11	62403664
chr11	63614459
chr11	65850562
chr11	65850563
chr11	65850564
chr11	65850569
chr11	65850616
chr11	66689695
chr11	66689697
chr11	66689700
chr11	66689708
chr11	67010081
chr11	108126850
chr11	111700611
chr11	111700633
chr11	111700652
chr11	111700670
chr11	111700681
chr11	111700715
chr11	113681082
chr11	113681083
chr11	113681085
chr11	118460736
chr11	118460836
chr12	969549
chr12	46159838
chr12	53783501
chr12	56501369
chr12	112477657
chr12	112477658
chr12	112477660
chr12	112477661
chr12	116606117
chr12	116606118
chr12	116606121
chr12	116606125
chr12	116606127
chr12	116606129
chr12	116606130
chr12	116606132
chr12	116606133
chr12	116606134
chr12	116606135
chr12	116606136
chr12	116606137
chr12	116606138
chr12	116606139
chr12	116665962
chr12	121146006
chr12	121146008
chr12	121146023
chr12	123252943
chr13	28860381
chr13	32540249
chr13	40239213
chr13	40239217
chr13	68601106
chr13	87791407
chr14	37197097
chr14	65421153
chr14	102281736
chr14	102281737
chr14	102281742
chr14	102281834
chr14	102281858
chr14	104258123
chr14	104426223
chr15	35510833
chr15	35510834
chr15	35510837
chr15	35510838
chr15	35510893
chr15	35510902
chr15	65991552
chr15	72181280
chr15	72181281
chr15	72181283
chr15	72181285
chr15	72181444
chr15	72181460
chr15	72181469
chr15	72181471
chr15	72181475
chr15	72181479
chr15	72181500
chr15	72181510
chr15	72181514
chr15	72181523
chr15	72181525
chr15	72181527
chr15	72181529
chr15	73922236
chr15	73922239
chr15	73922240
chr15	73922241
chr15	73922243
chr15	73922244
chr15	75214861
chr15	75214865
chr15	91013889
chr15	93388853
chr15	93388856
chr15	93388857
chr15	93388858
chr15	93388859
chr15	93388860
chr15	93388862
chr16	1606901
chr16	2386868
chr16	3338474
chr16	4095151
chr16	4095152
chr16	4095153
chr16	4095155
chr16	4095157
chr16	14610206
chr16	14640510
chr16	14640511
chr16	14640513
chr16	14640515
chr16	14640516
chr16	14640544
chr16	15974248
chr16	19556367
chr16	19556368
chr16	19556374
chr16	19556499
chr16	19556558
chr16	24575226
chr16	24575227
chr16	29725757
chr16	30307489
chr16	31140773
chr16	31140820
chr16	66924081
chr16	67737730
chr16	68248036
chr16	88844004
chr16	89194479
chr16	89194480
chr16	89798429
chr17	1747321
chr17	1747322
chr17	1747324
chr17	2554203
chr17	3715367
chr17	3715370
chr17	7504927
chr17	7504928
chr17	7504929
chr17	7504934
chr17	7504935
chr17	7504936
chr17	7504941
chr17	8101317
chr17	8101318
chr17	8101319
chr17	8101321
chr17	28505775
chr17	40425218
chr17	44217060
chr17	46324446
chr17	46324447
chr17	66364215
chr17	72988444
chr17	74046769
chr17	77737440
chr17	77792183
chr17	78274927
chr17	78274937
chr17	79905245
chr17	80081917
chr17	80081919
chr17	80081920
chr17	80081921
chr17	80081922
chr17	80081926
chr17	80935956
chr17	80935957
chr17	80935967
chr17	80936038
chr17	80936054
chr17	80936083
chr17	80936124
chr17	80936128
chr17	80936167
chr17	80936170
chr18	9942024
chr18	44443637
chr19	4047317
chr19	11299635
chr19	11299711
chr19	11299714
chr19	11299716
chr19	34681583
chr19	37177562
chr19	46515280
chr19	50346860
chr19	50347156
chr19	57762419
chr19	57762420
chr19	57762421
chr19	57762423
chr19	57762424
chr19	58924384
chr2	27079115
chr2	27079116
chr2	27079117
chr2	27079119
chr2	27079121
chr2	70154032
chr2	70154316
chr2	70154401
chr2	144998141
chr2	178357985
chr2	202266789
chr2	202266791
chr2	204254919
chr2	206606247
chr2	232885944
chr2	232885946
chr2	233602465
chr2	233602469
chr20	4798641
chr20	25383383
chr20	32356217
chr20	34319787
chr20	37248268
chr20	37248271
chr20	37248307
chr20	37248354
chr20	37248359
chr20	57746703
chr20	57747051
chr20	62277490
chr20	62890056
chr20	62890058
chr20	62890060
chr21	47615780
chr22	19269496
chr22	21284676
chr22	21284677
chr22	28660890
chr22	39735704
chr22	40964222
chr22	40964223
chr22	41495699
chr3	17443680
chr3	17443681
chr3	17443682
chr3	17443683
chr3	17451315
chr3	38684700
chr3	48866401
chr3	51614984
chr3	52351572
chr3	52351577
chr3	52351760
chr3	52351767
chr3	52351803
chr3	52351812
chr3	52351828
chr3	52351849
chr3	52351860
chr3	52351869
chr3	52351873
chr3	52351876
chr3	52351877
chr3	52351885
chr3	52351899
chr3	52351902
chr3	52351905
chr3	52351908
chr3	52663148
chr3	52663149
chr3	52663150
chr3	52663151
chr3	52663154
chr3	56629397
chr3	56629401
chr3	57285575
chr3	86892442
chr3	101103228
chr4	26916077
chr4	56630672
chr4	160180736
chr4	169776700
chr4	169776704
chr4	169776707
chr4	170560064
chr4	170560067
chr5	10402560
chr5	68260078
chr5	72126597
chr5	107484132
chr5	116474498
chr5	133306260
chr5	133306261
chr5	133306473
chr5	133306530
chr5	133306536
chr5	133306537
chr5	170306475
chr5	170306478
chr5	170306479
chr5	170306483
chr5	170306485
chr5	170306562
chr5	170332570
chr6	17630181
chr6	17630182
chr6	17630185
chr6	17630187
chr6	17630210
chr6	31065647
chr6	31065651
chr6	31520932
chr6	35642152
chr6	42954172
chr6	42954173
chr6	42954174
chr6	42954175
chr6	42954176
chr6	78125176
chr6	96045733
chr6	152652694
chr7	1529500
chr7	1529504
chr7	2339865
chr7	2339867
chr7	2339868
chr7	2339869
chr7	2339877
chr7	2339878
chr7	2339879
chr7	2339880
chr7	2339919
chr7	2339928
chr7	2339956
chr7	2339974
chr7	2339978
chr7	2339979
chr7	2339981
chr7	2403122
chr7	2403123
chr7	2403124
chr7	2403125
chr7	2403126
chr7	2403135
chr7	21021998
chr7	30394682
chr7	65610180
chr7	65610182
chr7	65610184
chr7	65610198
chr7	74092620
chr7	77548208
chr7	103846551
chr7	103846552
chr7	103846554
chr7	115466413
chr7	140206667
chr8	8698095
chr8	37650264
chr8	37650265
chr8	37650269
chr8	38704507
chr8	38704509
chr8	77267513
chr8	77687872
chr8	77687873
chr8	77687875
chr8	77687877
chr8	77687879
chr8	77687927
chr8	77687958
chr8	77687967
chr8	77687973
chr8	77687980
chr8	77688028
chr8	77688037
chr8	77688046
chr8	77688047
chr8	77688049
chr8	77688050
chr8	77688058
chr8	77688059
chr8	77688060
chr8	77688064
chr8	77688065
chr8	77688067
chr8	77688068
chr8	81985870
chr8	112943775
chr8	122568814
chr8	122568815
chr8	122568816
chr8	122568819
chr8	122568821
chr8	145632189
chr8	145970571
chr8	145970572
chr8	145970573
chr8	145970574
chr8	145970576
chr8	145970578
chr8	145970593
chr8	145970595
chr8	145970600
chr8	145970602
chr8	145970613
chr8	145970632
chr8	145970645
chr8	145970647
chr8	145970666
chr8	145995560
chr8	145995561
chr8	145995563
chr8	145995565
chr8	145995566
chr8	145995567
chr8	145995642
chr8	145995647
chr8	145995651
chr8	145995655
chr8	145995658
chr8	145995660
chr8	145995665
chr8	145995679
chr8	145995685
chr8	145995687
chr8	145995689
chr8	145995692
chr8	145995694
chr8	145995695
chr8	145995705
chr8	145995709
chr8	145995710
chr8	145995711
chr8	145995712
chr8	145995713
chr8	145995717
chr8	145995718
chr8	145995719
chr8	145995723
chr8	145995735
chr8	145995736
chr8	145995741
chr8	145995743
chr8	145995745
chr8	145995746
chr8	145995751
chr8	145995752
chr8	145995754
chr8	145995756
chr8	145995757
chr9	19369930
chr9	19369931
chr9	19369933
chr9	19369934
chr9	19369935
chr9	19369936
chr9	19369937
chr9	19369939
chr9	22174928
chr9	26990132
chr9	26990133
chr9	26990136
chr9	127514813
chr9	127817075
chr9	127817077
chr9	134578952
chr9	134578953
chr9	134578954
chr9	134578955
chr9	134578960
chr9	134579122
chr9	134579146
chr9	134579148
chr9	134579151
chr9	134579152
chr9	134579154
chr9	135190123
chr9	135190131
chr9	139896427
chrX	69542062
chrX	69542065
chrX	102403694
chrX	102403696
chrX	102403698
chrX	102403699
chrX	102403700
chrX	102403705
chrX	102403759
chrX	102403804
chrX	106378140
chrX	154734618
chrX	154734619
chr1	42151740
chr1	100688231
chr1	108445595
chr1	109526680
chr1	205708305
chr1	229794204
chr10	21237742
chr10	83703244
chr10	95434523
chr10	103461652
chr10	103461653
chr10	112643185
chr11	9865119
chr11	20272619
chr11	64541336
chr11	66388270
chr11	82891735
chr12	7095296
chr12	7113417
chr12	47166332
chr12	49599855
chr12	56609076
chr12	121834252
chr12	122180914
chr12	123000538
chr12	132448248
chr12	132574188
chr13	64920937
chr13	67435547
chr13	68601106
chr13	76163160
chr13	96428526
chr14	23039073
chr14	23326118
chr14	53211529
chr14	53211559
chr14	53211592
chr14	53211603
chr14	53211613
chr14	77488299
chr15	75828708
chr15	100304337
chr16	2484699
chr16	28134071
chr16	28943762
chr16	34751405
chr16	46594717
chr16	70403433
chr16	75356439
chr16	89798224
chr17	583802
chr17	7887842
chr17	42894532
chr17	56049088
chr17	63536465
chr17	68120550
chr17	68120551
chr17	68120553
chr17	68120559
chr17	68120688
chr17	68120738
chr17	68120749
chr17	68120765
chr17	68120798
chr17	68120800
chr17	74046769
chr17	80142198
chr19	4405241
chr19	37177562
chr19	51272022
chr2	11453769
chr2	100648812
chr2	136342777
chr2	136342778
chr2	136342779
chr2	136342780
chr2	136342781
chr2	136342782
chr2	136342783
chr2	136342784
chr2	136342785
chr2	136342786
chr2	136342796
chr20	44433901
chr21	47444635
chr21	47444643
chr21	47444644
chr21	47444647
chr21	47444649
chr21	47444650
chr21	47444651
chr21	47444659
chr21	47444662
chr21	47444664
chr21	47444680
chr21	47444753
chr21	47444757
chr21	47444758
chr21	47444759
chr21	47798020
chr22	23688043
chr22	23688045
chr22	23688157
chr22	23688178
chr22	40340402
chr22	47109704
chr3	17443680
chr3	38684700
chr3	106564786
chr3	143217031
chr3	172192464
chr3	195016600
chr4	1176239
chr4	70625775
chr4	70625778
chr4	70625779
chr4	81194666
chr4	99988594
chr4	163141699
chr5	93588321
chr5	107484132
chr5	163687269
chr5	180251170
chr6	31656236
chr6	31754721
chr6	31757343
chr6	31777252
chr6	33874758
chr6	43159976
chr6	43159981
chr6	43159982
chr6	43159991
chr6	43159999
chr6	43160004
chr6	43160010
chr6	131375737
chr6	150022468
chr6	150957427
chr6	150957431
chr6	155014579
chr6	155162267
chr6	155162603
chr7	5376772
chr7	42250659
chr7	42250671
chr7	91947640
chr7	98735980
chr7	99983931
chr7	103801294
chr7	103801295
chr7	103801296
chr7	103801298
chr7	103801300
chr7	135148802
chr8	15500955
chr8	37972721
chr8	145766011
chr8	145766012
chr8	145766021
chr8	145766022
chr8	145766115
chr8	145766125
chr8	145766159
chr8	145766167
chr8	145766170
chr8	145766171
chr8	145766172
chr8	145766173
chr8	145766174
chr8	145766178
chr8	145766179
chr8	145766180
chr8	145766181
chr8	145766182
chr9	37330670
chr9	37330673
chr9	139713362
chr9	139897160
chrX	16843883
chrX	46912434
chrX	48949726
chrX	102806011
chrX	149881701
chrX	149881703
chrX	149881705
chr1	21467976
chr1	28753246
chr1	31495033
chr1	31511704
chr1	31511705
chr1	31511707
chr1	31511708
chr1	36471846
chr1	38295231
chr1	43538773
chr1	44525024
chr1	44525032
chr1	44525033
chr1	44525035
chr1	44525036
chr1	44525286
chr1	44525288
chr1	44525289
chr1	44525306
chr1	44525308
chr1	44525317
chr1	44525318
chr1	44525319
chr1	44525335
chr1	44525336
chr1	44525338
chr1	44525339
chr1	44525341
chr1	44525347
chr1	44525348
chr1	44525353
chr1	44525354
chr1	45209508
chr1	64942566
chr1	154145217
chr10	60703398
chr10	67445621
chr10	76305164
chr10	76305168
chr10	98652383
chr11	246961
chr11	22297019
chr11	34998572
chr11	61089600
chr11	64633964
chr11	65891318
chr11	129130391
chr12	9919902
chr12	46232524
chr12	62763072
chr12	64993248
chr12	65635351
chr12	79991384
chr12	81554894
chr12	100668325
chr12	110463743
chr12	110463749
chr12	110463750
chr12	121192779
chr13	49878476
chr13	68738395
chr13	92133462
chr13	93364624
chr14	71472282
chr15	41595427
chr15	48089873
chr15	60661808
chr15	60661809
chr15	60661810
chr15	60661811
chr15	60661812
chr15	60661813
chr15	60661814
chr15	60661816
chr15	60661824
chr15	60661829
chr15	60661883
chr15	60661911
chr15	60661919
chr15	60661921
chr15	60661922
chr15	60661924
chr15	60661928
chr15	60661936
chr15	60661939
chr15	60661950
chr15	60661954
chr15	60661962
chr15	60661963
chr15	60661964
chr15	60661967
chr15	60661969
chr15	60661970
chr15	60661973
chr15	60661978
chr15	60661979
chr15	60661981
chr15	60661982
chr15	60661983
chr15	60661985
chr15	60661986
chr15	60661988
chr15	60661989
chr15	60661990
chr15	60661991
chr15	60661992
chr15	60661993
chr15	60661994
chr15	60661995
chr15	68578459
chr15	68578469
chr15	68578470
chr15	68578471
chr15	68578472
chr15	68578473
chr15	68578474
chr15	68578476
chr15	68578477
chr15	68578478
chr15	68578513
chr15	68578514
chr15	68578516
chr15	68578519
chr15	68578521
chr15	68578522
chr15	68578523
chr15	68578526
chr15	68578527
chr15	68578528
chr15	68578529
chr15	68578530
chr15	68578532
chr15	68578533
chr15	68578534
chr15	68578536
chr15	68578537
chr15	68578538
chr15	68578539
chr15	68578540
chr15	68578541
chr15	68578542
chr15	68578543
chr15	68578544
chr15	68578545
chr15	68578546
chr15	68578547
chr15	68578548
chr15	68578549
chr15	68578550
chr15	68578552
chr15	73362237
chr15	93485553
chr16	471181
chr16	29931000
chr16	54921540
chr17	805786
chr17	4191456
chr17	10106032
chr17	29221414
chr17	35875982
chr18	55013289
chr18	61554819
chr19	807713
chr19	1908549
chr19	1908550
chr19	1908551
chr19	1908552
chr19	1908553
chr19	1908653
chr19	1908657
chr19	2904423
chr19	6099431
chr19	17590667
chr19	51078398
chr2	17161087
chr2	163873633
chr2	206905709
chr2	242384164
chr20	5544485
chr20	44707970
chr21	33920847
chr22	42259507
chr3	17443680
chr3	17443682
chr3	17443683
chr3	17443684
chr3	38283088
chr3	38684700
chr3	52190989
chr3	52610719
chr3	71349955
chr3	117407703
chr3	154617320
chr3	154617330
chr3	154617332
chr3	154617335
chr3	154617336
chr3	154617474
chr4	2003260
chr4	2003261
chr4	31327004
chr4	102156818
chr4	117342810
chr5	9081955
chr5	22432026
chr5	23265618
chr5	40537332
chr5	107484132
chr5	175589312
chr6	22269195
chr6	30560375
chr6	30560376
chr6	30560377
chr6	30560378
chr6	30560381
chr6	30560383
chr6	30560384
chr6	30560385
chr6	30560430
chr6	30560487
chr6	30560497
chr6	30560505
chr6	31790307
chr6	31790308
chr6	32341818
chr6	70478072
chr6	71146462
chr6	72085977
chr6	77463488
chr6	121404052
chr6	126323706
chr6	126323708
chr6	126323710
chr6	126323712
chr6	126323713
chr6	126323714
chr6	126323715
chr6	126323716
chr6	126323718
chr6	126323720
chr6	126323724
chr6	126323785
chr6	126323788
chr6	126323812
chr6	126323814
chr6	126323818
chr6	126323839
chr6	126323856
chr6	126323864
chr6	126323877
chr6	126323882
chr6	126323887
chr6	126323890
chr6	126323900
chr6	126323905
chr6	126323909
chr6	126323910
chr6	126323917
chr6	126323919
chr6	131375737
chr7	16715023
chr7	30394682
chr7	107217936
chr7	127312167
chr7	144163149
chr7	155547322
chr8	36230351
chr8	119863213
chr9	88919313
chr9	115414800
chr9	123875736
chr9	127731828
chr9	127731831
chr9	127731832
chr9	127731833
chr9	127731838
chr9	127731839
chr9	127731840
chr9	127731841
chr9	127731843
chr9	127731844
chr9	127731845
chr9	127731858
chr9	127731861
chr9	127731879
chr9	127731909
chr9	127731916
chr9	127731920
chr9	127731929
chr9	127731941
chr9	127731946
chr9	127731958
chr9	127731959
chr9	130923675
chr9	133884038
chr9	133884040
chrX	17389166
chrX	70810326
chrX	133520431
chrX	133520477
chr1	11075239
chr1	35822401
chr1	39465249
chr1	43182762
chr1	65087455
chr1	108445595
chr1	109324934
chr1	155811386
chr1	155811392
chr1	155811396
chr1	155811397
chr1	155811399
chr1	155811401
chr1	155811424
chr1	155811427
chr1	156246468
chr1	228679177
chr10	95434523
chr10	112643185
chr10	112643187
chr11	62405174
chr11	62405182
chr11	62405183
chr11	62405186
chr11	62405187
chr11	62405188
chr11	62405190
chr11	64767959
chr11	66388270
chr11	74520307
chr11	82891735
chr11	118708728
chr12	900306
chr12	900307
chr12	900309
chr12	900315
chr12	900316
chr12	900317
chr12	900319
chr12	900321
chr12	900322
chr12	900395
chr12	900396
chr12	900400
chr12	900406
chr12	900409
chr12	900412
chr12	900426
chr12	900433
chr12	900436
chr12	900455
chr12	900456
chr12	900472
chr12	900483
chr12	900484
chr12	900494
chr12	900495
chr12	900499
chr12	900510
chr12	900512
chr12	900515
chr12	900518
chr12	900524
chr12	900527
chr12	900529
chr12	900530
chr12	900531
chr12	900544
chr12	900553
chr12	900558
chr12	900559
chr12	900560
chr12	900565
chr12	1467125
chr12	6291804
chr12	6590750
chr12	6590754
chr12	7095292
chr12	7095293
chr12	7095294
chr12	7095296
chr12	7095297
chr12	7095298
chr12	8866601
chr12	47166332
chr12	49599855
chr12	50329740
chr12	56609076
chr12	56609077
chr12	56609078
chr12	56609079
chr12	56609080
chr12	94763261
chr12	98939067
chr12	98939071
chr12	98939072
chr12	98939075
chr12	98939076
chr12	98939084
chr12	98939094
chr12	98939107
chr12	98939121
chr12	98939128
chr12	98939135
chr12	98939139
chr12	98939140
chr12	98939152
chr12	121834252
chr12	122180914
chr12	123000538
chr12	132574186
chr12	132574187
chr12	132574188
chr12	132574189
chr12	132574190
chr12	132574191
chr13	45106976
chr13	64920929
chr13	76163160
chr13	80383502
chr13	91707752
chr13	91707753
chr13	91707755
chr13	91707757
chr13	91707765
chr13	91707920
chr13	91707941
chr13	91707943
chr13	91707954
chr13	91707967
chr13	91707971
chr13	91707980
chr13	91707985
chr13	91707989
chr13	91707993
chr13	91708008
chr13	91708027
chr13	91708029
chr13	91708031
chr13	91708032
chr13	91708041
chr13	91708043
chr13	91708044
chr13	91708045
chr13	91708049
chr13	91708052
chr13	96428524
chr13	96428525
chr13	96428526
chr13	96428529
chr13	96428531
chr13	113189237
chr14	23039073
chr14	75435535
chr14	81927123
chr14	100481659
chr15	37369335
chr15	43651063
chr15	43651247
chr15	43651251
chr15	75828708
chr15	78448574
chr16	704037
chr16	704038
chr16	704040
chr16	704041
chr16	704042
chr16	704043
chr16	1735348
chr16	1735395
chr16	1735397
chr16	1735405
chr16	1735427
chr16	1735457
chr16	1735475
chr16	1735477
chr16	1735497
chr16	1735500
chr16	1735505
chr16	1735524
chr16	1735535
chr16	1735536
chr16	2484699
chr16	23923188
chr16	28134071
chr16	46594717
chr16	70403433
chr17	583802
chr17	929464
chr17	4321630
chr17	42873945
chr17	48824614
chr17	58939201
chr17	80142198
chr18	12815984
chr18	13665446
chr18	66400567
chr19	950610
chr19	3846889
chr19	3846891
chr19	3846892
chr19	3846893
chr19	3846894
chr19	3846895
chr19	3846915
chr19	3847049
chr19	3847055
chr19	3847061
chr19	3847088
chr19	3847093
chr19	3847095
chr19	3847096
chr19	3847109
chr19	3847112
chr19	3847116
chr19	3847119
chr19	3847126
chr19	3847130
chr19	3847131
chr19	3847134
chr19	3847137
chr19	3847138
chr19	3847142
chr19	3847143
chr19	3847145
chr19	3847148
chr19	3847149
chr19	3847151
chr19	3847153
chr19	3847154
chr19	3847157
chr19	3847165
chr19	3847167
chr19	3847174
chr19	3847183
chr19	3847188
chr19	3847199
chr19	3847200
chr19	3847204
chr19	3847208
chr19	6099431
chr19	14253568
chr19	18137555
chr2	11453769
chr2	73645047
chr2	128500180
chr2	128500204
chr2	128500230
chr2	136342778
chr2	163873633
chr2	201282036
chr21	36807617
chr21	47444635
chr21	47798015
chr21	47798020
chr21	47798021
chr21	47798022
chr21	47798023
chr21	47798024
chr21	47798025
chr21	47798026
chr21	47798028
chr21	47798083
chr21	47798092
chr21	47798112
chr21	47798125
chr21	47798128
chr21	47798137
chr21	47798139
chr21	47798143
chr21	47798145
chr21	47798146
chr22	38881425
chr22	45067700
chr3	17443680
chr3	38684700
chr3	49547645
chr3	49547646
chr3	49547648
chr3	49547650
chr3	49547653
chr3	49547655
chr3	49547656
chr3	49547657
chr3	49547659
chr3	49547680
chr3	49547747
chr3	49547749
chr3	49547750
chr3	49547756
chr3	49547762
chr3	49547765
chr3	49547776
chr3	49547777
chr3	49547780
chr3	49547782
chr3	49547786
chr3	49547787
chr3	49547788
chr3	49547792
chr3	49547794
chr3	49547799
chr3	49547802
chr3	49547805
chr3	49547806
chr3	49547808
chr3	49547809
chr3	49547811
chr3	49547815
chr3	49547817
chr3	49547818
chr3	49547820
chr3	49547821
chr3	49547828
chr3	49547829
chr3	49547833
chr3	49547834
chr3	49547835
chr3	49547836
chr3	49547837
chr3	49547838
chr3	49547839
chr3	49547840
chr3	49547841
chr3	49547842
chr3	49547843
chr3	49547844
chr3	49547845
chr3	49547846
chr3	49547847
chr3	49547848
chr3	49547850
chr3	49547851
chr3	49547854
chr3	49547857
chr3	49547861
chr3	49547862
chr3	49547863
chr3	49547864
chr3	49547867
chr3	49547869
chr3	49547870
chr3	49547871
chr3	49547872
chr3	49547873
chr3	49547875
chr3	49547876
chr3	49547877
chr3	49547879
chr3	49547880
chr3	49547882
chr3	49547887
chr3	49547888
chr3	49547891
chr3	49547892
chr3	49547894
chr3	49547898
chr3	49547899
chr3	49547900
chr3	49547902
chr3	49547903
chr3	49547904
chr3	49547905
chr3	49547906
chr3	49547907
chr3	49547909
chr3	87408880
chr3	87408881
chr3	87408887
chr3	87408888
chr3	87408889
chr3	87408890
chr3	87408891
chr3	87408892
chr3	87408894
chr3	87408895
chr3	87408896
chr3	87408897
chr3	87408915
chr3	87408947
chr3	87408986
chr3	87408988
chr3	87408989
chr3	87408990
chr3	87409011
chr3	87409014
chr3	87409017
chr3	87409022
chr3	87409025
chr3	87409026
chr3	87409028
chr3	87409032
chr3	87409033
chr3	87409038
chr3	87409040
chr3	87409041
chr3	87409042
chr3	87409053
chr3	87409056
chr3	87409059
chr3	87409060
chr3	87409063
chr3	87409067
chr3	87409070
chr3	87409071
chr3	87409072
chr3	87409073
chr3	87409077
chr3	87409078
chr3	87409079
chr3	87409080
chr3	87409087
chr3	87409088
chr3	106564786
chr3	106564790
chr3	141768779
chr3	184048898
chr4	68624940
chr4	70625775
chr4	71160778
chr4	99988594
chr4	99988595
[truncated: 103 more rows]

## Sheet: BRACO19_32
Table S5c: List of integration sites in telomeres after BRACO-19 treatment.
BRACO-19 (32uM) Treatment				Telomere Chromosomal Locations
Chromosome	Integration site location		Chromosome	Start (hg19)	End (hg19)	# integration sites
chr1	1352919		chr1	0	10000	0
chr1	1352920		chr1	249240621	249250621	0
chr1	1352921		chr2	0	10000	0
chr1	1352922		chr2	243189373	243199373	0
chr1	1352923		chr3	0	10000	0
chr1	1352924		chr3	198012430	198022430	0
chr1	21467905		chr4	0	10000	0
chr1	21467906		chr4	191144276	191154276	0
chr1	21467933		chr5	0	10000	0
chr1	21467935		chr5	180905260	180915260	0
chr1	21467937		chr6	0	10000	0
chr1	21467939		chr6	171105067	171115067	0
chr1	21467948		chr7	0	10000	0
chr1	21467953		chr7	159128663	159138663	0
chr1	21467955		chr8	0	10000	0
chr1	21467961		chr8	146354022	146364022	0
chr1	21467963		chr9	0	10000	0
chr1	21467965		chr9	141203431	141213431	0
chr1	21467968		chr10	0	10000	0
chr1	21467969		chr10	135524747	135534747	0
chr1	21467970		chr11	0	10000	0
chr1	21467971		chr11	134996516	135006516	0
chr1	21467972		chr12	0	10000	0
chr1	21467973		chr12	133841895	133851895	0
chr1	21467974		chr13	0	10000	0
chr1	21467975		chr13	115159878	115169878	0
chr1	21467976		chr14	0	10000	0
chr1	21467989		chr14	107339540	107349540	0
chr1	21467992		chr15	0	10000	0
chr1	21467995		chr15	102521392	102531392	0
chr1	28753246		chr16	0	10000	0
chr1	28753247		chr16	90344753	90354753	0
chr1	28753250		chr17	NA	NA	0
chr1	31495033		chr17	NA	NA	0
chr1	45209508		chr18	0	10000	0
chr1	46356990		chr18	78067248	78077248	0
chr1	46357003		chr19	0	10000	0
chr1	154145217		chr19	59118983	59128983	0
chr1	154145219		chr20	0	10000	0
chr1	154145220		chr20	63015520	63025520	0
chr1	154145221		chr21	0	10000	0
chr1	179308893		chr21	48119895	48129895	0
chr1	187998394		chr22	0	10000	0
chr1	217790619		chr22	51294566	51304566	0
chr1	217790620		chrX	0	10000	0
chr1	220399027		chrX	155260560	155270560	0
chr1	223126658		chrY	0	10000	0
chr1	225811151		chrY	59363566	59373566	0
chr1	225811153
chr1	225811157
chr1	225811158
chr1	225818189
chr1	227472256
chr1	231464203
chr1	231464207
chr1	231464208
chr10	76305164
chr10	104036986
chr11	246961
chr11	342041
chr11	27411709
chr11	34998572
chr11	61089600
chr11	61089601
chr11	61089602
chr11	61089603
chr11	61089604
chr11	63501472
chr11	63501497
chr11	71586400
chr11	82891735
chr11	123198190
chr11	123198191
chr11	123198192
chr11	123198194
chr11	123198196
chr11	123198223
chr11	123198230
chr11	123198235
chr11	129130391
chr11	129130393
chr12	49085715
chr12	49410502
chr12	52057867
chr12	52057868
chr12	52057869
chr12	52057873
chr12	54009770
chr12	54009772
chr12	54009894
chr12	54009933
chr12	54009966
chr12	54009973
chr12	64993248
chr12	65635349
chr12	65635351
chr12	79057442
chr12	79991384
chr12	100668325
chr12	100668327
chr12	112123159
chr12	112123160
chr12	112123162
chr12	112123163
chr12	112123164
chr12	112123165
chr12	123366422
chr14	71472282
chr14	98232806
chr14	105710988
chr15	34654625
chr15	34654626
chr15	34654629
chr15	36664856
chr15	36664857
chr15	36664860
chr15	36664872
chr15	36664914
chr15	36664932
chr15	36664945
chr15	60661811
chr15	60661813
chr15	62957327
chr15	73362236
chr15	73362237
chr15	73362238
chr15	73362239
chr15	73362241
chr15	73362242
chr15	73362243
chr15	73362253
chr15	73362273
chr15	73912747
chr15	74748554
chr15	74748559
chr15	74748584
chr15	74748587
chr15	74748599
chr15	74748611
chr15	74748617
chr15	74748618
chr15	74748621
chr15	74748623
chr15	74748629
chr15	74748636
chr15	74748641
chr15	76345646
chr15	76977837
chr15	76977838
chr15	91101561
chr15	91101562
chr15	91101565
chr15	91101652
chr15	91101679
chr15	91101689
chr15	91101734
chr15	91101736
chr15	91101765
chr15	93485553
chr16	355337
chr16	471181
chr16	1915955
chr16	1915959
chr16	2809701
chr16	2809702
chr16	2809703
chr16	2809706
chr16	2809843
chr16	4449079
chr17	463307
chr17	1690930
chr17	1690936
chr17	1690940
chr17	1690963
chr17	1690973
chr17	1690999
chr17	1691016
chr17	1691028
chr17	1691034
chr17	4894544
chr17	5194960
chr17	7523938
chr17	29221414
chr17	29450201
chr17	33981301
chr17	33981336
chr17	33981393
chr17	35728453
chr17	36109059
chr17	38028191
chr17	40419119
chr17	40745028
chr17	42968742
chr17	45504483
chr17	45504486
chr17	45504488
chr17	45504489
chr17	45504490
chr17	72222597
chr17	72222601
chr17	72222602
chr17	72222608
chr17	72222710
chr17	72222714
chr17	72222718
chr17	72222721
chr17	72222724
chr17	72222730
chr17	72222742
chr17	72222745
chr17	72222750
chr17	72222770
chr17	72222774
chr17	72222776
chr17	72222777
chr17	72222778
chr17	72222780
chr17	72222782
chr17	72222787
chr17	72222792
chr17	72222793
chr17	72222794
chr17	72222797
chr17	72222798
chr17	72222807
chr17	72222809
chr17	72222811
chr17	72222813
chr17	72222814
chr17	72222817
chr17	72222819
chr17	72222821
chr17	72222822
chr17	72222826
chr17	72222830
chr17	72222842
chr17	72222845
chr17	72222847
chr17	72222850
chr17	72222851
chr17	72222852
chr17	73169284
chr17	78262240
chr18	5434688
chr18	55013288
chr18	55013289
chr18	55013290
chr18	55013292
chr18	55013293
chr18	55013295
chr18	55013296
chr19	1016715
chr19	1371524
chr19	2007196
chr19	5737393
chr19	8244296
chr19	8244298
chr19	8244557
chr19	8244584
chr19	8244594
chr19	8244610
chr19	12699729
chr19	18963867
chr19	34645350
chr19	34645351
chr19	37177562
chr19	51078398
chr2	32716099
chr2	37244255
chr2	69700195
chr2	69700197
chr2	69700200
chr2	69700203
chr2	69700204
chr2	69700205
chr2	69700206
chr2	69700306
chr2	69700320
chr2	69700327
chr2	69700330
chr2	69700345
chr2	69700372
chr2	69700373
chr2	69700382
chr2	69700391
chr2	69700406
chr2	69700412
chr2	69700417
chr2	69700419
chr2	69700426
chr2	69700427
chr2	69700429
chr2	69700430
chr2	69700432
chr2	69700433
chr2	69700438
chr2	69700440
chr2	69700441
chr2	69700448
chr2	69700456
chr2	69700460
chr2	69700466
chr2	232885944
chr20	5544485
chr20	33465962
chr20	33948898
chr20	33948902
chr20	33968506
chr20	44707970
chr20	45920667
chr20	45920728
chr20	45920729
chr20	45920746
chr20	45920799
chr20	45920810
chr20	45920819
chr20	45920834
chr20	45920846
chr20	45920853
chr20	45920854
chr20	45920859
chr20	62359801
chr21	45453756
chr21	45453764
chr21	45453887
chr22	28291554
chr22	29669164
chr22	42259507
chr22	50650435
chr22	50650440
chr22	50650442
chr22	50650443
chr22	50650446
chr22	50650519
chr22	50650530
chr22	50650531
chr22	50650540
chr22	50650544
chr22	50650545
chr22	50650552
chr22	50650584
chr22	50650605
chr22	50650616
chr22	50650626
chr22	50650634
chr22	50971522
chr3	17443680
chr3	17443682
chr3	17443683
chr3	17556164
chr3	38283088
chr3	38684700
chr3	48879328
chr3	71349955
chr3	71349956
chr3	71349959
chr3	117285603
chr3	117285611
chr3	117285612
chr3	117285613
chr3	117285717
chr3	117285760
chr3	117285804
chr3	117285808
chr3	117285830
chr3	117285839
chr3	117285840
chr3	117285841
chr3	117285847
chr3	117285852
chr3	195887285
chr4	2003260
chr4	131761250
chr5	22432026
chr5	34948664
chr5	34948665
chr5	34948666
chr5	34948667
chr5	107484132
chr5	139862449
chr5	139862453
chr5	139862456
chr5	139862457
chr6	31756962
chr6	31790307
chr6	32341818
chr6	32341820
chr6	32341821
chr6	33874758
chr6	55781832
chr6	121404052
chr6	121404056
chr6	145000010
chr6	156731274
chr6	163909097
chr7	16715023
chr7	116614849
chr7	122739828
chr7	135251227
chr7	135251233
chr7	155542756
chr7	155542758
chr7	155542759
chr7	155542760
chr7	155542761
chr7	155542762
chr7	155542763
chr7	155542766
chr7	155542782
chr7	155547322
chr9	127731831
chr9	130923662
chr9	130923673
chr9	130923674
chr9	130923675
chr9	130923676
chr9	130923677
chr9	130923687
chr9	130923741
chr9	130923760
chr9	130923762
chr9	130923769
chr9	130923775
chr9	130923778
chr9	130923801
chr9	130923802
chr9	130923803
chr9	130923807
chr9	130923808
chr9	130923809
chr9	130923815
chr9	130923820
chr9	130923821
chr9	130923822
chr9	130923823
chr9	130923825
chr9	130923829
chr9	130923830
chr9	130923831
chr9	130923835
chr9	133722776
chr9	139883259
chr9	139883268
chr9	139883356
chr9	139883367
chr9	139883387
chr9	139883388
chr9	139883393
chr9	139883394
chr9	139883397
chr9	139883405
chr9	139883408
chr9	139883411
chr9	139883433
chr9	139883439
chr9	139883460
chr9	139883467
chr9	139883477
chr9	139883484
chr9	139883489
chr9	139883498
chr9	139883509
chr9	139883512
chr9	139883515
chr9	139883520
chr9	139883523
chr9	139883539
chr9	139955534
chr9	139955535
chr9	139955536
chrX	54258107
chrX	152947639
chrX	152947673
chrX	152947728
chrX	152947746
chr1	15945424
chr1	15945426
chr1	21973578
chr1	28747341
chr1	35858466
chr1	44504492
chr1	54858502
chr1	150553814
chr1	150553815
chr1	150553816
chr1	150553817
chr1	150553818
chr1	150553819
chr1	150553825
chr1	150553826
chr1	150553848
chr1	150553922
chr1	197701095
chr1	226785056
chr10	21237742
chr10	84007949
chr11	64046289
chr11	69692993
chr11	122542794
chr12	6895050
chr12	6895052
chr12	6895055
chr12	6916945
chr12	6916946
chr12	6916947
chr12	6916949
chr12	6916950
chr12	6916951
chr12	6916952
chr12	6917193
chr12	6917195
chr12	6917197
chr12	6917216
chr12	6917218
chr12	48489773
chr12	48489778
chr12	48489779
chr12	48490036
chr12	48490047
chr12	48490077
chr12	48490088
chr12	48490090
chr12	48490094
chr12	48490104
chr12	48490111
chr12	48490124
chr12	48490133
chr12	48490138
chr12	48490140
chr12	48490148
chr12	48490152
chr12	48490157
chr12	48490159
chr12	48490164
chr12	48490168
chr12	48490170
chr12	48490177
chr12	48490180
chr12	64612003
chr12	66221583
chr12	66221777
chr12	66221784
chr12	66221800
chr12	66221830
chr12	66221871
chr12	66221899
chr12	66221920
chr12	121631927
chr13	73312773
chr13	73312774
chr13	73312775
chr13	73312776
chr13	73312777
chr13	87791407
chr14	23788242
chr14	66989471
chr14	66989472
chr14	66989473
chr14	66989474
chr14	102731069
chr15	43324056
chr15	43324059
chr15	69554345
chr16	1763644
chr16	1763645
chr16	22382927
chr16	28189554
chr16	71740193
chr16	71740194
chr16	71740196
chr16	71740197
chr16	71740198
chr16	71740199
chr16	71740200
chr16	71740201
chr16	71740209
chr16	71740217
chr16	71740219
chr16	71740220
chr16	71740221
chr16	71740222
chr16	71740225
chr17	4226749
chr17	4226750
chr17	4226754
chr17	4226863
chr17	29439359
chr17	29439361
chr17	29439363
chr17	29439365
chr17	29439366
chr17	29439367
chr17	29439368
chr17	29439369
chr17	29439377
chr17	29439425
chr17	29439439
chr17	74727479
chr17	74727480
chr17	74727482
chr17	74727486
chr17	74727487
chr17	74727488
chr17	74727490
chr17	74727492
chr17	74727564
chr17	74727570
chr17	74727574
chr17	74727575
chr17	74727579
chr17	74727607
chr17	74727608
chr17	74727611
chr17	74727612
chr17	74727624
chr17	74727626
chr17	74727629
chr17	74727634
chr17	74727643
chr17	74727646
chr17	74727648
chr17	74727649
chr17	74727653
chr17	74727663
chr17	74727665
chr17	74727670
chr17	74727671
chr17	74727673
chr17	74727674
chr17	74727682
chr17	74727684
chr17	74727689
chr17	74727695
chr17	74727700
chr17	74727701
chr17	74727704
chr17	74727705
chr17	74727706
chr17	74727709
chr17	74727710
chr17	74727714
chr17	79272473
chr17	79272474
chr17	79272475
chr17	79272476
chr17	79272477
chr17	79272478
chr17	79272479
chr17	79272480
chr17	79272481
chr17	79692543
chr17	79692546
chr17	79692558
chr17	79816950
chr17	80487581
chr19	3010788
chr19	3010806
chr19	3010808
chr19	3010810
chr19	3010832
chr19	3010834
chr19	3010838
chr19	3010847
chr19	3010849
chr19	3010885
chr19	3010886
chr19	3010892
chr19	3010902
chr19	3010909
chr19	5937875
chr19	6099431
chr19	7844381
chr19	7844390
chr19	7844391
chr19	7844392
chr19	7844393
chr19	7844394
chr19	7844395
chr19	7844433
chr19	18629522
chr2	3656703
chr2	27451160
chr2	27451162
chr2	27451163
chr2	27451164
chr2	27451165
chr2	27451196
chr2	27451217
chr2	27451236
chr2	27451262
chr2	27451267
chr2	27569625
chr2	50143991
chr2	153157398
chr2	153157399
chr2	153157400
chr2	153157401
chr2	153157402
chr2	153157404
chr2	153157405
chr2	153157410
chr2	153157419
chr2	163873633
chr2	202865393
chr2	202865394
chr2	202865397
chr2	202865398
chr2	202865400
chr2	215996713
chr2	225397271
chr20	37130152
chr20	37130157
chr22	36244295
chr22	36835895
chr22	36835899
chr22	38406420
chr22	38406422
chr22	38406424
chr22	39727822
chr22	39727824
chr22	39727826
chr22	39727828
chr22	39727829
chr22	39727830
chr22	39727831
chr22	39727894
chr22	39727917
chr22	39727933
chr22	39727934
chr22	39727935
chr22	39727939
chr3	17443680
chr3	17443681
chr3	17443683
chr3	38684700
chr3	52292208
chr4	2395142
chr4	160180764
chr5	4454302
chr5	4454303
chr5	4454304
chr5	89948925
chr5	107484132
chr5	176679923
chr5	180251170
chr6	30291760
chr6	33036450
chr6	33036453
chr7	2295947
chr7	79847426
chr7	112719114
chr7	112719119
chr8	8698095
chr8	23110073
chr8	145267392
chr9	8666908
chr9	134099826
chrX	110948843
chrX	110948847
chrX	110948849
chrX	110948879
chrX	110948909
chrX	110948911

## Sheet: TMPyP4_8
Table S5d: List of integration sites in telomeres after TmPyP4 treatment.
TMPYP4 (8uM) Treatment				Telomere Chromosomal Locations
Chromosome	Integration site location		Chromosome	Start (hg19)	End (hg19)	# integration sites
chr1	32586714		chr1	0	10000	0
chr1	36441102		chr1	249240621	249250621	0
chr1	44321107		chr2	0	10000	0
chr1	67281331		chr2	243189373	243199373	0
chr1	103299268		chr3	0	10000	0
chr1	153796522		chr3	198012430	198022430	0
chr1	156491838		chr4	0	10000	0
chr1	159835467		chr4	191144276	191154276	0
chr1	167974983		chr5	0	10000	0
chr1	190757331		chr5	180905260	180915260	0
chr1	201119093		chr6	0	10000	0
chr1	201119094		chr6	171105067	171115067	0
chr1	201119095		chr7	0	10000	0
chr1	228622030		chr7	159128663	159138663	0
chr1	240658860		chr8	0	10000	0
chr10	103913350		chr8	146354022	146364022	0
chr11	855695		chr9	0	10000	0
chr11	3092087		chr9	141203431	141213431	0
chr11	3092092		chr10	0	10000	0
chr11	3092093		chr10	135524747	135534747	0
chr11	3092094		chr11	0	10000	0
chr11	3092116		chr11	134996516	135006516	0
chr11	3092117		chr12	0	10000	0
chr11	3092125		chr12	133841895	133851895	0
chr11	3092131		chr13	0	10000	0
chr11	3092140		chr13	115159878	115169878	0
chr11	3092145		chr14	0	10000	0
chr11	3092147		chr14	107339540	107349540	0
chr11	3092152		chr15	0	10000	0
chr11	3092156		chr15	102521392	102531392	0
chr11	3092160		chr16	0	10000	0
chr11	3092180		chr16	90344753	90354753	0
chr11	3092181		chr17	NA	NA	0
chr11	3092191		chr17	NA	NA	0
chr11	3092195		chr18	0	10000	0
chr11	3092207		chr18	78067248	78077248	0
chr11	3092208		chr19	0	10000	0
chr11	3092209		chr19	59118983	59128983	0
chr11	3092214		chr20	0	10000	0
chr11	3092216		chr20	63015520	63025520	0
chr11	3092220		chr21	0	10000	0
chr11	3092221		chr21	48119895	48129895	0
chr11	3092223		chr22	0	10000	0
chr11	3092228		chr22	51294566	51304566	0
chr11	62636691		chrX	0	10000	0
chr11	64727515		chrX	155260560	155270560	0
chr11	64727516		chrY	0	10000	0
chr11	64727517		chrY	59363566	59373566	0
chr11	64727518
chr11	64727519
chr11	64727520
chr11	72731574
chr11	91048447
chr11	108126850
chr11	116886670
chr11	133370477
chr12	969549
chr12	969555
chr12	53783500
chr12	53783501
chr12	53783502
chr12	53783503
chr12	53783504
chr12	53783505
chr12	53783506
chr12	53783507
chr12	53783508
chr12	53783513
chr12	53783518
chr12	53783537
chr12	53783548
chr12	53783552
chr12	53783553
chr12	53783554
chr12	53783556
chr12	56501369
chr12	56926017
chr12	79057442
chr12	112477657
chr12	116606138
chr12	122898085
chr13	40239213
chr13	75125630
chr13	75125640
chr13	75125641
chr13	75125642
chr13	75125643
chr13	75125644
chr13	75125645
chr13	75125646
chr13	75125647
chr13	75125648
chr13	75125649
chr13	75125650
chr13	109984837
chr14	27168892
chr14	27168896
chr14	27168945
chr14	69903386
chr14	69903390
chr14	69903392
chr14	69903395
chr14	69903396
chr14	69903400
chr14	69903536
chr14	69903571
chr14	69903577
chr14	69903597
chr14	69903609
chr14	69903616
chr14	69903619
chr14	69903636
chr14	102281736
chr14	107143739
chr15	59208998
chr15	65991549
chr15	65991552
chr15	65991554
chr15	65991555
chr15	65991556
chr15	65991559
chr15	93388856
chr16	2386868
chr16	2386870
chr16	2386872
chr16	2386873
chr16	2386874
chr16	2386875
chr16	2386877
chr16	2386880
chr16	2386900
chr16	2386901
chr16	2386905
chr16	2386907
chr16	2386908
chr16	2386909
chr16	2386910
chr16	2386911
chr16	2386912
chr16	2386913
chr16	2386917
chr16	2386920
chr16	2386921
chr16	2386922
chr16	2386923
chr16	2386924
chr16	2386925
chr16	2386926
chr16	2386928
chr16	2386931
chr16	2386932
chr16	2386933
chr16	2386934
chr16	2386935
chr16	2386937
chr16	2386938
chr16	2386939
chr16	2386945
chr16	2386947
chr16	2386948
chr16	2386950
chr16	2386952
chr16	2386954
chr16	2386955
chr16	2386957
chr16	2386958
chr16	2386963
chr16	2386965
chr16	2386966
chr16	2386969
chr16	2386973
chr16	2386976
chr16	2386978
chr16	2386983
chr16	2386984
chr16	2386986
chr16	2386987
chr16	2386988
chr16	2386991
chr16	2386993
chr16	2387035
chr16	28499301
chr16	28499311
chr16	28499312
chr16	28499314
chr16	53551176
chr16	88844004
chr17	6524088
chr17	7504928
chr17	7887842
chr17	7887843
chr17	8101317
chr17	38399532
chr17	40425218
chr17	40425219
chr17	40425220
chr17	40425221
chr17	40425222
chr17	40526677
chr17	42139943
chr17	52924906
chr17	73939897
chr17	75979151
chr17	78264291
chr17	78264293
chr17	78687542
chr17	80081917
chr17	80099422
chr17	80099424
chr17	80099425
chr17	80099426
chr17	80099427
chr17	80099429
chr17	80099430
chr17	80099581
chr17	80099587
chr17	80099594
chr17	80099608
chr17	80099613
chr17	80099627
chr17	80099628
chr17	80099631
chr17	80099647
chr17	80099649
chr17	80099650
chr17	80099651
chr17	80099659
chr17	80099661
chr17	80099665
chr17	80099668
chr17	80099669
chr17	80099670
chr17	80099671
chr17	80099672
chr17	80099677
chr17	80099680
chr17	80099681
chr17	80099683
chr17	80099684
chr17	80099688
chr17	80099690
chr17	80099693
chr17	80099696
chr17	80099697
chr17	80099698
chr17	80099700
chr17	80099701
chr17	80099703
chr17	80099704
chr17	80099705
chr17	80099706
chr17	80099707
chr17	80099709
chr17	80099710
chr17	80099713
chr17	80099717
chr17	80099719
chr17	80099721
chr17	80099722
chr17	80099724
chr17	80099725
chr17	80099726
chr17	80099729
chr17	80099730
chr17	80099732
chr17	80099733
chr17	80166126
chr18	31532758
chr18	44443628
chr18	44443637
chr18	44443639
chr18	44443641
chr18	44443675
chr19	19133454
chr19	34681583
chr19	47406605
chr19	47406606
chr19	47406607
chr19	47406608
chr19	47406610
chr19	47406611
chr19	47406612
chr19	47406613
chr19	47406614
chr19	47406615
chr19	47406623
chr19	47406660
chr19	47406663
chr19	47406665
chr19	47406666
chr19	47406667
chr19	47406668
chr19	47406670
chr19	47406672
chr19	47406673
chr19	47406675
chr19	47406678
chr19	47406679
chr19	47406681
chr19	47406687
chr19	47406688
chr19	47406689
chr19	47406692
chr19	47406693
chr19	47406696
chr19	47406698
chr19	47406700
chr19	47406701
chr19	47406702
chr19	47406704
chr19	47406705
chr19	47406706
chr19	47406707
chr19	47406708
chr19	47406709
chr19	47406710
chr19	47406713
chr19	47406716
chr19	47406719
chr19	47406721
chr19	47406722
chr19	47406723
chr19	47406724
chr19	47406725
chr19	47406726
chr19	47406727
chr19	47406728
chr19	47406729
chr19	47406730
chr19	47406732
chr19	47406733
chr19	47406734
chr19	47406735
chr19	47406737
chr19	47406738
chr19	47406740
chr19	47406743
chr19	47406744
chr19	47406746
chr19	47406747
chr19	47406748
chr19	47406749
chr19	47406750
chr19	47406751
chr19	47406752
chr19	47406753
chr19	47406755
chr19	47406756
chr19	47406758
chr19	47406759
chr19	47406762
chr19	47406763
chr19	47406764
chr19	47406768
chr19	47406772
chr19	47406773
chr19	47406775
chr19	47406779
chr19	47406780
chr19	47406781
chr19	47406782
chr19	47406783
chr19	47406784
chr19	47406785
chr19	47406786
chr19	47406787
chr19	47406788
chr19	47406790
chr19	47406791
chr19	47406792
chr19	47406793
chr19	47406794
chr19	47406795
chr19	47406796
chr19	47406797
chr19	47406799
chr19	47406800
chr19	47406801
chr19	47406802
chr19	47406803
chr19	47406804
chr19	47406805
chr19	47406806
chr19	47406808
chr19	47406809
chr19	47406810
chr19	47406811
chr19	47406812
chr19	47406813
chr19	47406814
chr19	47406815
chr19	47406816
chr19	47406817
chr19	47406819
chr19	47406820
chr19	47406821
chr19	47406822
chr2	3656703
chr2	27079115
chr2	27397839
chr2	144998141
chr2	163873633
chr2	177335810
chr2	202266789
chr2	233602465
chr20	34319783
chr20	34319785
chr20	34319786
chr20	34319787
chr20	34319788
chr20	34319789
chr20	34319790
chr20	34319794
chr20	34319795
chr20	34319833
chr20	34319978
chr22	40598562
chr22	40598571
chr22	40598572
chr22	40598576
chr22	40598577
chr22	40598578
chr22	40598582
chr22	40598654
chr22	40598668
chr22	40598670
chr22	40598675
chr22	40964222
chr22	41495699
chr3	8316157
chr3	17443680
chr3	38684700
chr3	51614981
chr3	51614982
chr3	51614984
chr3	51614987
chr3	77231265
chr3	77231266
chr3	129489280
chr3	136141087
chr4	79570916
chr4	114670473
chr4	139910409
chr4	160180736
chr4	181184542
chr4	181184543
chr4	181184544
chr4	181184550
chr4	181184552
chr4	181184659
chr4	181184717
chr4	181184732
chr4	181184812
chr4	181184825
chr4	181184826
chr4	181184839
chr4	181184840
chr5	41256621
chr5	93958014
chr5	93958016
chr5	107484132
chr5	124857532
chr5	149697365
chr5	163070106
chr5	170332570
chr6	15270223
chr6	30966451
chr6	30966453
chr6	30966454
chr6	30966540
chr6	30966564
chr6	30966569
chr6	30966581
chr6	30966594
chr6	30966601
chr6	30966602
chr6	30966605
chr6	30966609
chr6	30966611
chr6	30966615
chr6	30966620
chr6	30966621
chr6	30966622
chr6	30966624
chr6	30966625
chr6	30966629
chr6	30966632
chr6	30966633
chr6	30966636
chr6	30966637
chr6	30966643
chr6	30966644
chr6	30966648
chr6	30966649
chr6	30966650
chr6	30966651
chr6	30966653
chr6	30966655
chr6	30966661
chr6	30966662
chr6	30966664
chr6	30966665
chr6	30966674
chr6	30966678
chr6	30966679
chr6	30966680
chr6	30966681
chr6	42954172
chr6	44404383
chr6	45324628
chr6	45324629
chr6	45324630
chr6	45324631
chr6	45324632
chr6	45324633
chr6	45324634
chr6	45324635
chr6	45324636
chr6	131375737
chr7	2403122
chr7	4144046
chr7	30394681
chr7	30394682
chr7	30394683
chr7	30394684
chr7	30394685
chr7	30394688
chr7	74092618
chr7	74092619
chr7	74092620
chr7	74092621
chr7	74092622
chr7	103787538
chr7	139069894
chr7	139069897
chr7	139069898
chr7	139069899
chr7	139069901
chr7	139069902
chr7	139069918
chr7	139069978
chr7	139069999
chr7	139070001
chr7	139070002
chr7	139070017
chr7	139070020
chr7	139070025
chr7	139070028
chr7	144163149
chr8	8698095
chr8	77687872
chr8	81985870
chr8	145995560
chr9	33879964
chr9	33879965
chr9	33879966
chr9	33879967
chr9	33879972
chr9	33880031
chr9	33880032
chr9	33880036
chr9	33880042
chr9	94496680
chr9	127817075
chr9	139340202
chr9	139340203
chr9	139340208
chr9	139340235
chr9	139340243
chr9	139340257
chr9	139340270
chr9	139340274
chr9	139340276
chr9	139340280
chr9	139340288
chr9	139340289
chr9	139340291
chr9	139340297
chr9	140499710
chrX	22155497
chr1	1245817
chr1	1245827
chr1	1245935
chr1	21397303
chr1	21397304
chr1	21397306
chr1	21397307
chr1	21397308
chr1	21397384
chr1	21397430
chr1	21397436
chr1	21397441
chr1	21397445
chr1	21397449
chr1	36499892
chr1	39465249
chr1	40689936
chr1	60140056
chr1	60140057
chr1	60140059
chr1	60140060
chr1	60140062
chr1	60140119
chr1	60140121
chr1	60140152
chr1	95618243
chr1	95618248
chr1	95618254
chr1	95618258
chr1	95618290
chr1	95618311
chr1	95618312
chr1	95618321
chr1	95618322
chr1	103299268
chr1	108445595
chr1	150066553
chr1	156491838
chr1	227389132
chr1	228236834
chr1	228669284
chr1	229734390
chr1	244345123
chr10	60123252
chr10	95434523
chr10	95434527
chr11	955847
chr11	20272619
chr11	32241420
chr11	46997116
chr11	62421899
chr11	62421900
chr11	62422062
chr11	62422066
chr11	62422082
chr11	66388270
chr11	66388271
chr11	66388272
chr11	82891735
chr12	1467125
chr12	1467327
chr12	7095296
chr12	47166332
chr12	47166333
chr12	47166334
chr12	47166335
chr12	51517723
chr12	56609076
chr12	94763261
chr12	94856651
chr12	121834252
chr12	122180914
chr12	122762377
chr12	122762379
chr12	122762380
chr12	122762381
chr12	122762382
chr12	122762383
chr12	122762384
chr12	122762386
chr12	122762387
chr12	122762391
chr12	122762392
chr12	122762397
chr12	122762399
chr12	122762400
chr12	122762401
chr12	122762402
chr12	123000538
chr12	123000539
chr12	123000540
chr12	123000541
chr12	123000542
chr12	123000545
chr12	132448248
chr12	132448253
chr12	132574188
chr13	45106976
chr13	45106977
chr13	45106979
chr13	45106980
chr13	45106981
chr13	45106985
chr13	45106990
chr13	49011863
chr13	68601106
chr13	68601108
chr13	68601109
chr13	68601110
chr13	68840399
chr13	76163160
chr13	79905981
chr13	83667184
chr13	96428526
chr14	23039073
chr14	96790535
chr14	103915133
chr14	105477190
chr15	75828707
chr15	75828708
chr15	75828709
chr15	75828712
chr15	75828713
chr15	75828714
chr15	75828716
chr15	75828743
chr15	75828745
chr15	75828748
chr15	100304337
chr16	1657645
chr16	1657648
chr16	2311731
chr16	28134070
chr16	28134071
chr16	28134072
chr16	28134073
chr16	28134074
chr16	28134075
chr16	28134076
chr16	34751405
chr16	46594717
chr16	69857647
chr16	70403433
chr16	89798224
chr16	89798225
chr16	89798226
chr16	89798227
chr16	89798229
chr16	89798233
chr16	89798237
chr16	89798291
chr16	89798299
chr16	89798315
chr16	89798318
chr16	89798327
chr16	89798330
chr16	89798337
chr16	89798345
chr16	89798346
chr16	89798353
chr16	89798357
chr16	89798364
chr16	89798370
chr16	89798372
chr16	89798378
chr16	89798383
chr16	89798387
chr16	89798393
chr16	89798394
chr16	89798395
chr16	89798396
chr16	89798400
chr16	89798405
chr16	89798410
chr16	89798414
chr16	89798417
chr16	89798423
chr16	89798427
chr16	89798429
chr16	89798430
chr16	89798431
chr16	89798440
chr16	89798449
chr16	89798453
chr16	89798454
chr16	89798455
chr16	89798458
chr16	89798459
chr16	89798460
chr16	89798463
chr16	89798464
chr16	89800939
chr17	583802
chr17	17610677
chr17	29684533
chr17	29684534
chr17	29684535
chr17	29684536
chr17	29684537
chr17	29684539
chr17	42873945
chr17	42873946
chr17	42873947
chr17	42873949
chr17	42874017
chr17	58939201
chr17	63536457
chr17	63536464
chr17	63536465
chr17	63536466
chr17	63536467
chr17	63536468
chr17	63536469
chr17	63536477
chr17	63536480
chr17	63536485
chr17	63536488
chr17	74046769
chr17	74046771
chr17	74046773
chr17	74058387
chr17	74058411
chr17	80166131
chr18	66400567
chr19	3818135
chr19	5618123
chr19	36145408
chr19	36145456
chr19	36145467
chr19	39514978
chr19	47388915
chr19	49355411
chr19	49825612
chr19	51272022
chr2	44419319
chr2	44419324
chr2	85774372
chr2	136342778
chr2	188582579
chr2	220140628
chr2	220140629
chr20	8327894
chr20	44433901
chr20	62354208
chr21	33121908
chr21	45100366
chr21	47444635
chr22	30336771
chr22	38881425
chr22	42556211
chr22	42556212
chr22	42556215
chr22	46144740
chr3	9213319
chr3	9213322
chr3	9213323
chr3	9213327
chr3	9213360
chr3	17443680
chr3	17443683
chr3	25677136
chr3	38684700
chr3	42608973
chr3	48291809
chr3	48291810
chr3	48291949
chr3	48291957
chr3	48291961
chr3	48291962
chr3	48291963
chr3	48291964
chr3	48291965
chr3	48291966
chr3	48291967
chr3	48291979
chr3	48292012
chr3	48292084
chr3	50029316
chr3	103634239
chr3	106564786
chr3	111659229
chr3	129489280
chr3	130402907
chr3	143217031
chr3	172192460
chr3	172192464
chr3	172192471
chr3	172192501
chr3	172192534
chr3	172192552
chr3	172192562
chr3	172192578
chr3	184048898
chr3	195016600
chr4	70625775
chr4	99988594
chr4	155723970
chr4	155723974
chr4	157859528
chr4	163141703
chr4	182511215
chr5	105296865
chr5	105296866
chr5	107484132
chr5	138406997
chr5	176625508
chr5	176906998
chr6	19295704
chr6	19295709
chr6	19295712
chr6	19295715
chr6	19295719
chr6	19295723
chr6	19295747
chr6	19295758
chr6	19295763
chr6	19295764
chr6	19295767
chr6	19295768
chr6	19295769
chr6	19295778
chr6	19295779
chr6	31656236
chr6	31698702
chr6	31757340
chr6	31757342
chr6	31757343
chr6	31757344
chr6	31757345
chr6	31757346
chr6	31757347
chr6	31757348
chr6	31757350
chr6	31757351
chr6	31757356
chr6	33874758
chr6	34265844
chr6	34265846
chr6	34265847
chr6	34265848
chr6	34265849
chr6	34265850
chr6	35644088
chr6	52573107
chr6	52573108
chr6	52573109
chr6	52573280
chr6	52573282
chr6	52573290
chr6	52573293
chr6	52573298
chr6	52573299
chr6	52573301
chr6	52573302
chr6	52573304
chr6	52573310
chr6	52573313
chr6	52573322
chr6	52573330
chr6	52573331
chr6	52573335
chr6	52573337
chr6	52573340
chr6	52573347
chr6	52573349
chr6	52573366
chr6	52573367
chr6	52573370
chr6	52573372
chr6	52573374
chr6	52573380
chr6	52573381
chr6	52573386
chr6	52573387
chr6	52573388
chr6	52573392
chr6	150022468
chr6	150957427
chr7	5376772
chr7	5376773
chr7	5376774
chr7	5376775
chr7	20365428
chr7	30913927
chr7	77548208
chr7	98735980
chr7	98735984
chr7	99265463
chr7	100141275
chr7	127697443
chr7	127697724
chr7	127697728
chr7	127697733
chr7	127697737
chr7	127697743
chr7	127697745
chr7	127697749
chr7	127697752
chr7	127697764
chr7	127697771
chr7	127697772
chr7	127697773
chr7	127697779
chr7	127697780
chr7	127697783
chr7	127697784
chr7	127697786
chr7	127697790
chr7	127697794
chr7	127697798
chr7	127697804
chr7	127697817
chr7	127697826
chr7	127697843
chr7	127697844
chr7	127697858
chr7	127697860
chr7	127697863
chr7	127697865
chr7	127697868
chr7	127697870
chr7	127697879
chr7	127697880
chr7	127697888
chr7	127697895
chr7	127697897
chr7	127697899
chr7	127697900
chr7	127697904
chr7	135650579
chr8	15500955
chr8	15500956
chr8	15500957
chr8	75944607
chr8	75944609
chr9	5620615
chr9	88746289
chr9	130075737
chr9	131453706
chr9	139677099
chr9	139713362
chr9	139897146
chr9	139897154
chr9	139897158
chr9	139897159
chr9	139897160
chr9	139897161
chr9	139897162
chr9	139897227
chr9	139897237
chr9	139897246
chr9	139897247
chr9	139897261
chr9	139897263
chr9	139897270
chr9	139897273
chr9	139897276
chr9	139897278
chr9	139897279
chr9	139897280
chr9	139897281
chr9	139897282
chr9	139897283
chr9	139897289
chr9	139897290
chr9	139897292
chr9	139897293
chrX	16843883
chrX	16843888
chrX	16843889
chrX	16843890
chrX	16843891
chrX	16843892
chrX	16843893
chrX	16843949
chrX	16844001
chrX	16844004
chrX	16844012
chrX	16844013
chrX	16844025
chrX	16844032
chrX	46912434
chrX	48949726
chrX	48949738
chrX	102806009
chrX	102806011
chrX	102806012
chrX	102806013
chrX	102806014
chrX	102806015
chrX	102806016
chrX	102806019
chrX	102806038
chrX	102806039
chrX	102806041
chrX	102806042
chrX	117219015
chrX	149881701
chrX	153332055
chr1	21090486
chr1	28701380
chr1	38295782
chr1	39920775
chr1	63880300
chr1	63955548
chr1	63955550
chr1	120579453
chr1	153786902
chr1	225721427
chr1	229624230
chr1	229624233
chr1	229624234
chr1	229624235
chr1	229624236
chr1	229624237
chr1	229624267
chr1	229624289
chr1	229624290
chr1	229624292
chr1	229624316
chr1	229624323
chr1	229624325
chr1	229624329
chr1	229624333
chr1	229624337
chr1	229624343
chr1	229624348
chr1	229624349
chr10	11556217
chr11	19781682
chr11	65848210
chr11	65883246
chr11	66577842
chr11	67461954
chr11	67461958
chr11	128183424
chr12	945479
chr12	42747809
chr12	42747811
chr12	93887916
chr12	120620910
chr12	120620914
chr12	120620916
chr12	120620917
chr12	120620918
chr12	120620919
chr12	120620920
chr12	120620921
chr12	120620922
chr12	120620923
chr12	120620924
chr12	120620925
chr12	120620926
chr12	120620928
chr12	121839688
chr13	80202402
chr14	23230142
chr14	23230143
chr14	23230144
chr14	23230145
chr14	23230146
chr14	23230147
chr14	23230148
chr14	23230151
chr14	30992416
chr14	34007993
chr14	68630347
chr14	69872072
chr14	76211429
chr15	75762666
chr16	1886819
chr16	2452771
chr16	3723485
chr16	3723489
chr16	3723490
chr16	69661402
chr16	88677472
chr16	89289860
chr17	3782703
chr17	3782705
chr17	3782711
chr17	3782715
chr17	3782991
chr17	3782995
chr17	3783000
chr17	3783006
chr17	3783015
chr17	3783016
chr17	3783033
chr17	3783036
chr17	3783043
chr17	3783046
chr17	3783051
chr17	3783052
chr17	3783053
chr17	3783055
chr17	3783075
chr17	3783078
chr17	3783080
chr17	3783085
chr17	3783088
chr17	3783093
chr17	3783102
chr17	3783103
chr17	3783107
chr17	3783111
chr17	3783112
chr17	3783117
chr17	3783118
chr17	26446652
chr17	46922588
chr17	73393313
chr17	75156354
chr18	34451138
chr18	36723422
chr19	6252825
chr19	42838205
chr19	54686428
chr2	24080181
chr2	24080182
chr2	24080183
chr2	24080185
chr2	24080187
chr2	24080189
chr2	24080190
chr2	24080192
chr2	24080198
chr2	68414766
chr2	109095648
chr20	17552595
chr20	25383383
chr20	33333888
chr21	30697527
chr22	24778001
chr22	46695155
chr3	17443680
chr3	38684700
chr3	49812378
chr3	52367967
chr3	52777296
chr3	116095227
chr3	120159192
chr3	136628613
chr3	149592362
chr3	149592363
chr3	149592364
chr3	149592365
chr3	149592366
chr3	149592367
chr3	149592368
chr3	149592369
chr3	149592372
chr3	149592376
chr3	149592377
chr3	149592378
chr3	149592381
chr3	156830249
chr3	182610514
chr3	196460712
chr3	197703849
chr4	186685986
chr4	187638299
chr5	27380011
chr5	54665339
chr5	80872381
chr5	80872385
chr5	107484132
chr5	154301221
chr5	163687266
chr5	163687267
chr5	163687269
chr5	163687270
chr5	163687273
chr5	163687275
chr5	176568338
chr5	176568339
chr5	176568340
chr5	176568341
chr5	176568342
chr5	176568628
chr5	176568648
chr5	176568713
chr5	176568730
chr5	176568731
chr6	34797277
chr6	43556869
chr6	43556873
chr6	43556877
chr6	43556882
chr6	43556883
chr6	43556884
chr6	43556892
chr6	43556926
chr6	43556946
chr6	43556991
chr6	43556993
chr6	43556996
chr6	43556999
chr6	137157680
chr6	139249102
chr7	84231208
chr7	91715482
chr7	91715484
chr7	91715485
chr7	91715486
chr7	91715561
chr7	91715567
chr7	91715609
chr7	91715613
chr7	91715617
chr7	91715637
chr7	91715642
chr7	91715645
chr7	91715647
chr7	91715652
chr7	91715653
chr7	91715655
chr7	103801311
chr7	144163149
chr8	81435832
chr8	81435834
chr8	81435835
chr8	81435839
chr8	81435840
chr8	81435841
chr8	81435842
chr8	81435843
chr8	81435844
chr8	81435845
chr8	81435846
chr8	132854560
chrX	122749251
